# Supplementary material for: Synthesis, structure-activity relationship and evaluation of antifungal activity of tryptanthrin derivatives against drug-resistant Candida albicans
Source: Research Square preprint supplement (doi:10.21203/rs.3.rs-4305369/v1), 2024-05-07
Supplement: Supplementary file 1 [file eb36c679ecd029995f68ad67.docx]

Supporting Information

**Synthesis, structure-activity relationship and evaluation of**

**antifungal activity of tryptanthrin derivatives against**

**drug-resistant *Candida albicans***

**Yandan Wu1**•**Luyi Jiang2**•**Ruina Liu1**•**Lijiao Yang1**•**Fei Zou1**•**Tianyu Zhang1**•**Zefei Fan1**•**Tianbao Zhang1**•**Huan Yang1**•**Shuyun Yin1**•**Ruirui Wang1**•**Ganpeng Li2**•**Guanghui Ni1***

*1 School of Chinese Materia Medica, Yunnan University of Chinese Medicine, Kunming 650500, Yunnan Province, China*

*2 Key Laboratory of Chinese in Ethnic Medicial Resources, State Ethnic Affairs Commission & Ministry of Education, School of Ethnic Medicine, Yunnan MinUniversity, Kunming 650500, Yunnan Province, China*

*e-mail: *[niguanghui@ynucm.edu.cn](mailto:niguanghui@ynutcm.edu.cn)*

**Contents:**

1H and 13C NMR spectra of all compounds 2-33

 HRMS spectra 34-49

**1H and 13C NMR spectra of all compounds**


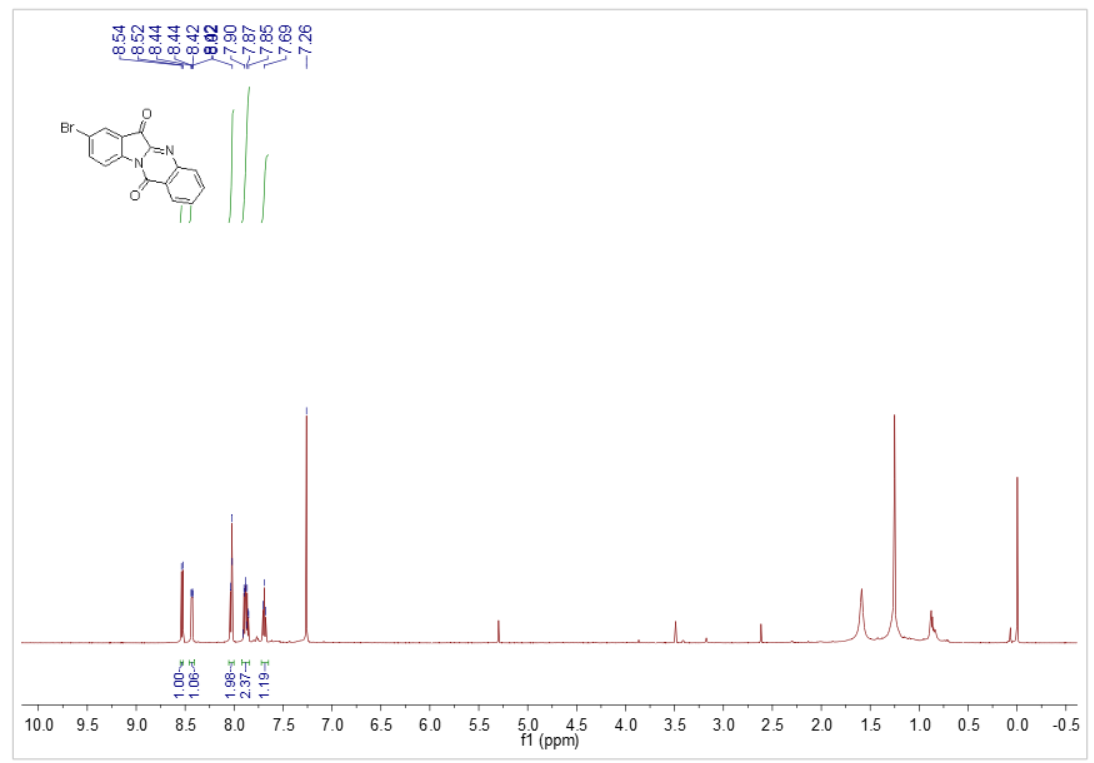


**Figure 1** 1H NMR of compound **3b**


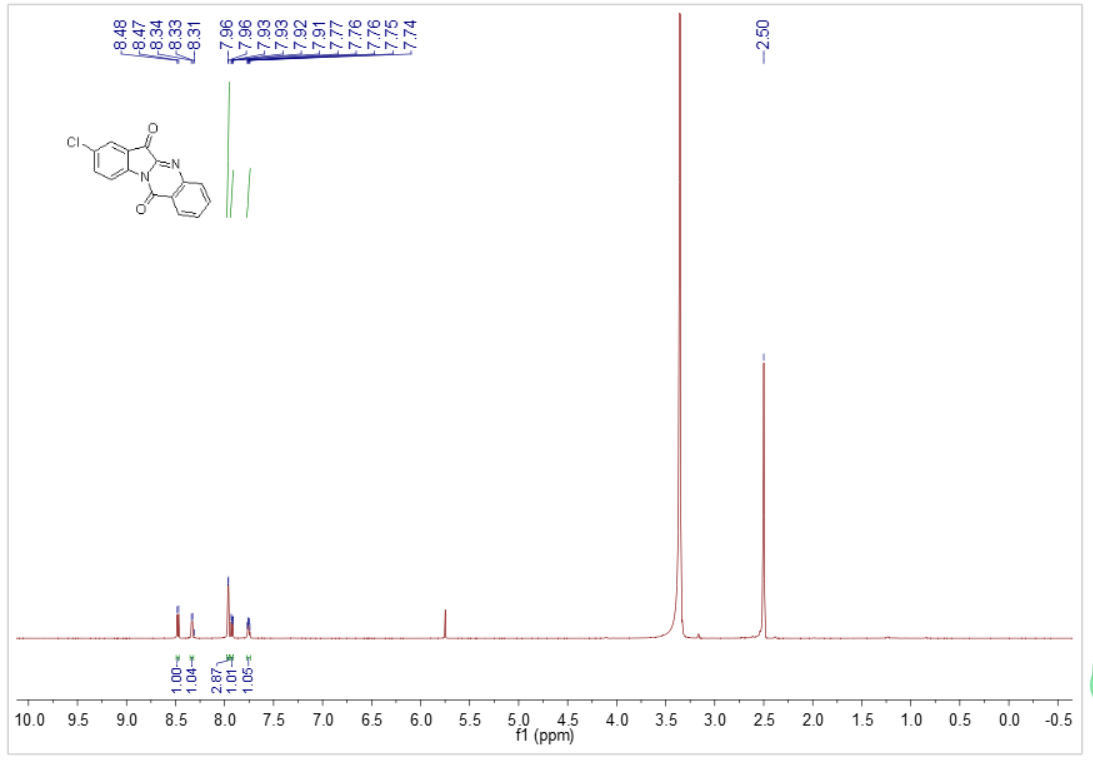


**Figure 2** 1H NMR of compound **3c**


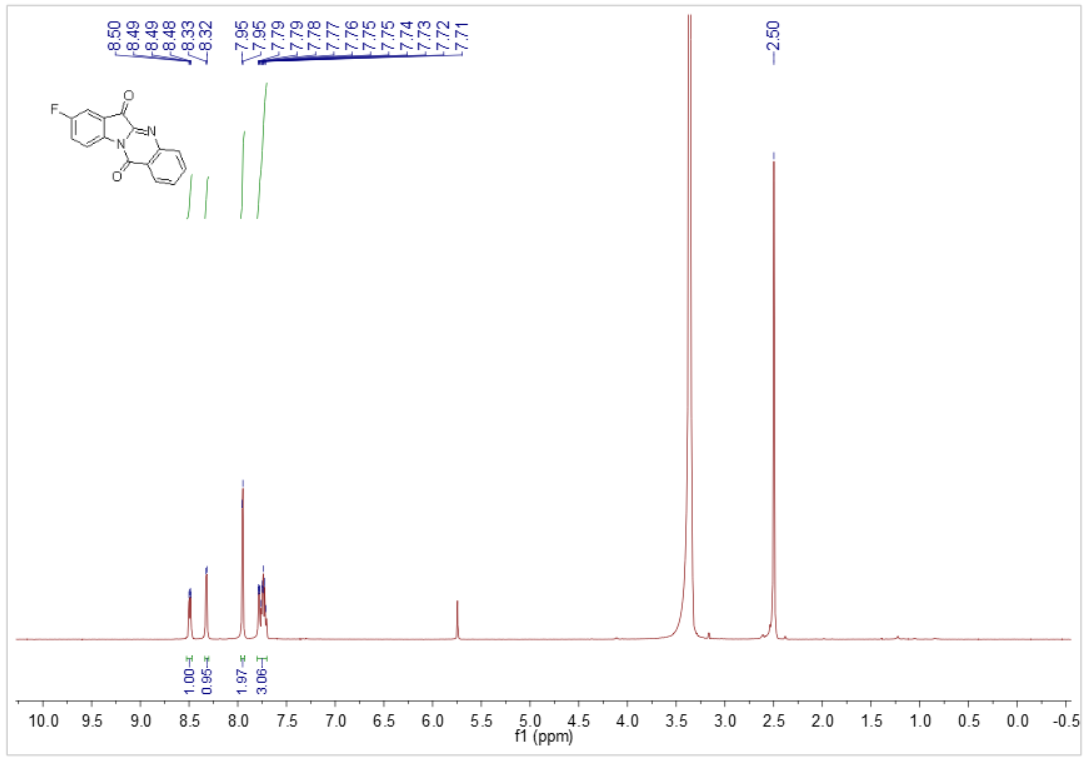


**Figure 3** 1H NMR of compound **3d**


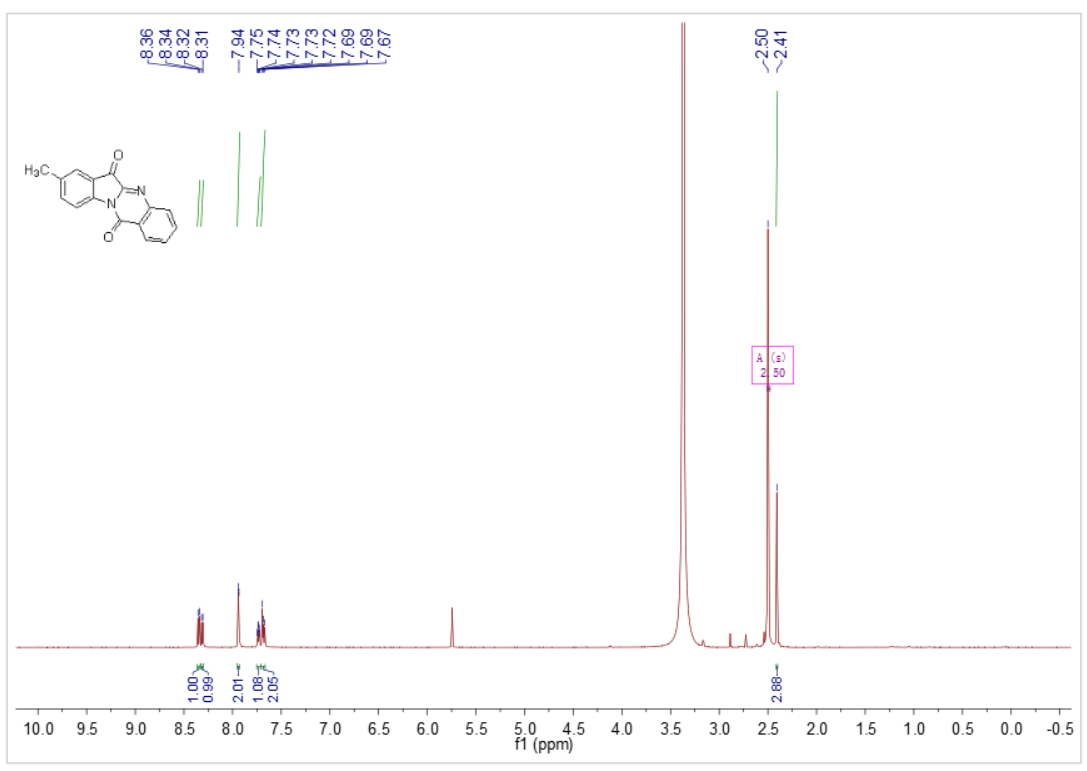


**Figure 4** 1H NMR of compound **3e**


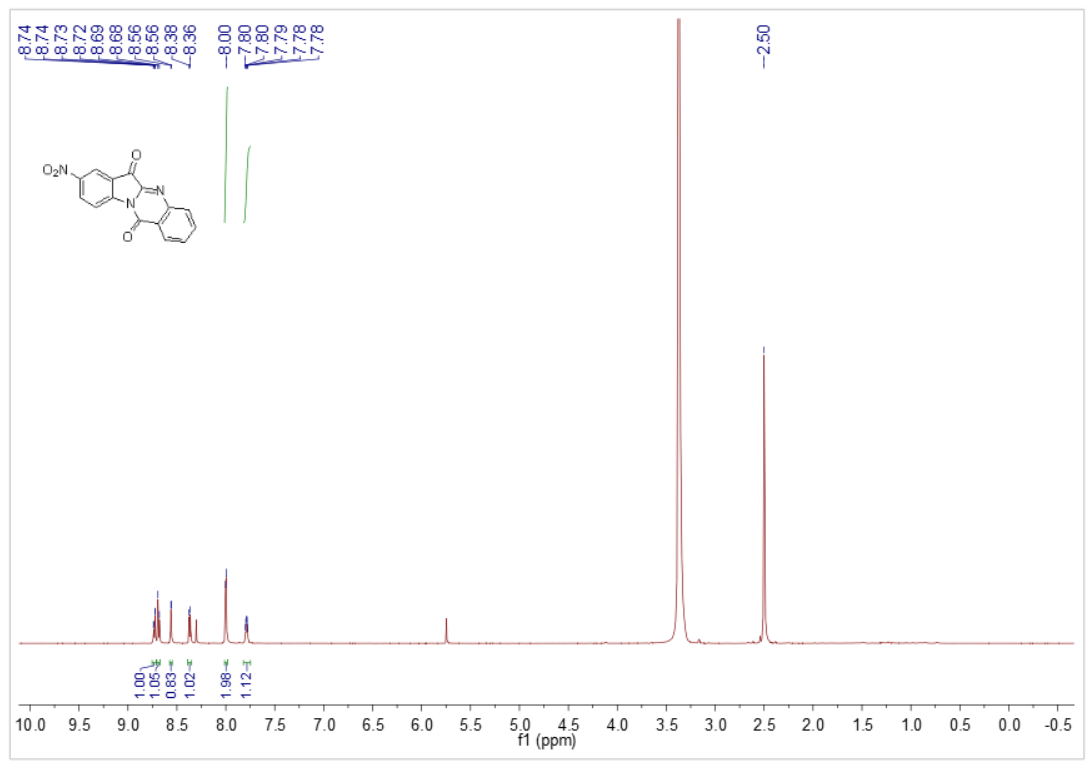


**Figure 5** 1H NMR of compound **3f**


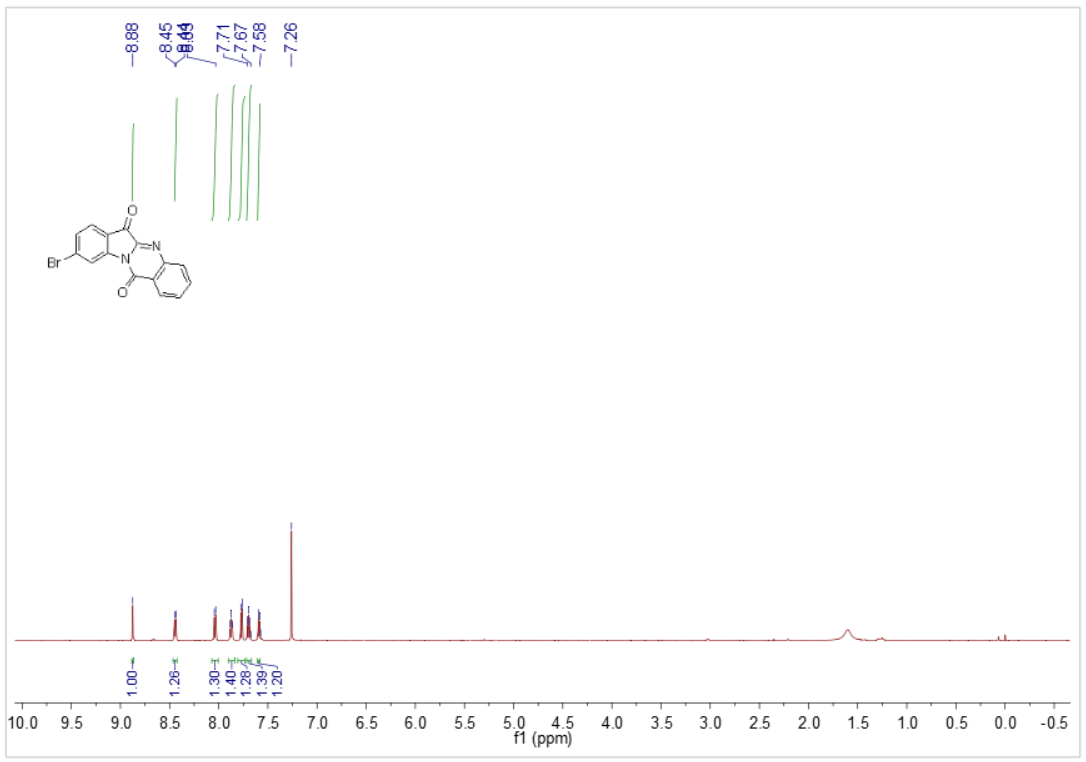


**Figure 6** 1H NMR of compound **3g**


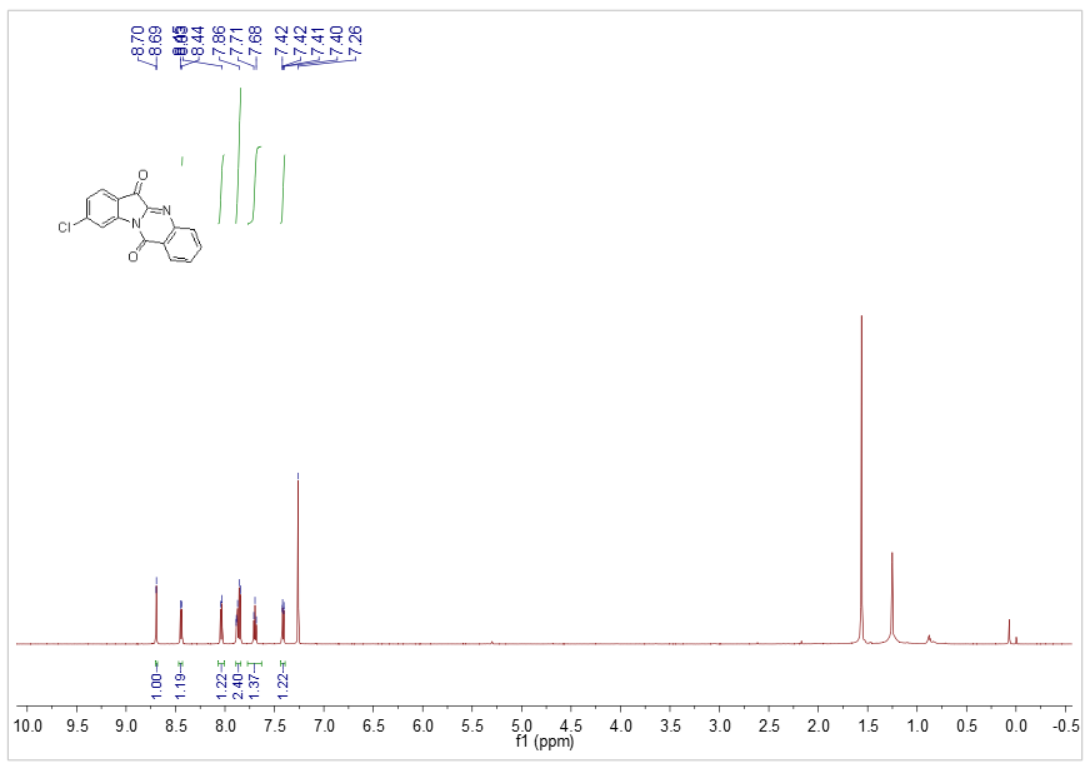


**Figure 7** 1H NMR of compound **3h**


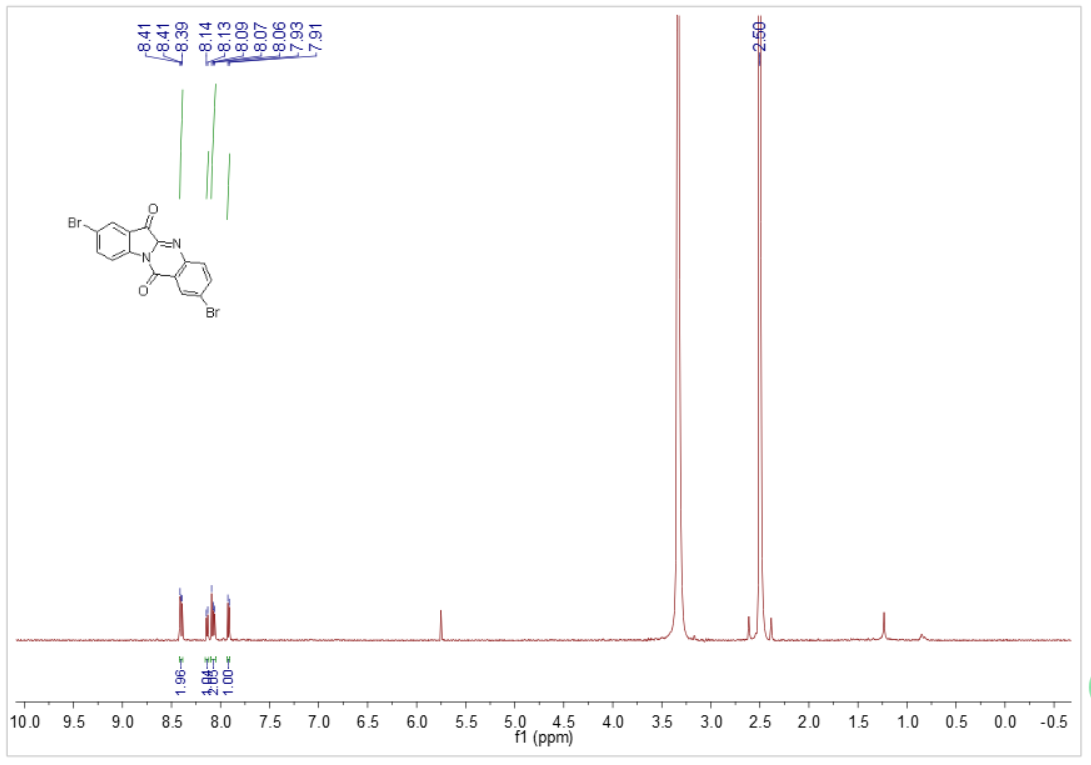


**Figure 8** 1H NMR of compound **3i**


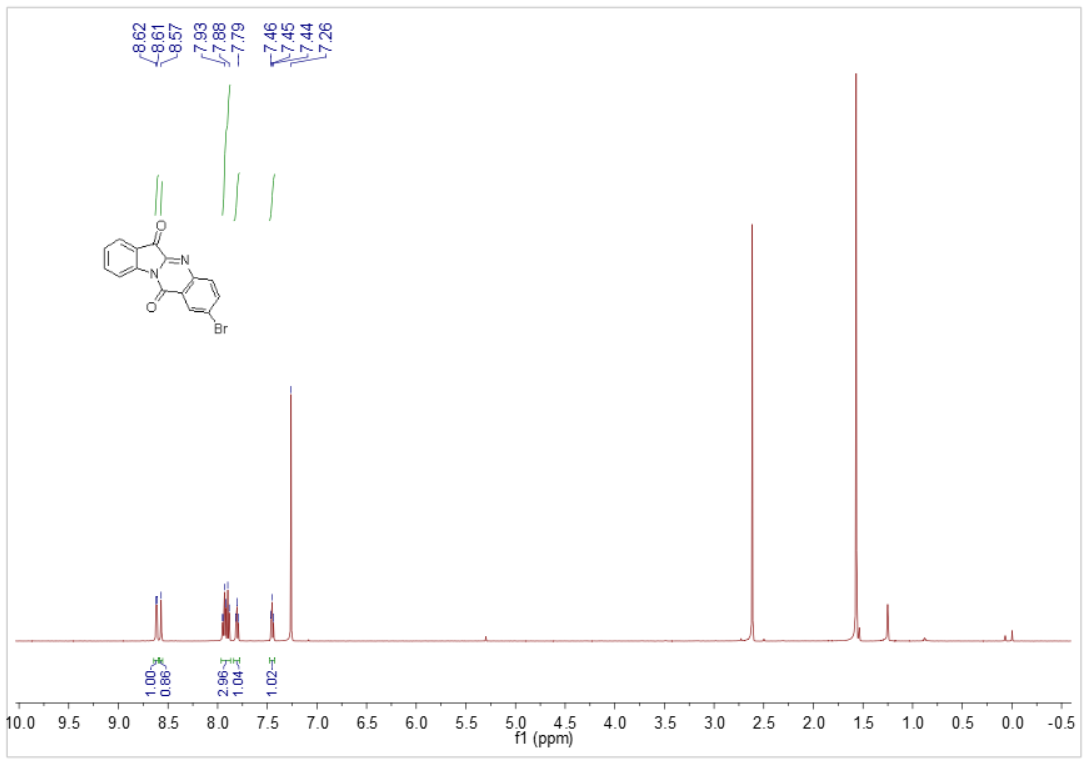


**Figure 9** 1H NMR of compound **3j**


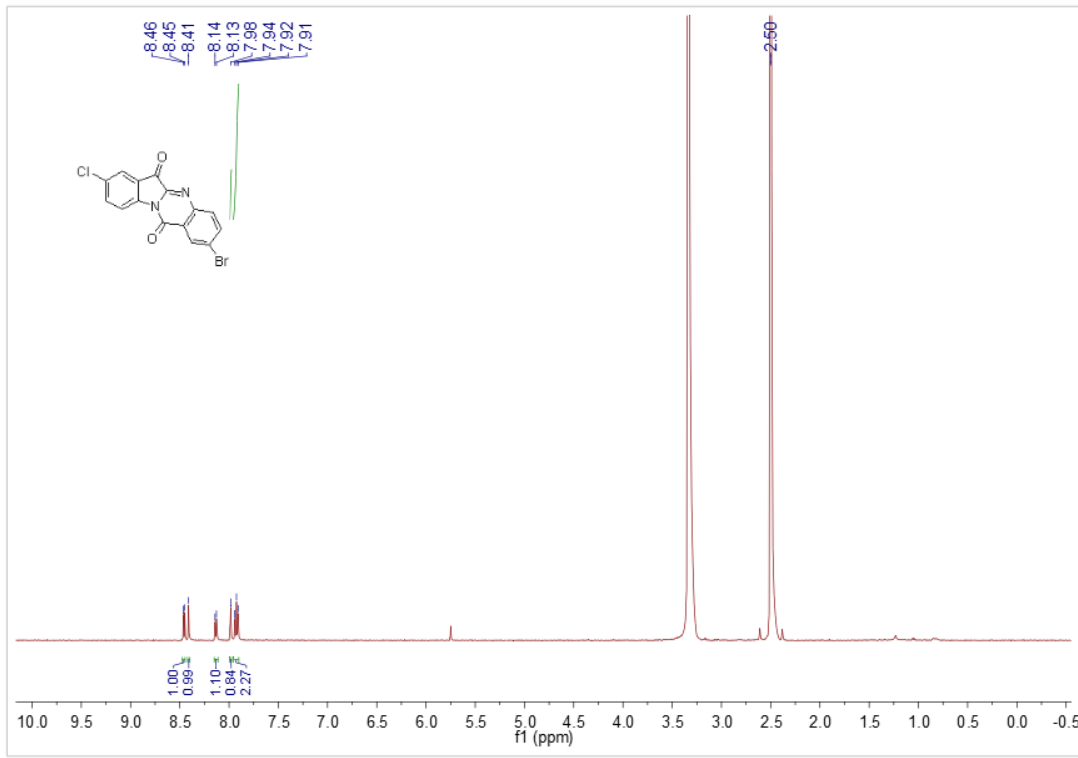


**Figure 10** 1H NMR of compound **3k**


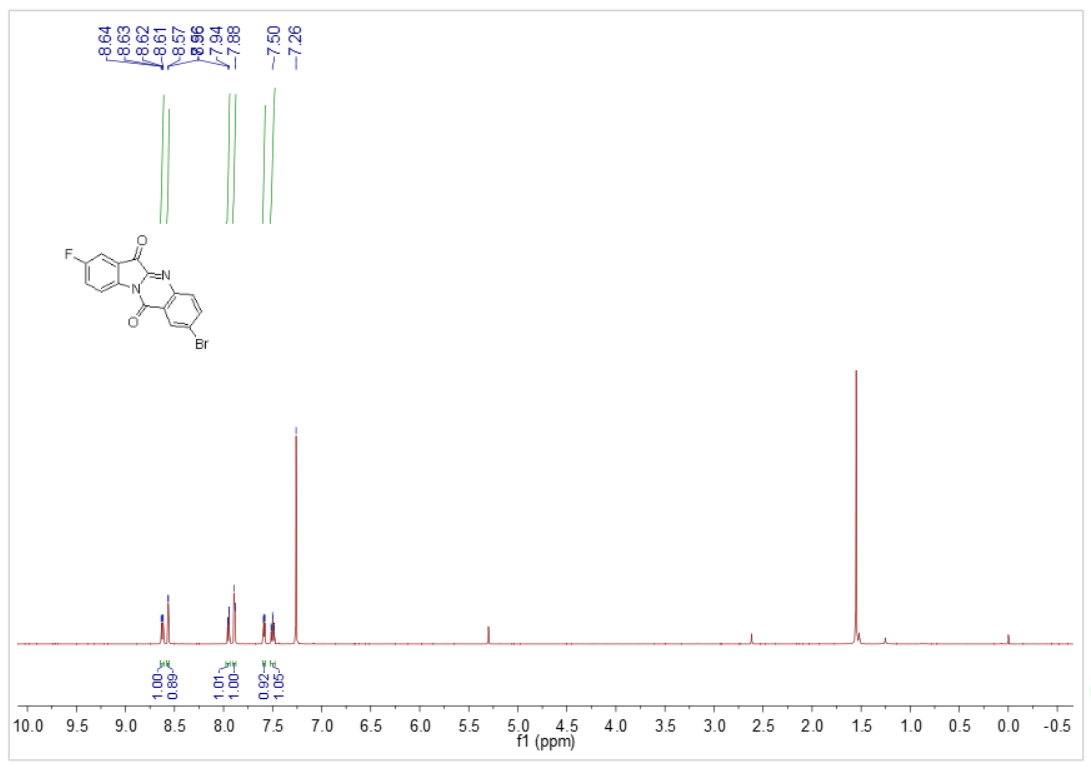


**Figure 11** 1H NMR of compound **3l**


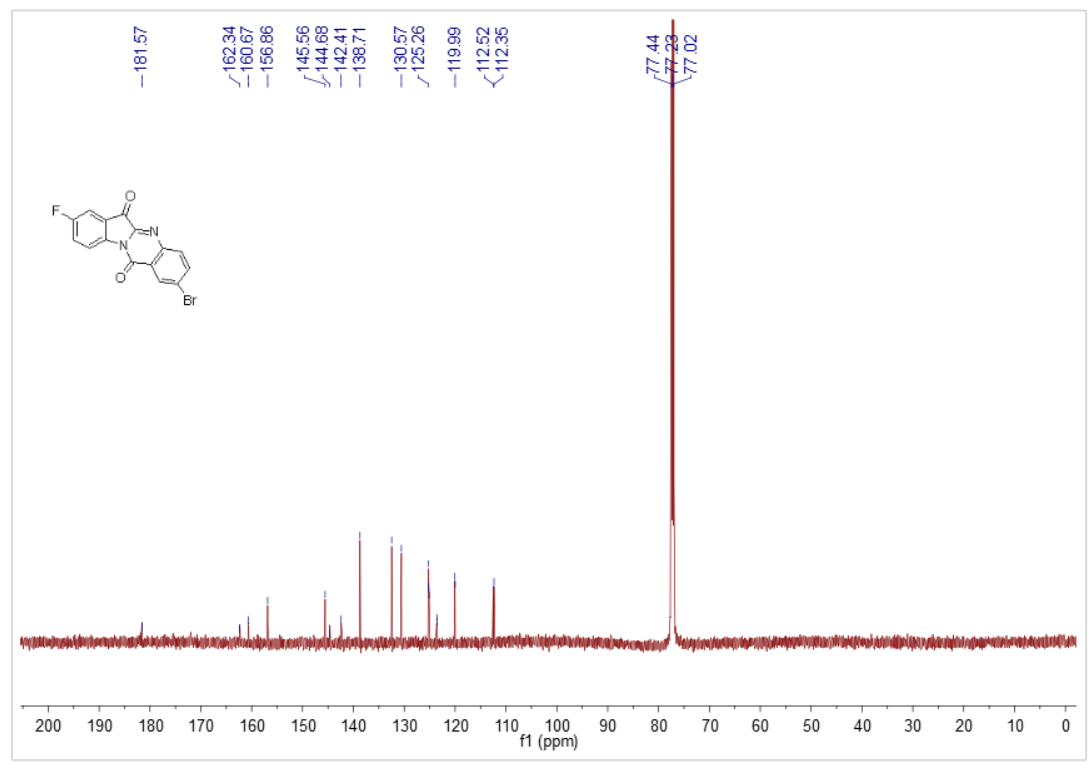


**Figure 12** 13C NMR of compound **3l**


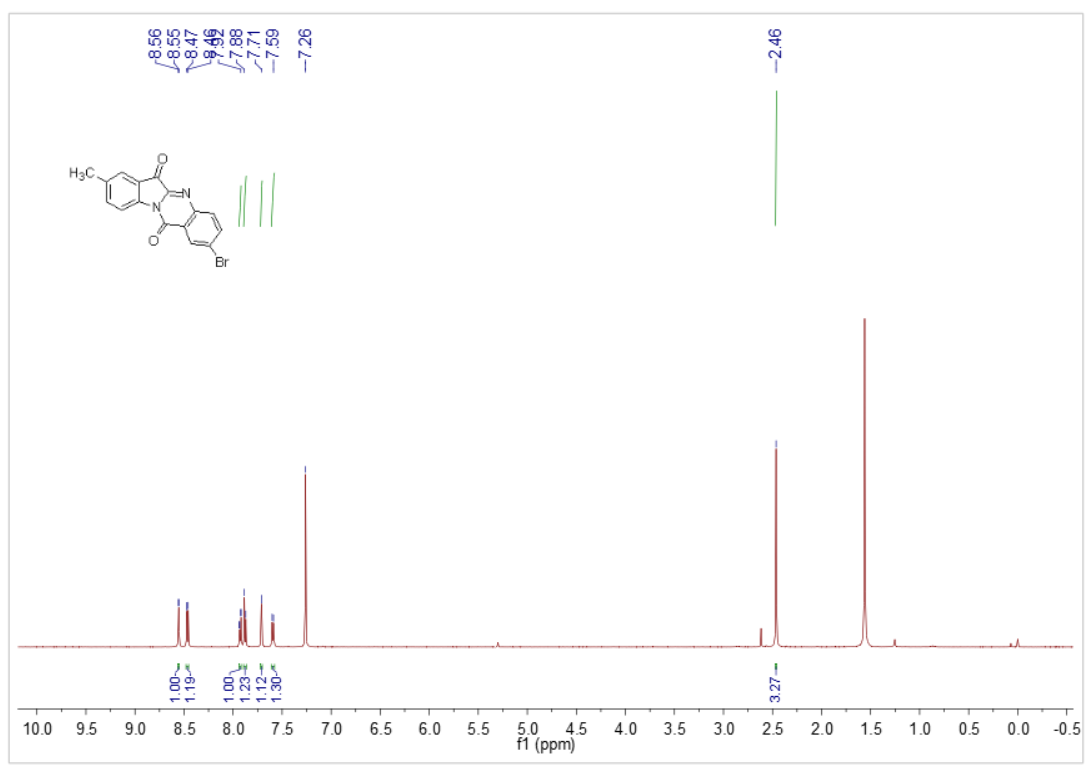


**Figure 13** 1H NMR of compound **3m**


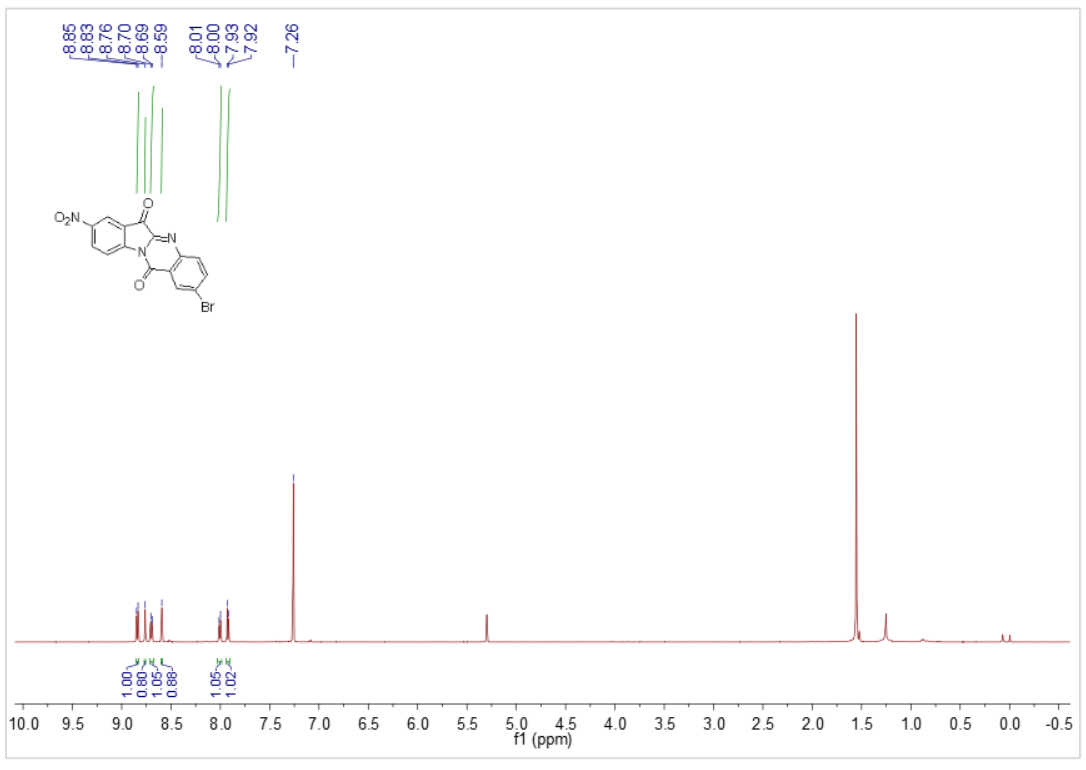


**Figure 14** 1H NMR of compound **3n**


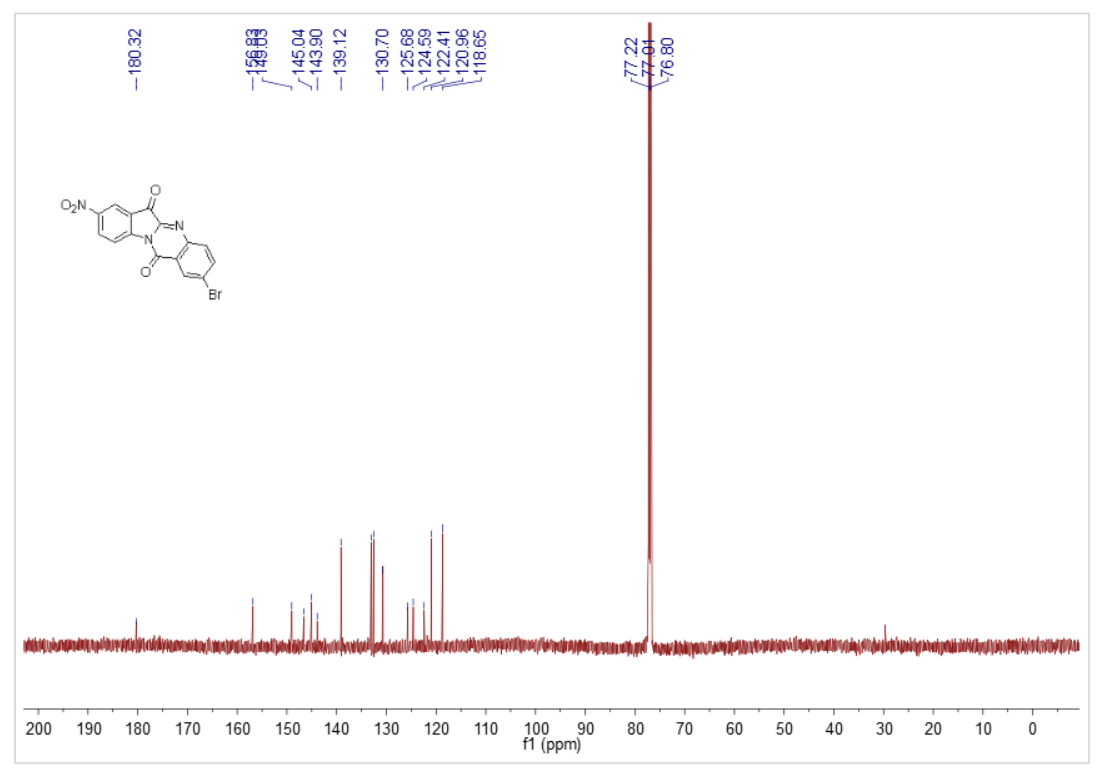


**Figure 15** 13C NMR of compound **3n**


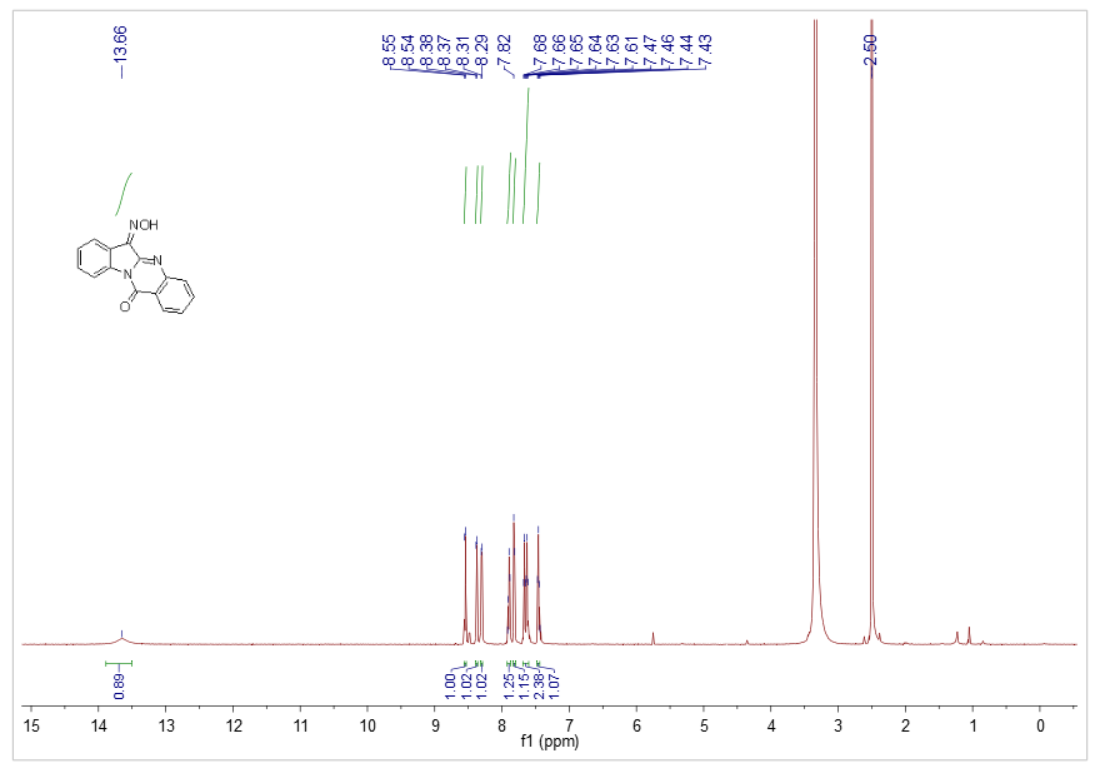


**Figure 16** 1H NMR of compound **4a**


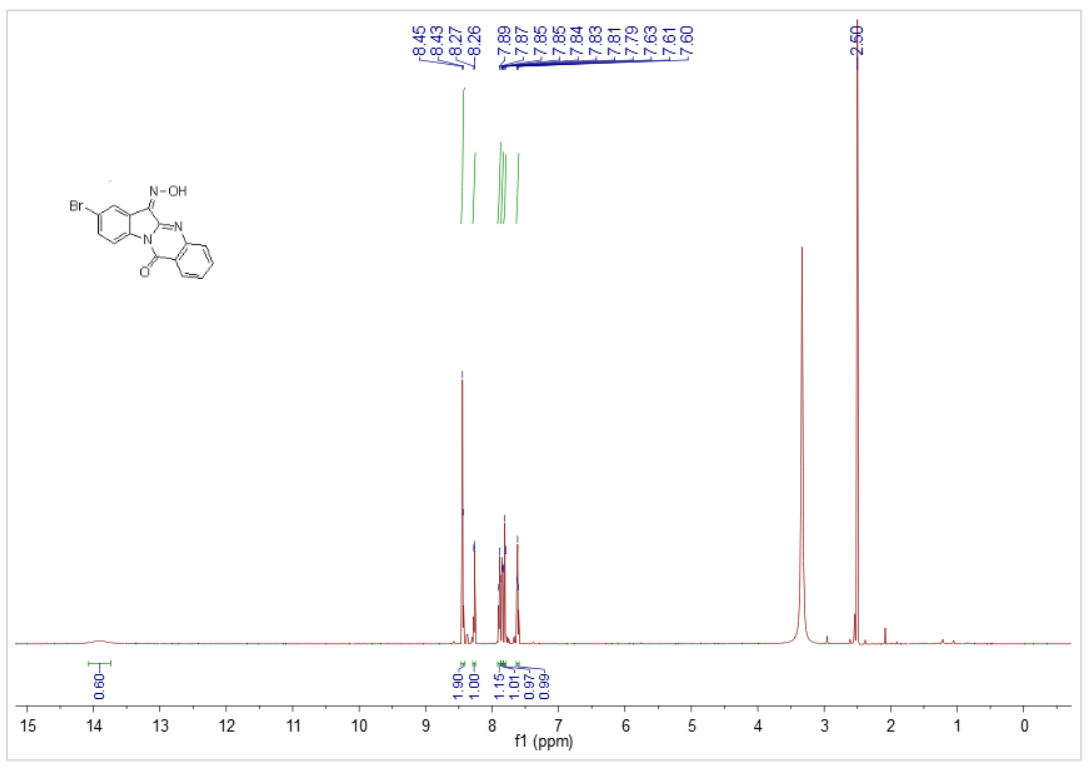


**Figure 17** 1H NMR of compound **4b**


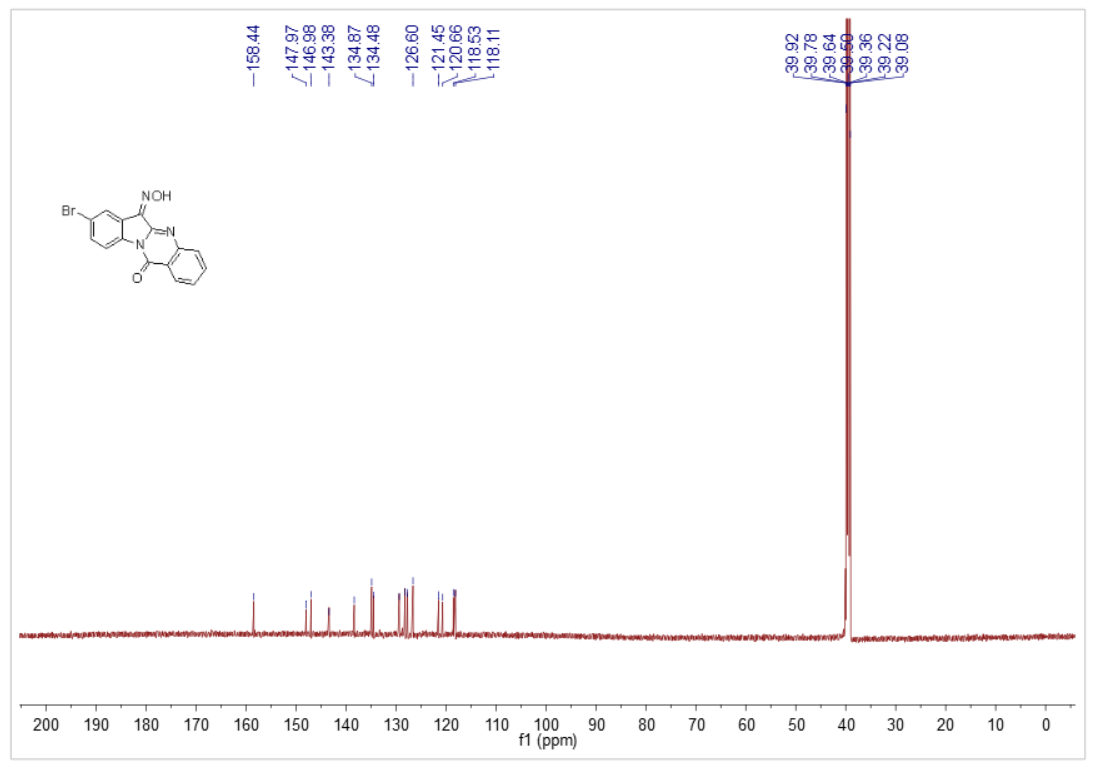


**Figure 18** 13C NMR of compound **4b**


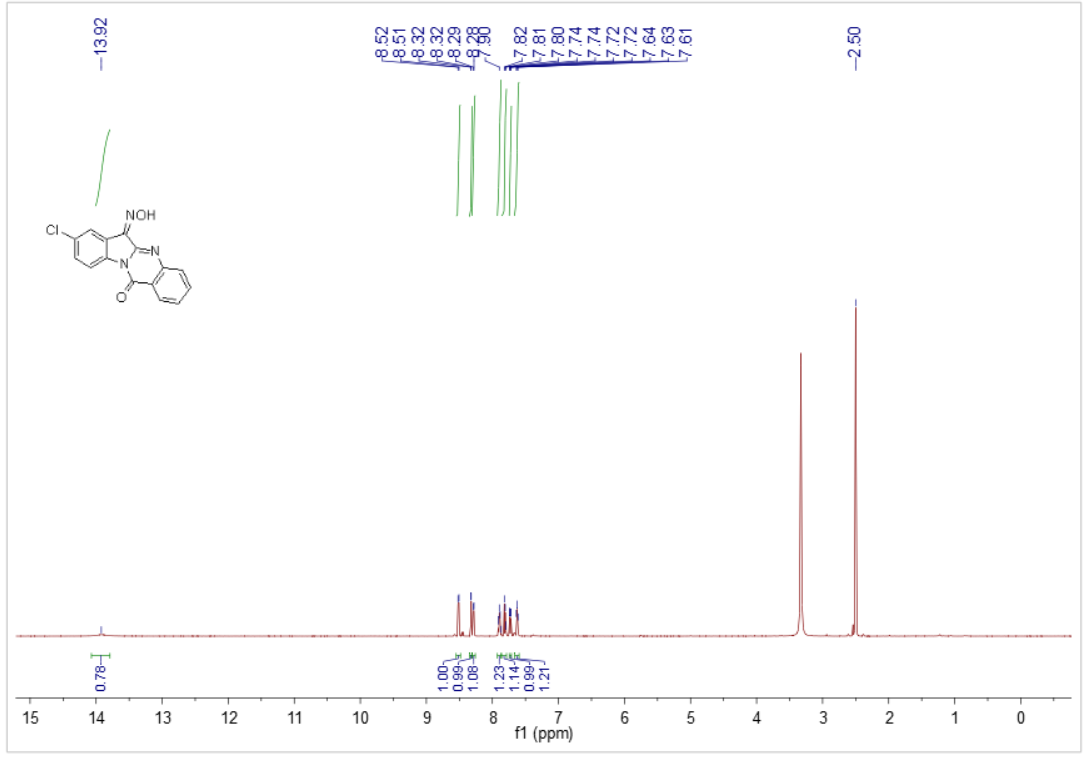


**Figure 19** 1H NMR of compound **4c**


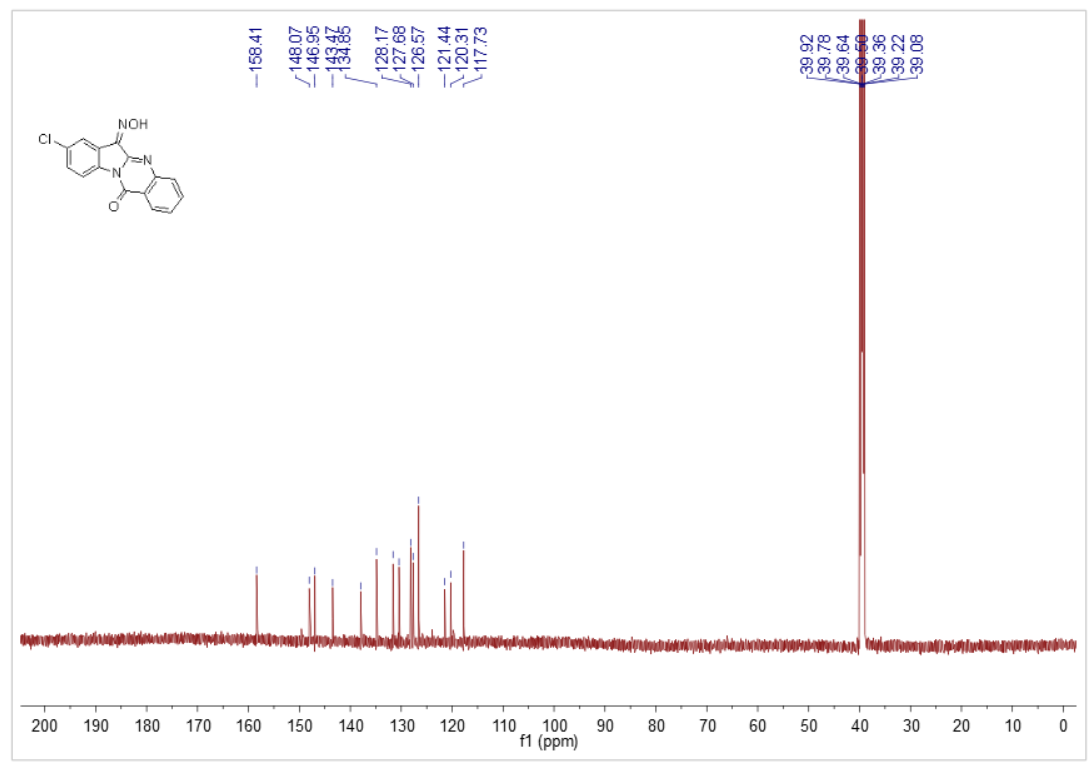


**Figure 20** 13C NMR of compound **4c**


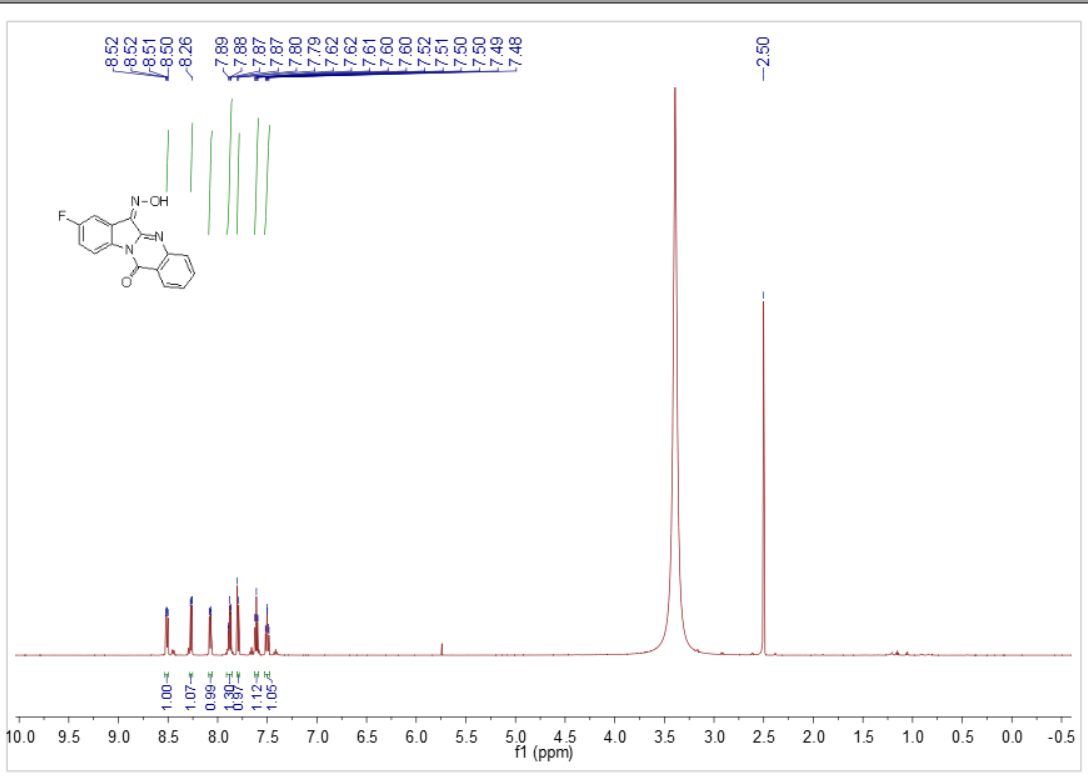


**Figure 21** 1H NMR of compound **4d**


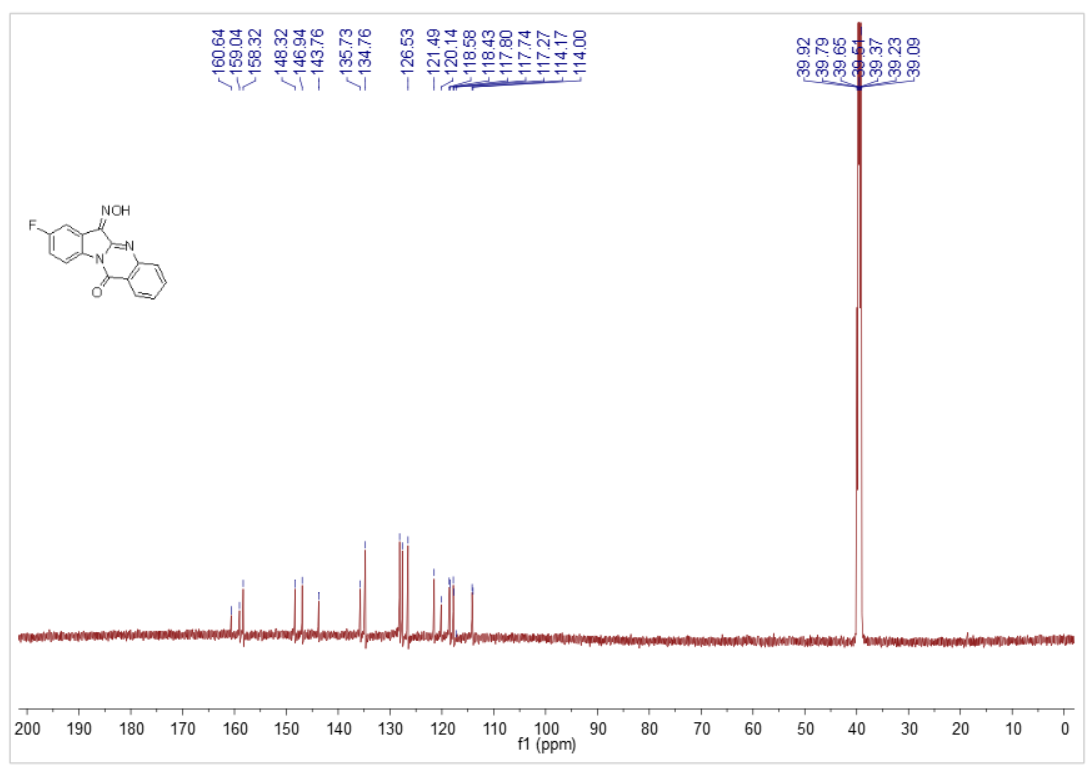


**Figure 22** 13C NMR of compound **4d**


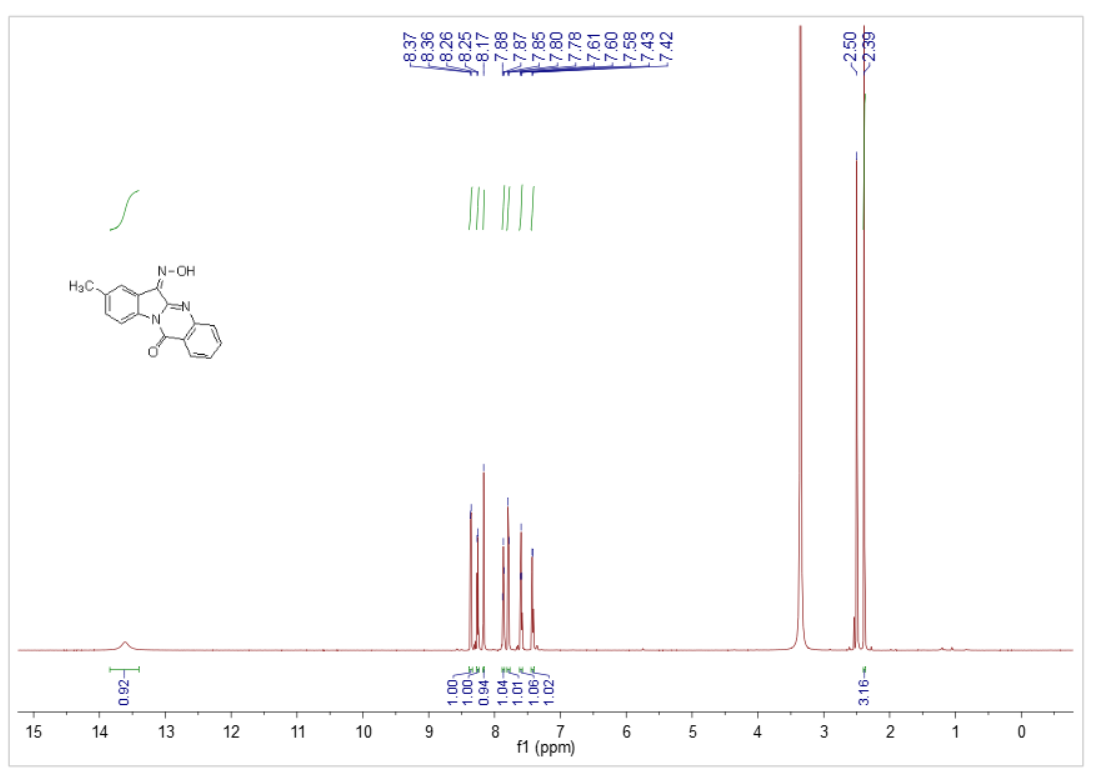


**Figure 23** 1H NMR of compound **4e**


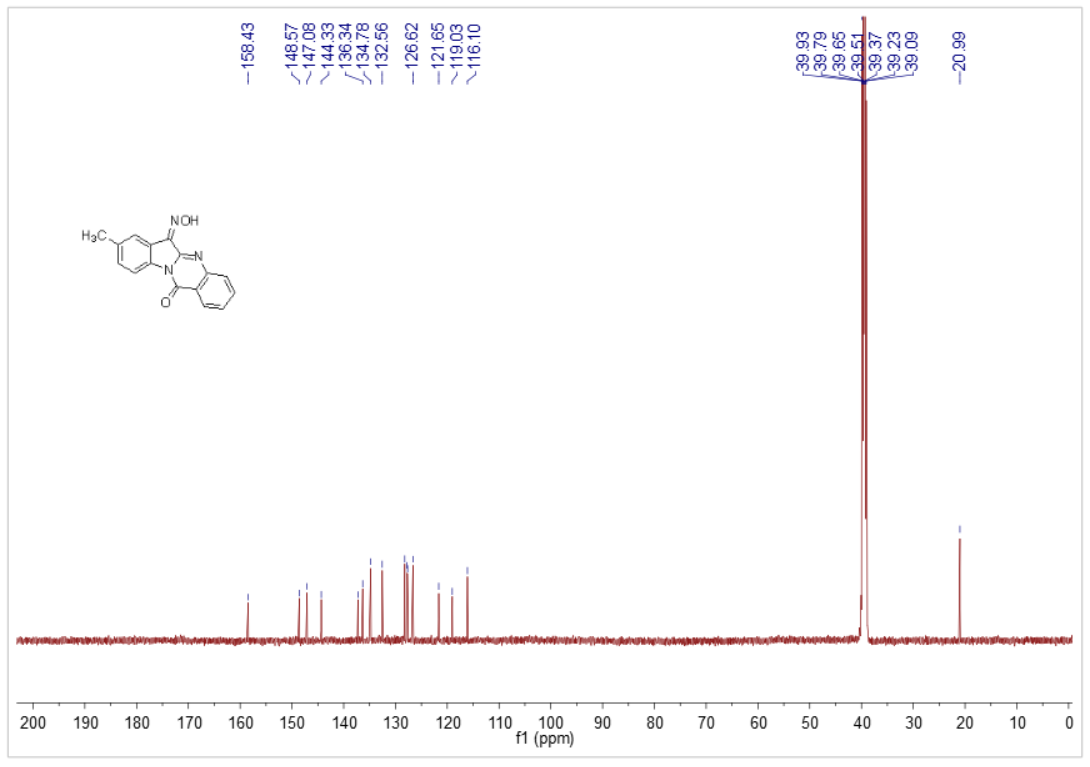


**Figure 24** 13C NMR of compound **4e**


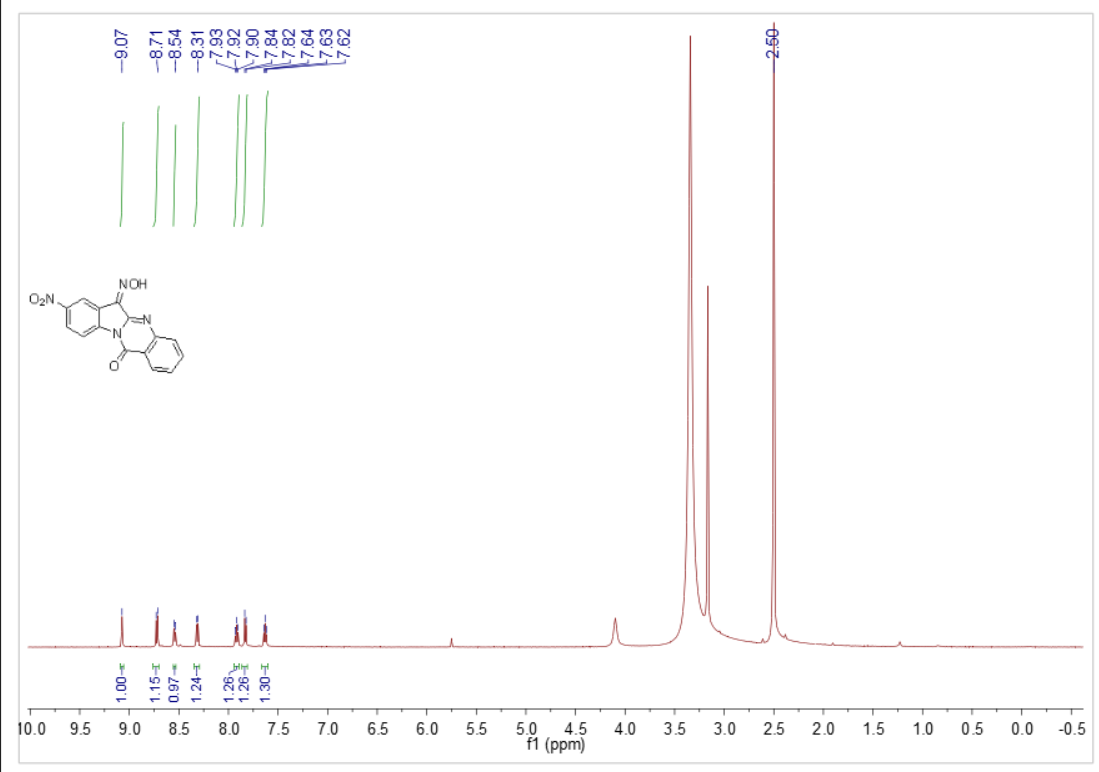


**Figure 25** 1H NMR of compound **4f**


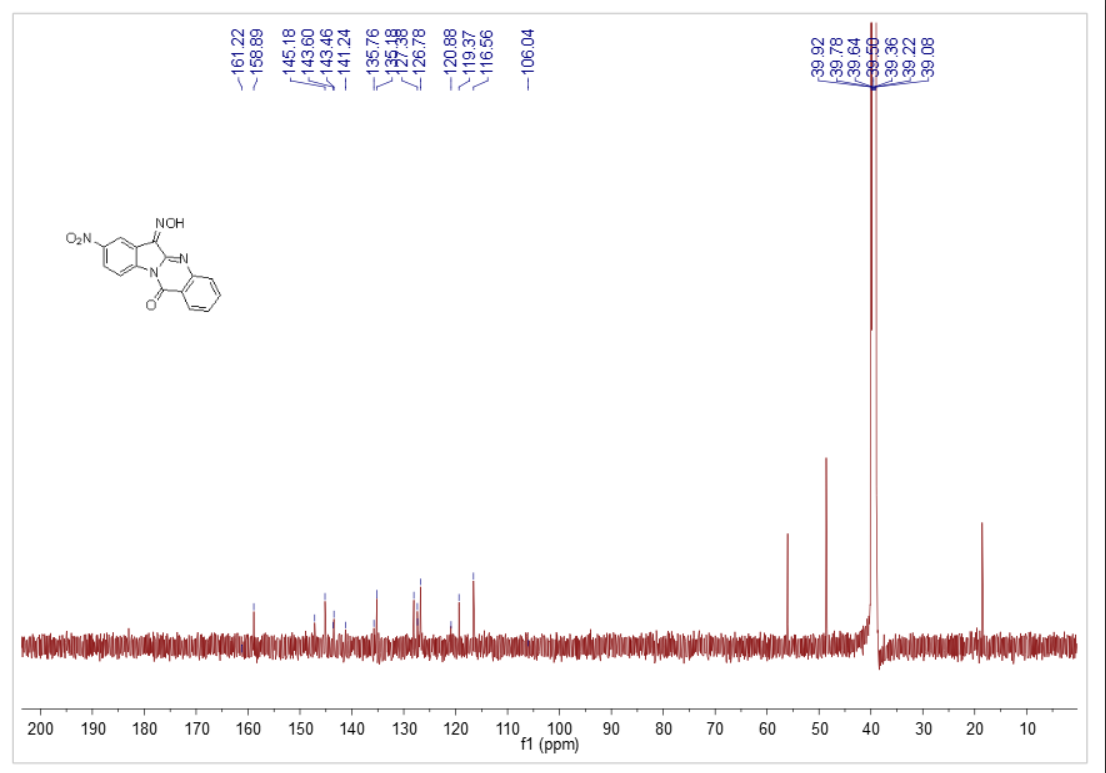


**Figure 26** 13C NMR of compound **4f**


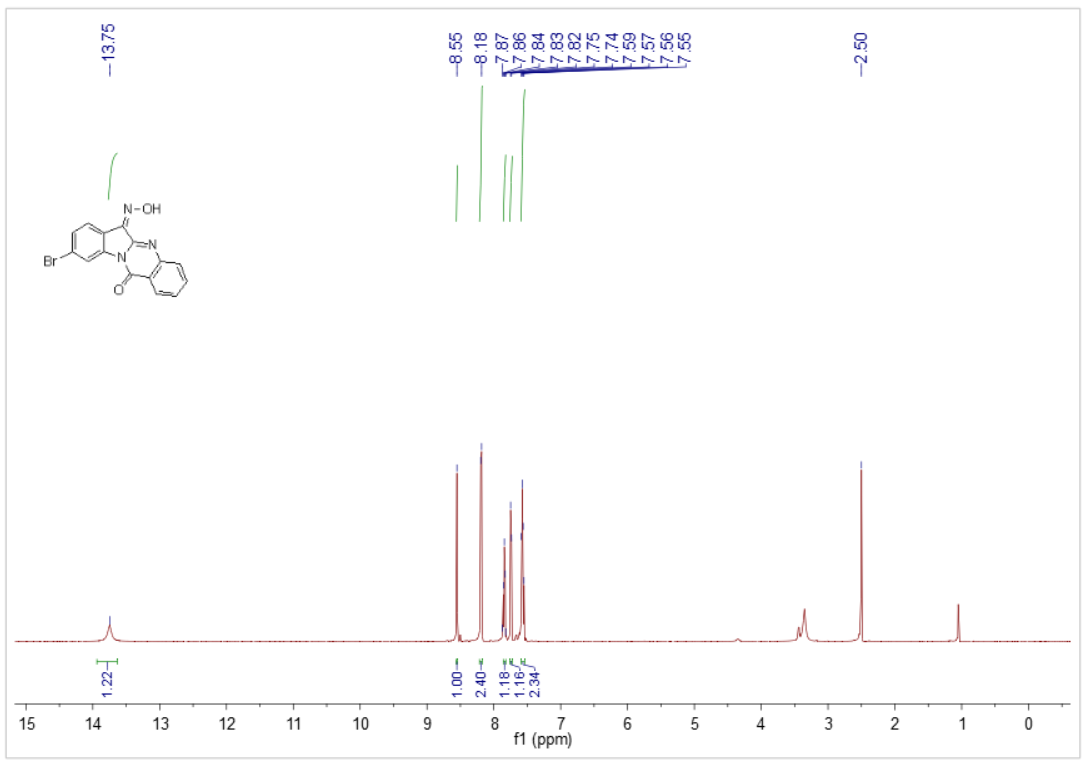


**Figure 27** 1H NMR of compound **4g**


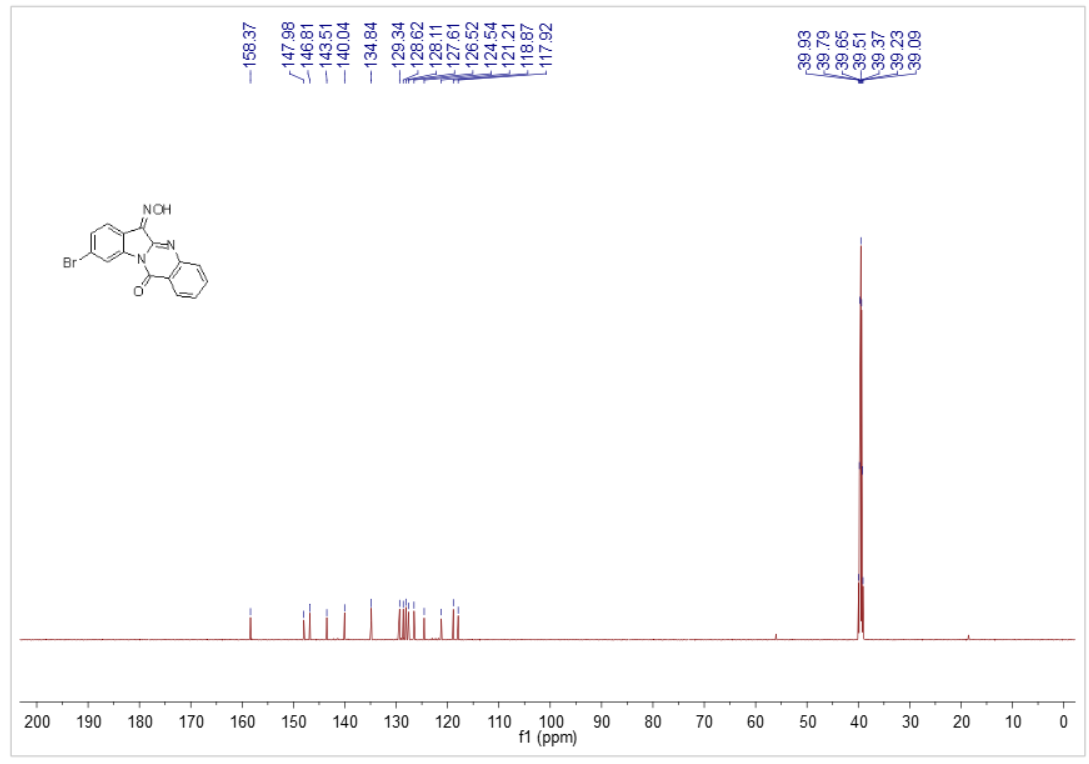


**Figure 28** 13C NMR of compound **4g**


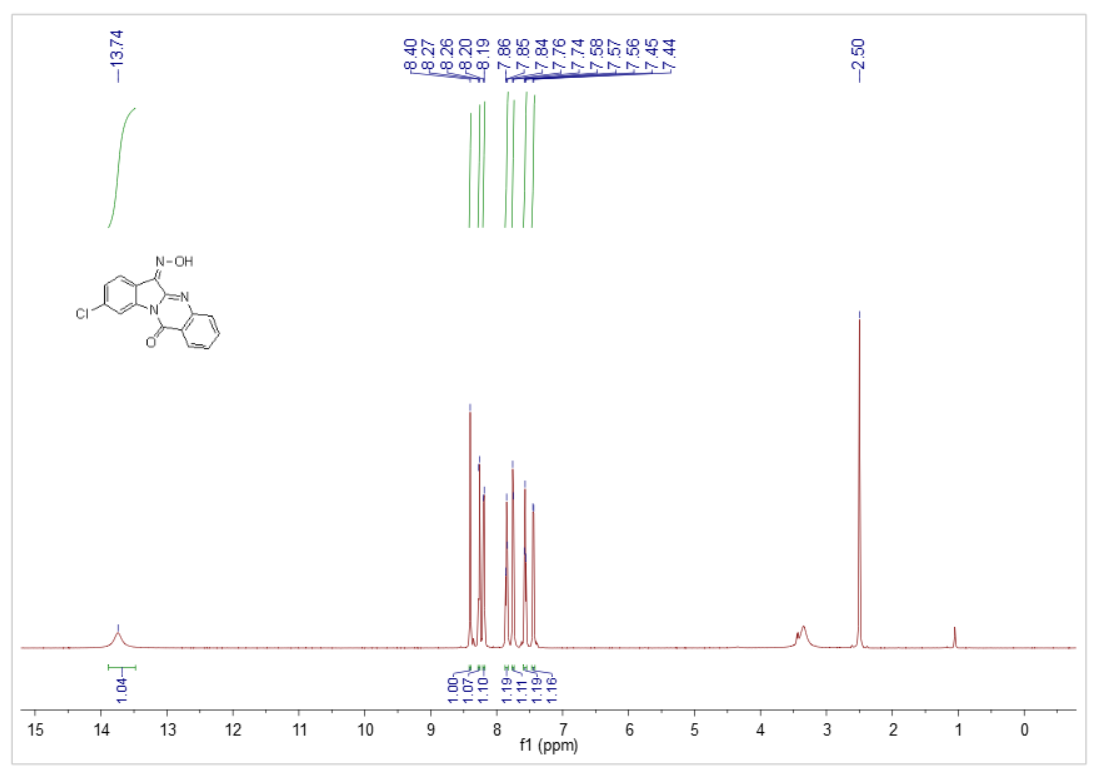


**Figure 29** 1H NMR of compound **4h**


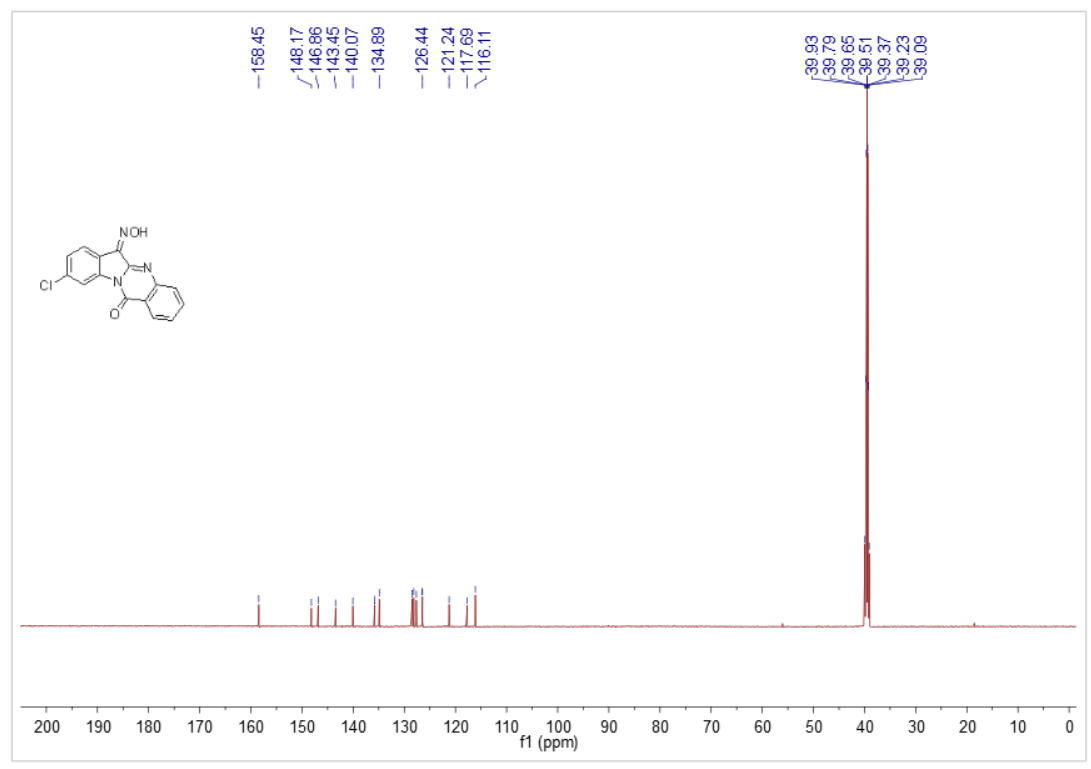


**Figure 30** 13C NMR of compound **4h**


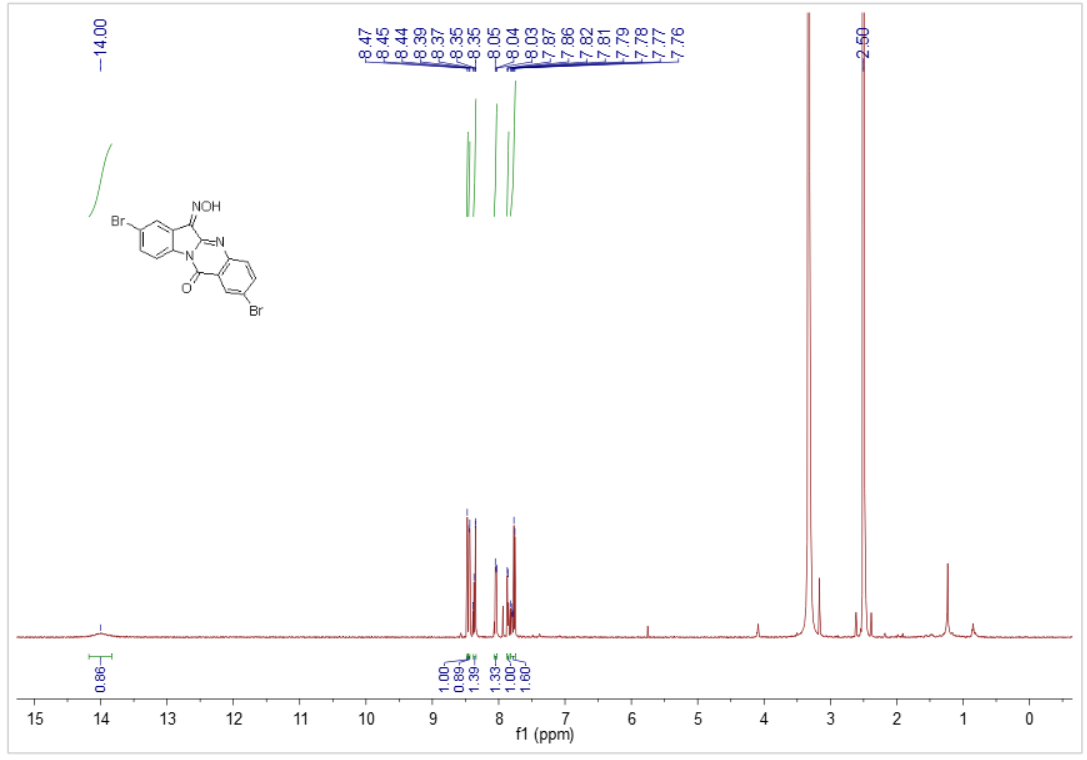


**Figure 31** 1H NMR of compound **4i**


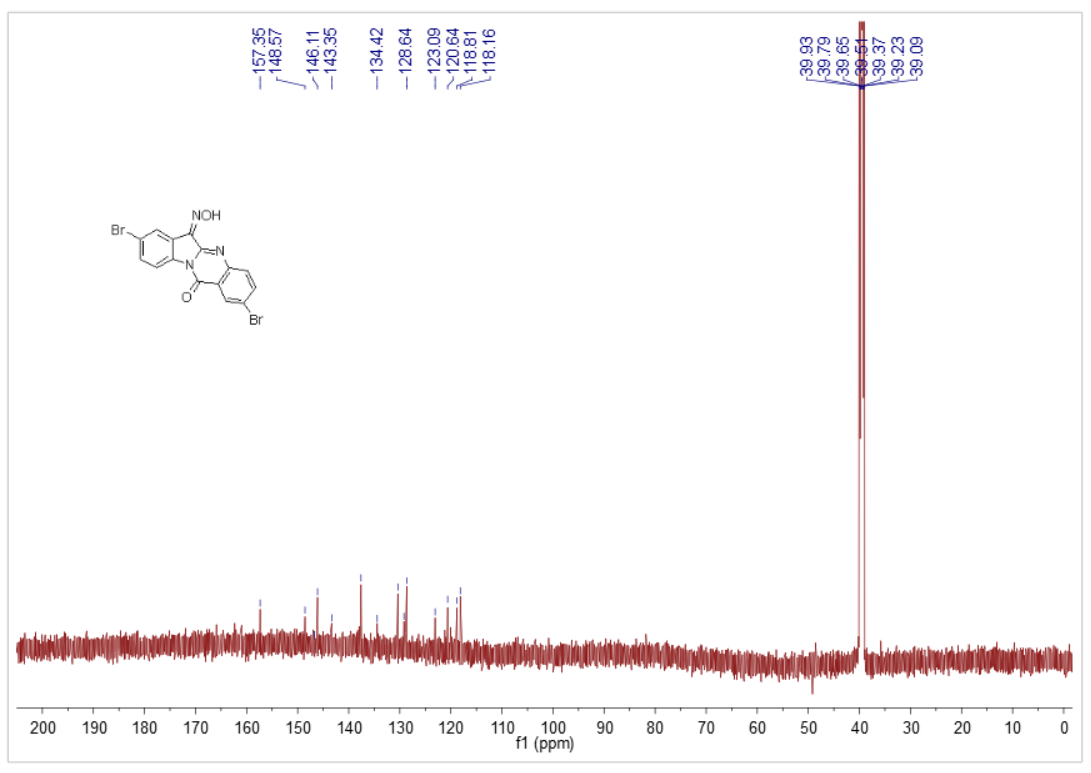


**Figure 32** 13C NMR of compound **4i**


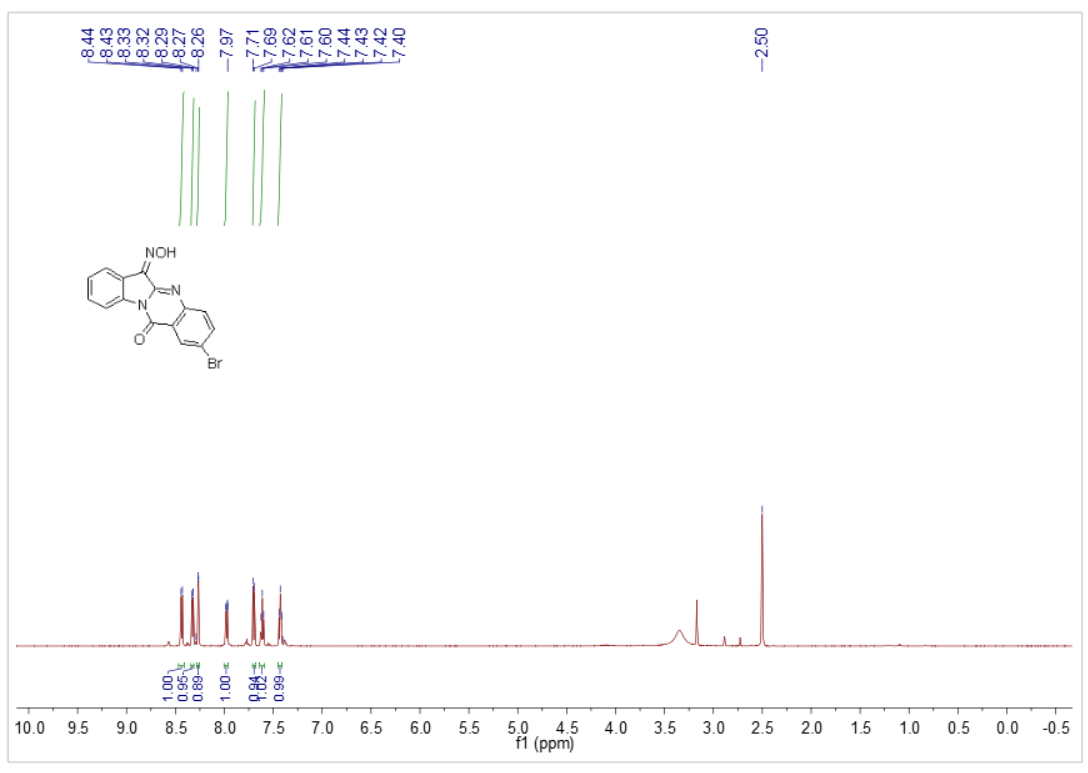


**Figure 33** 1H NMR of compound **4j**


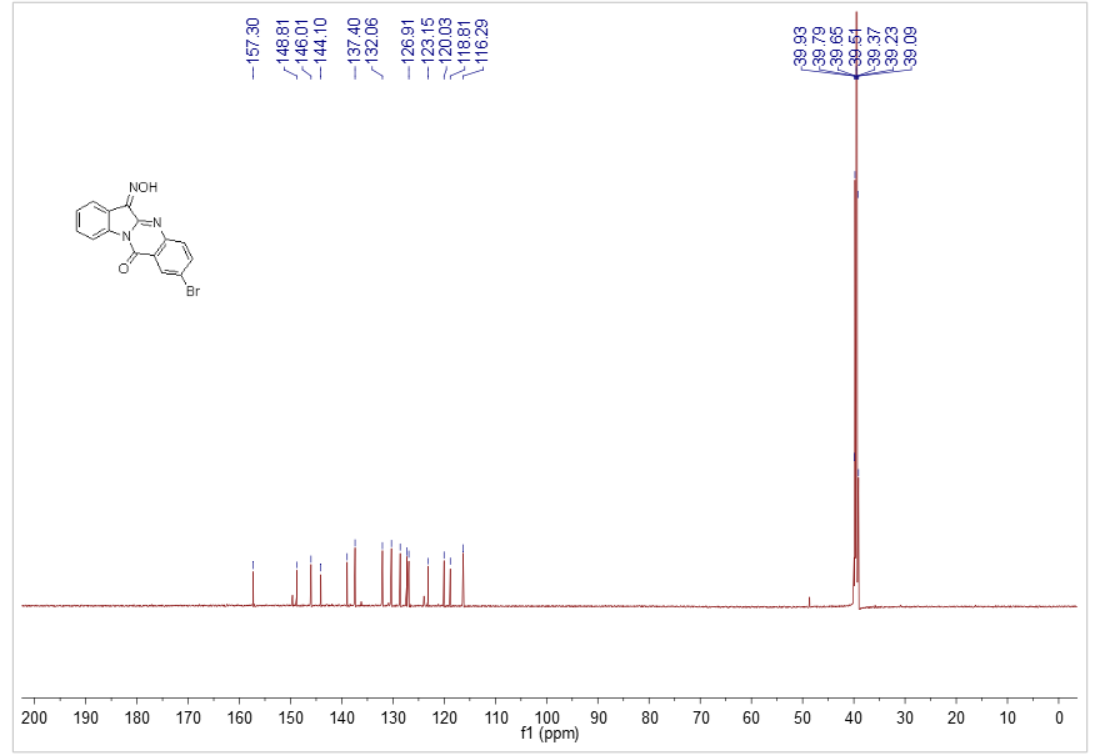


**Figure 34** 13C NMR of compound **4j**


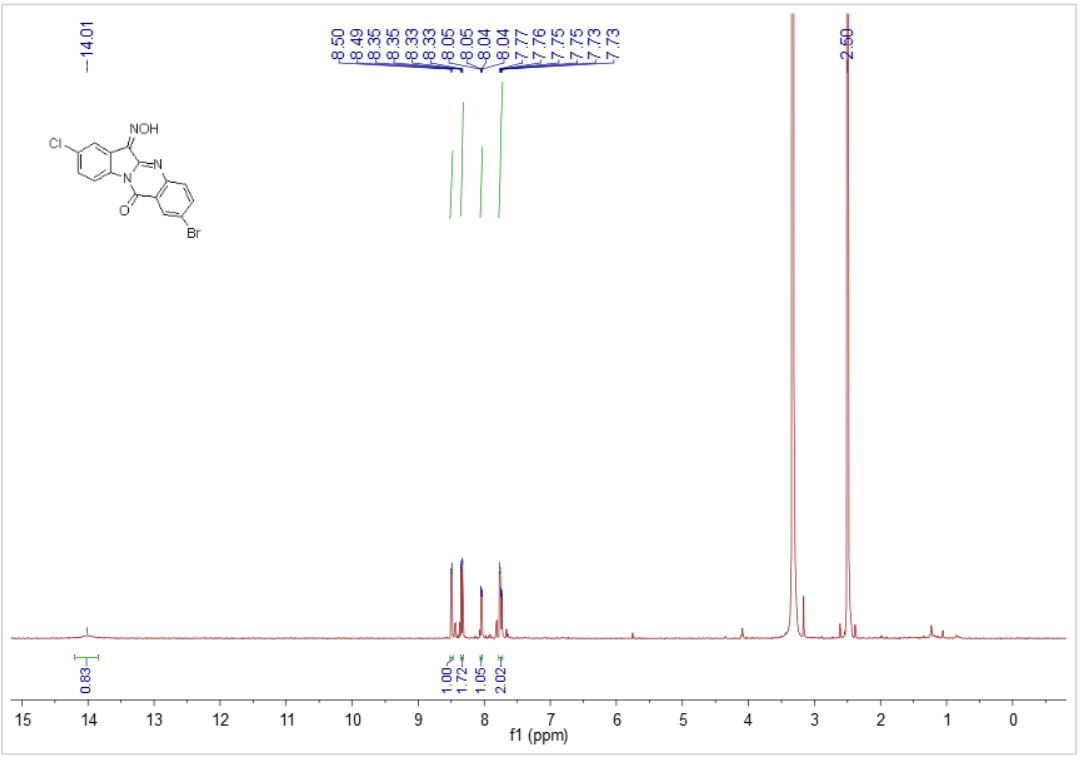


**Figure 35** 1H NMR of compound **4k**


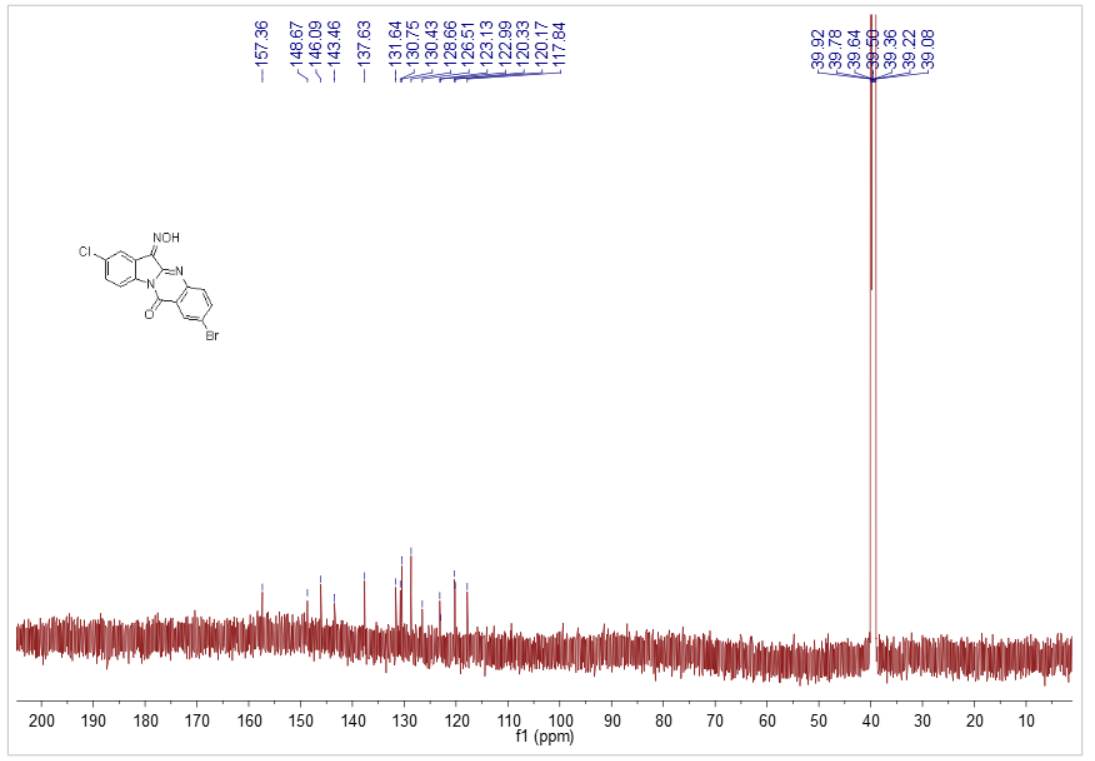


**Figure 36** 13C NMR of compound **4k**


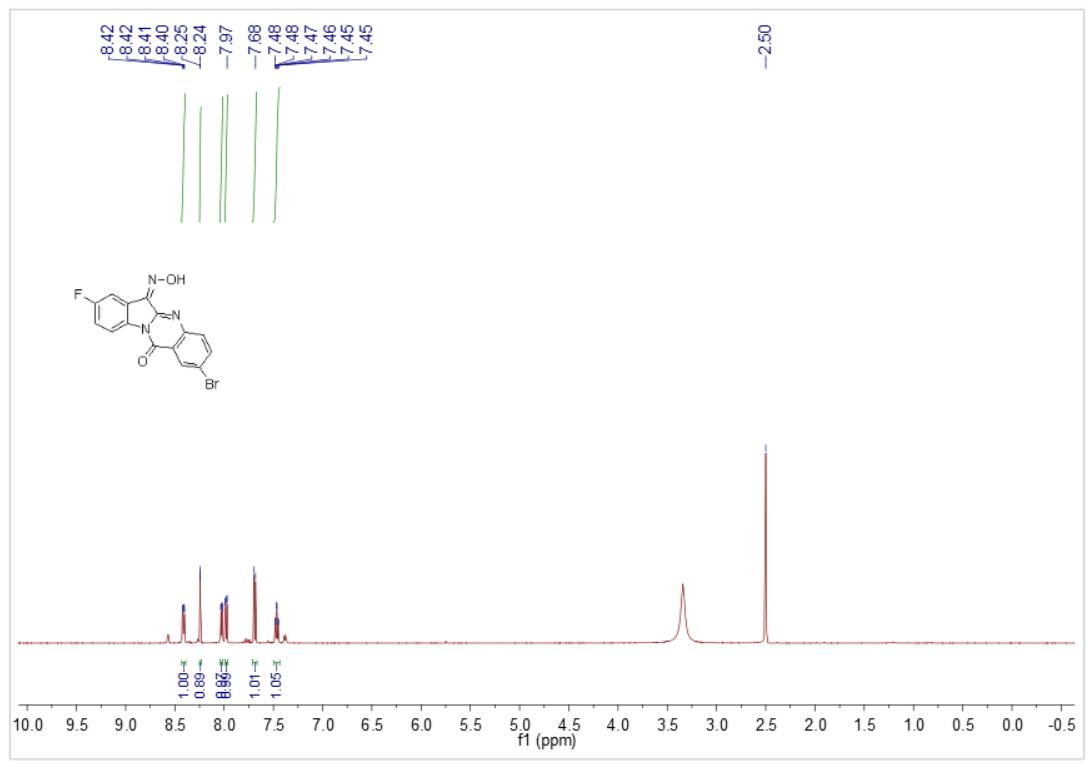


**Figure 37** 1H NMR of compound **4l**


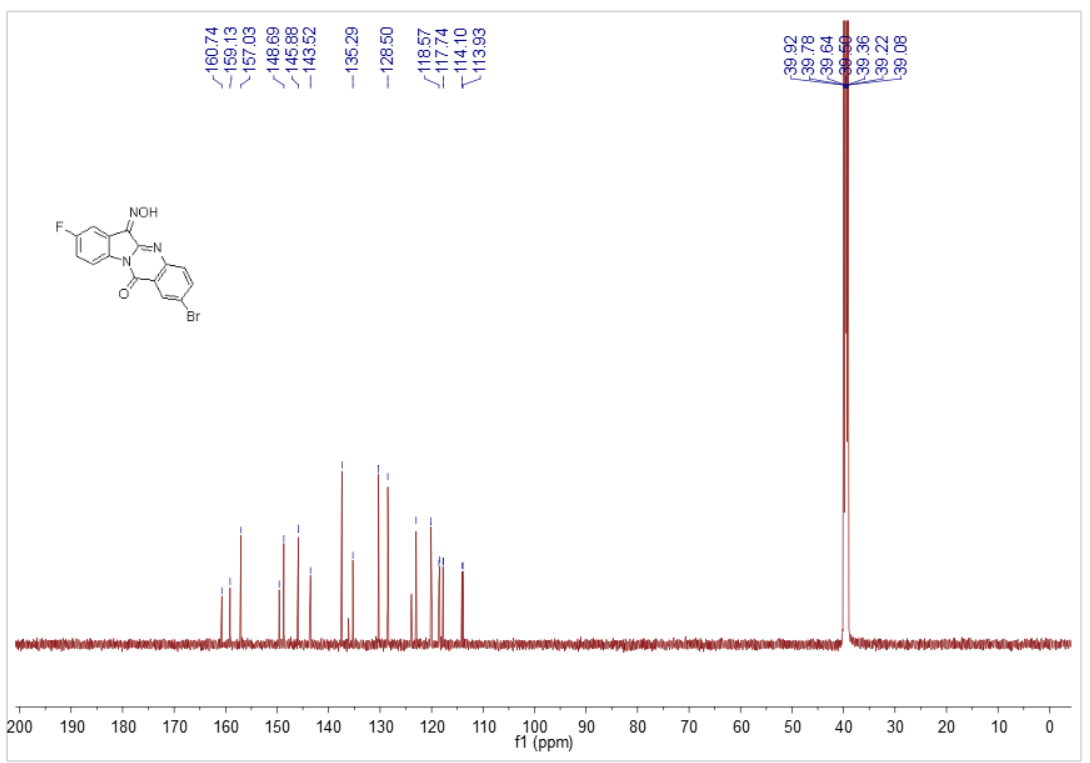


**Figure 38** 13C NMR of compound **4l**


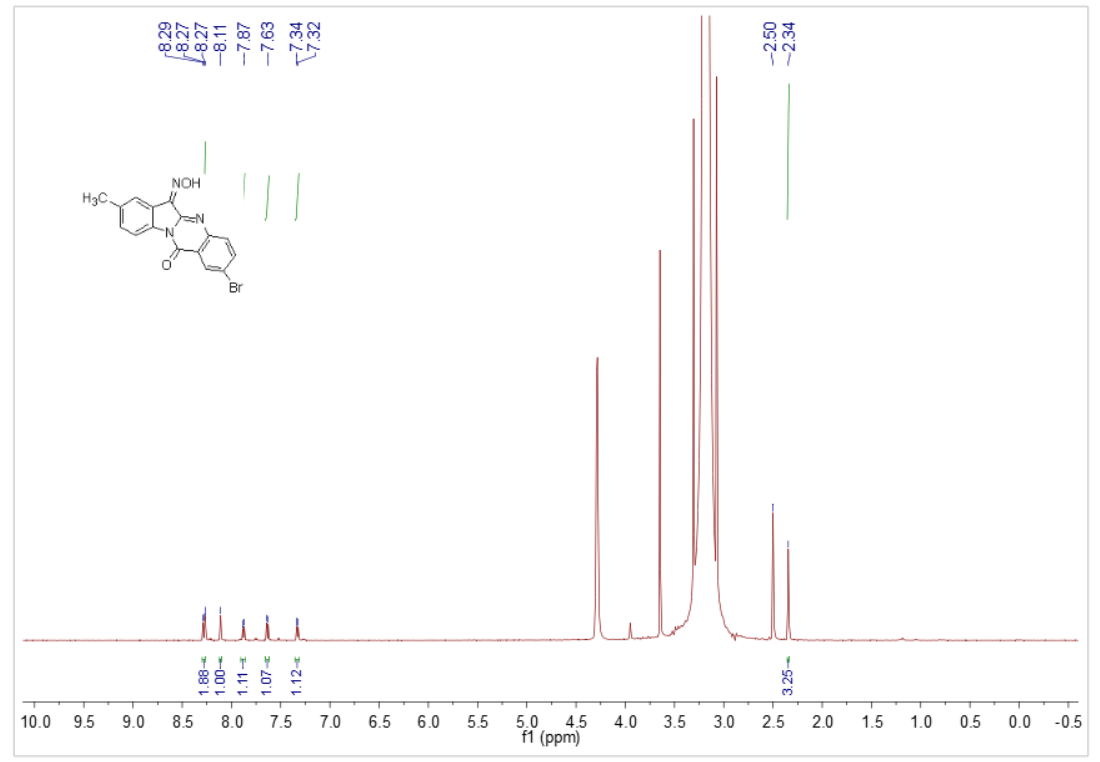


**Figure 39** 1H NMR of compound **4m**


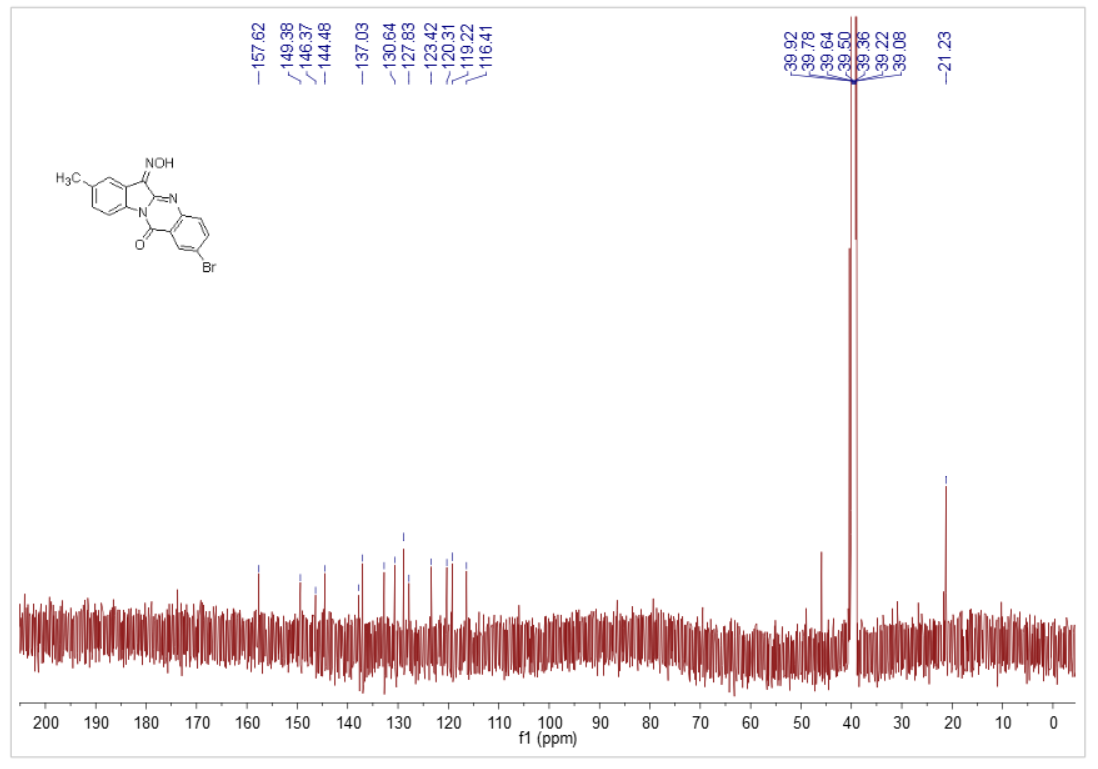


**Figure 40** 13C NMR of compound **4m**


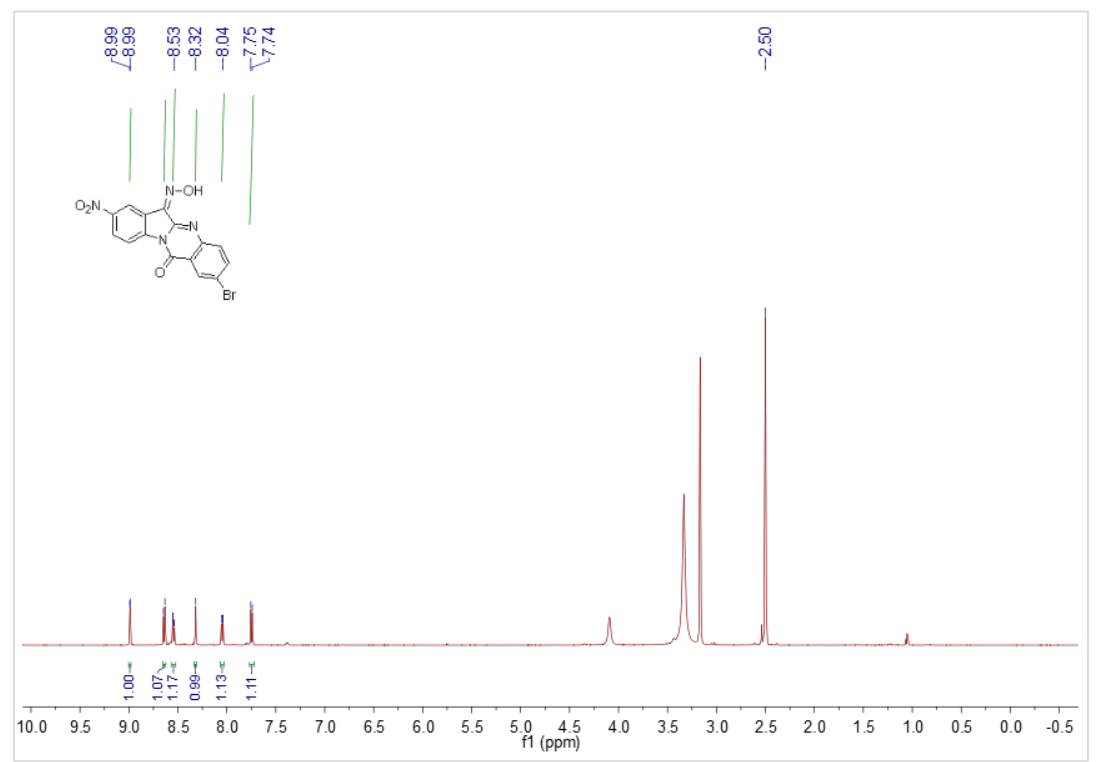


**Figure 41** 1H NMR of compound **4n**


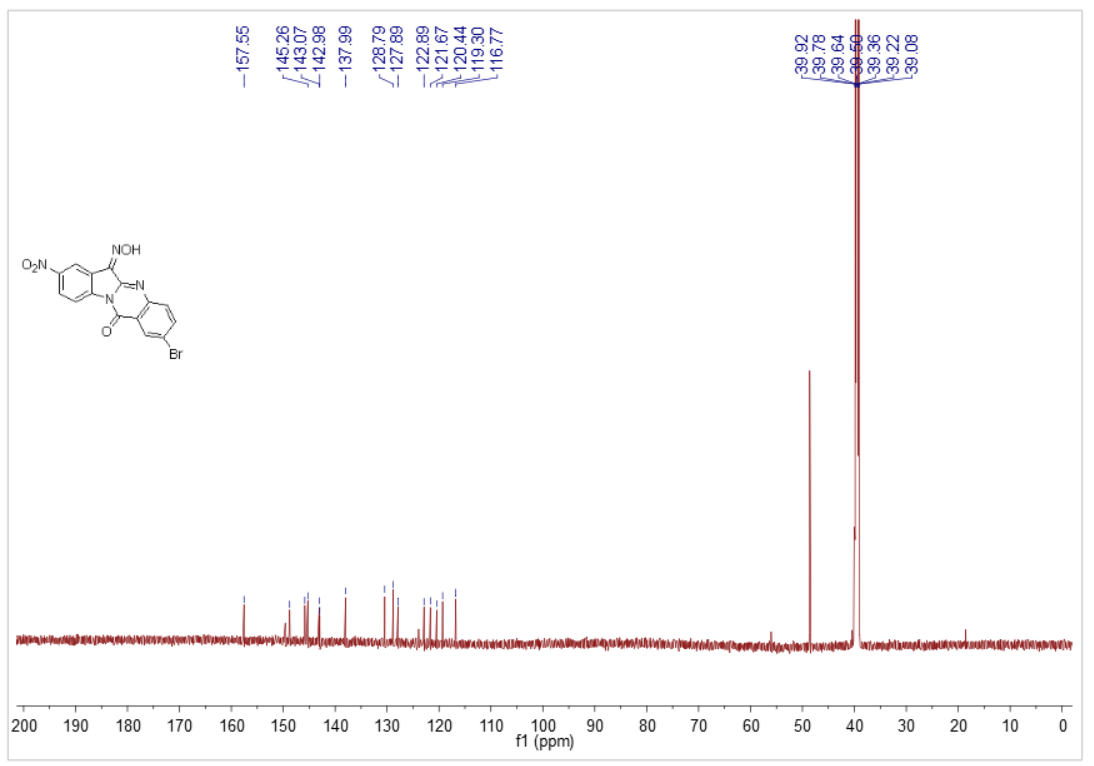


**Figure 42** 13C NMR of compound **4n**


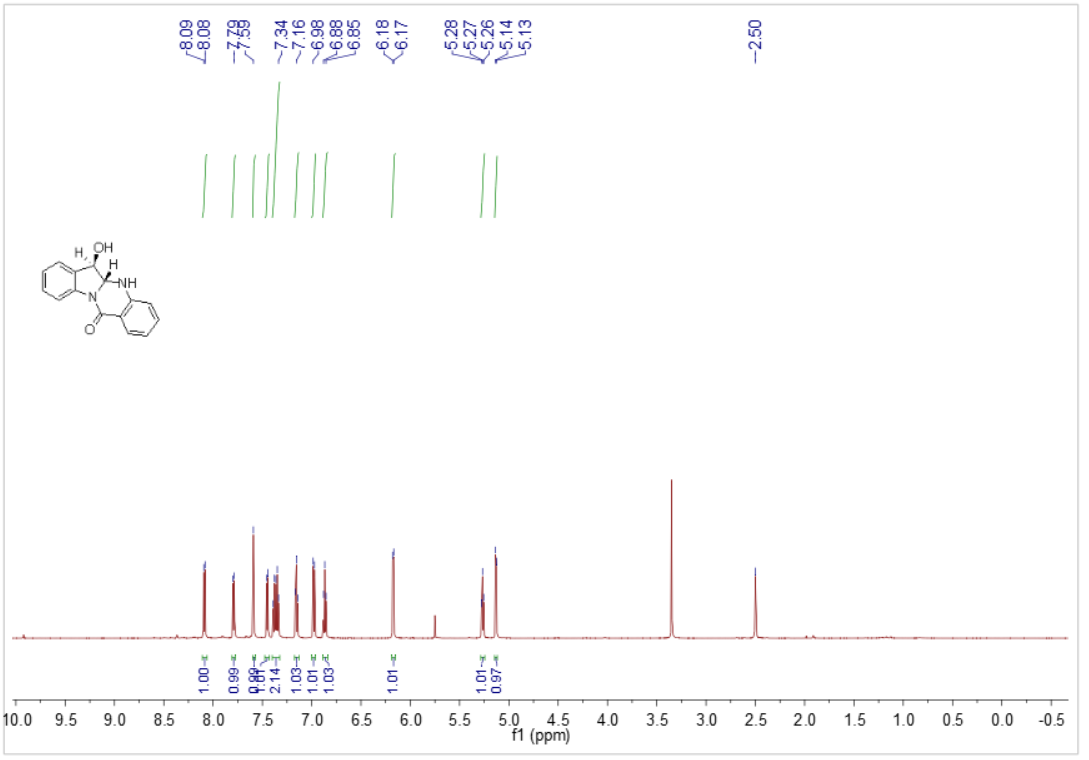


**Figure 43** 1H NMR of compound **5a**


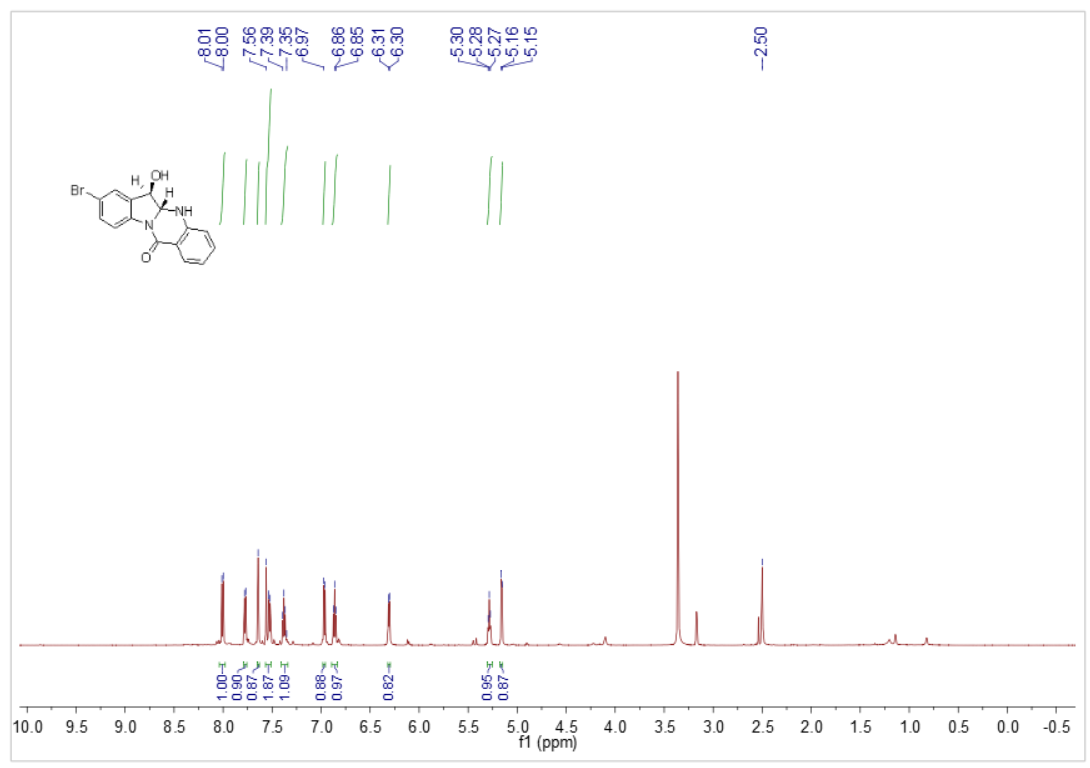


**Figure 44** 1H NMR of compound **5b**


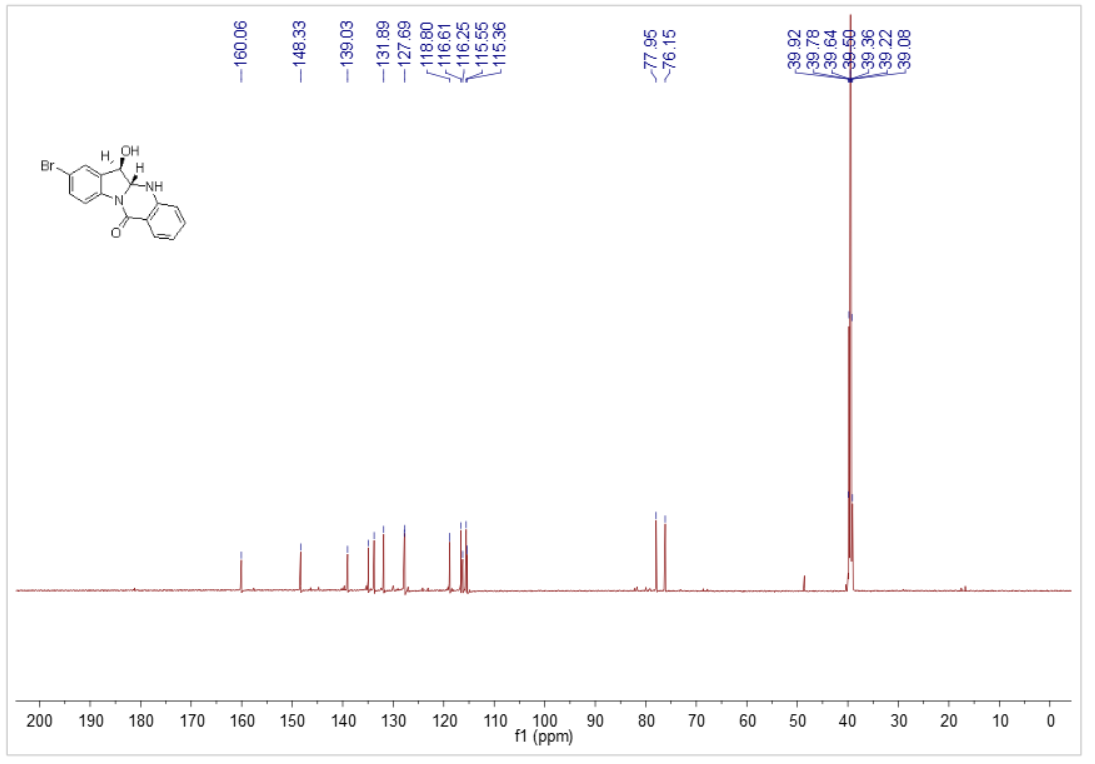


**Figure 45** 13C NMR of compound **5b**


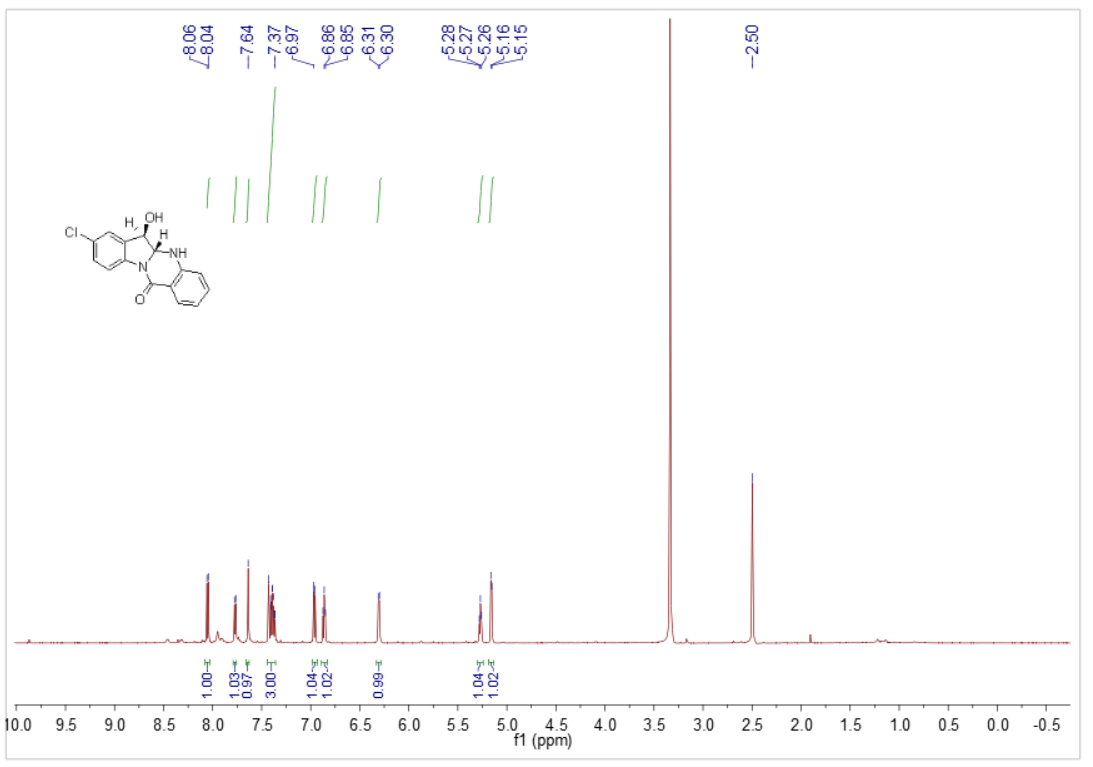


**Figure 46** 1H NMR of compound **5c**


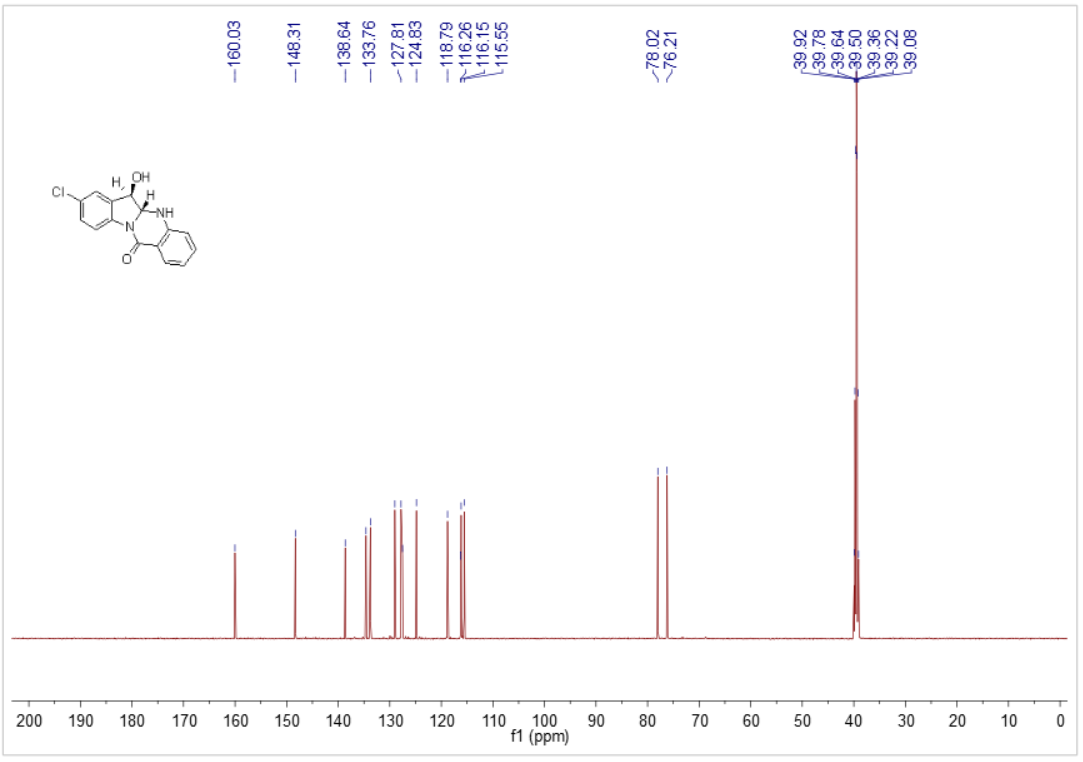


**Figure 47** 13C NMR of compound **5c**


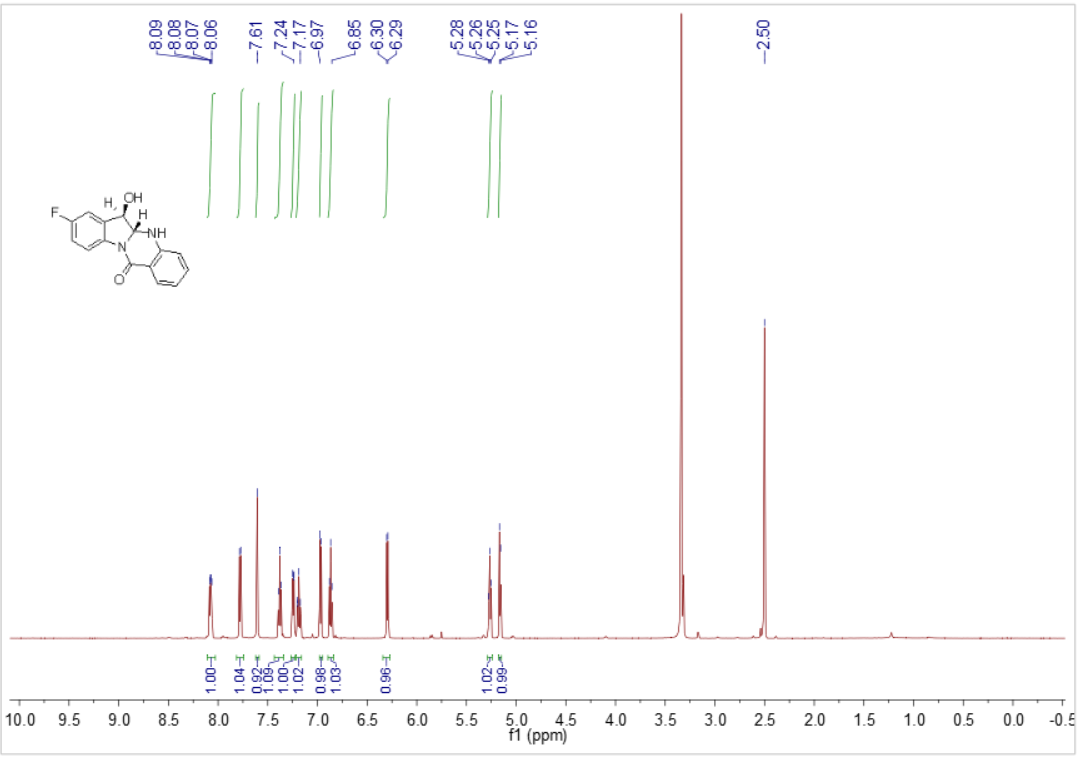


**Figure 48** 1H NMR of compound **5d**


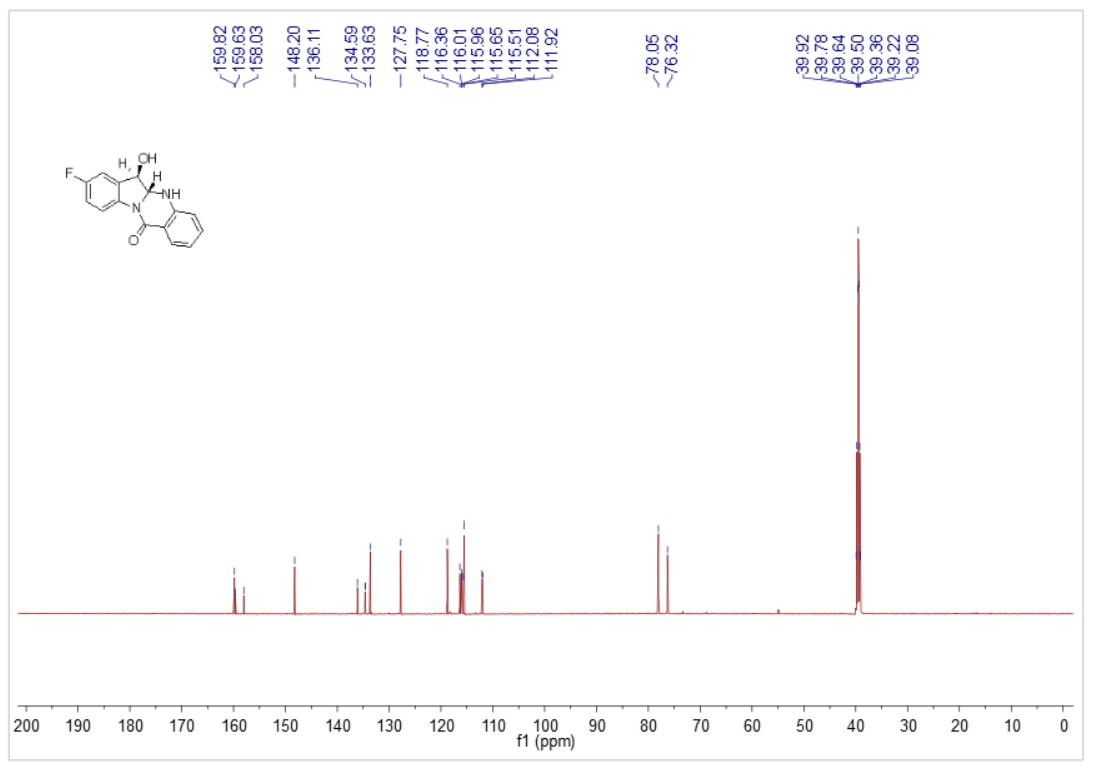


**Figure 49** 13C NMR of compound **5d**


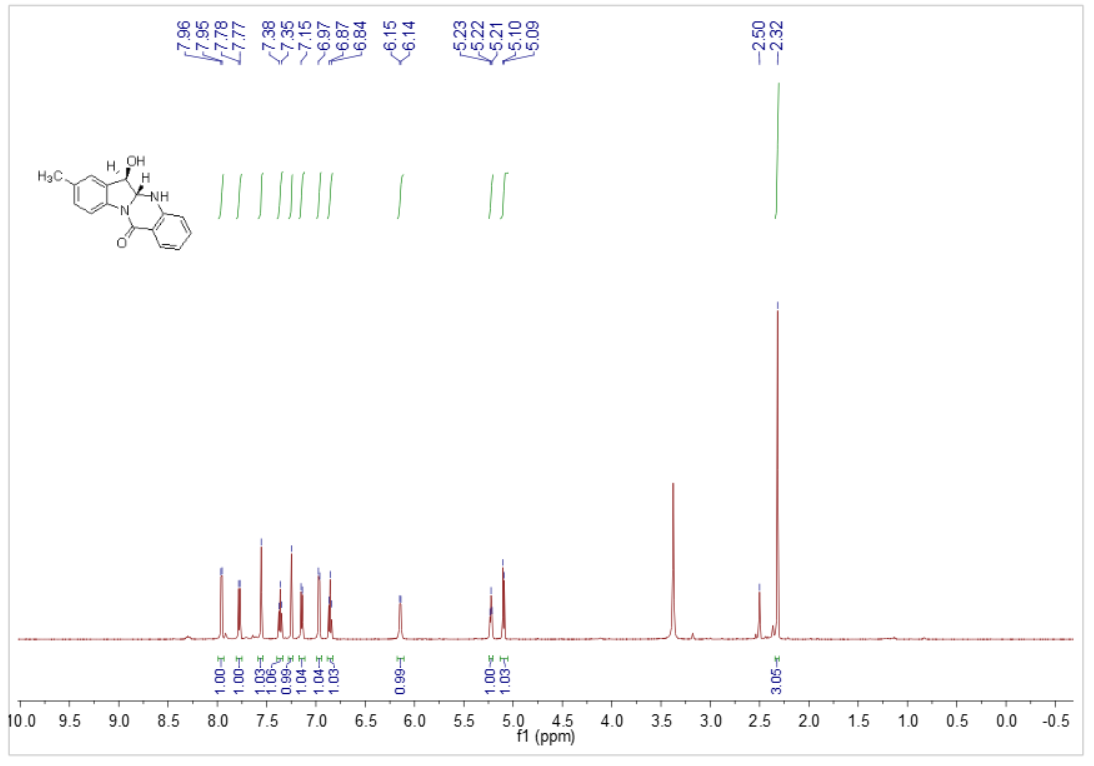


**Figure 50** 1H NMR of compound **5e**


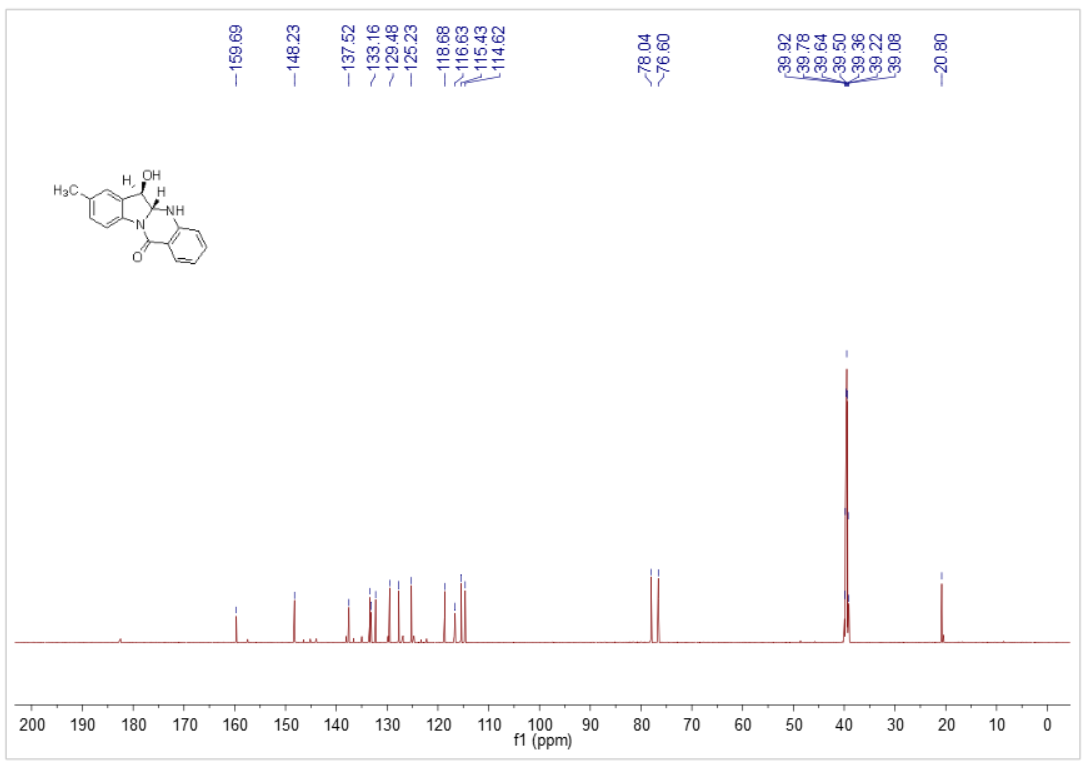


**Figure 51** 13C NMR of compound **5e**


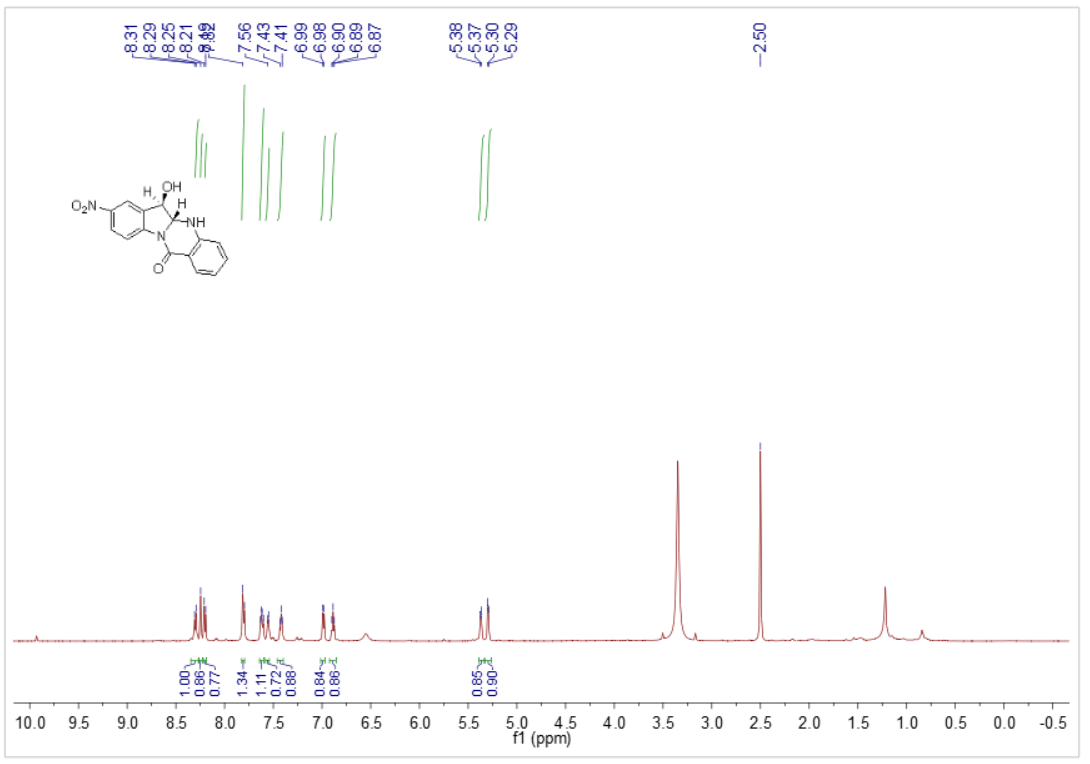


**Figure 52** 1H NMR of compound **5f**


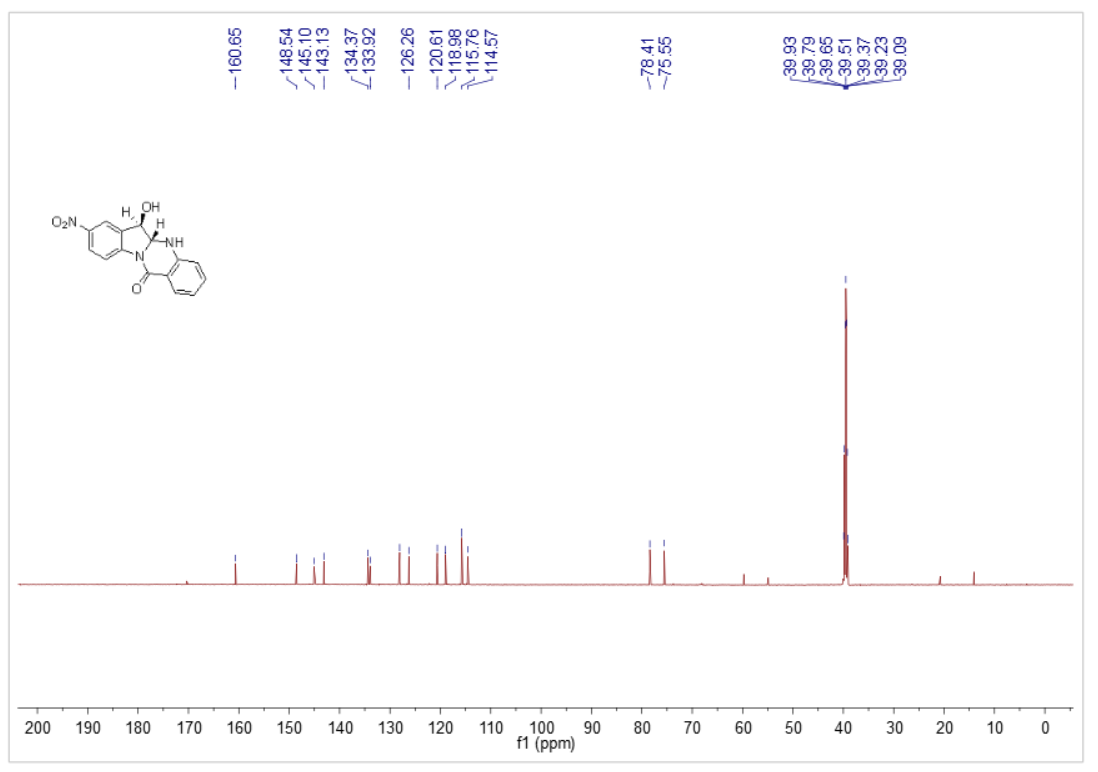


**Figure 53** 13C NMR of compound **5f**


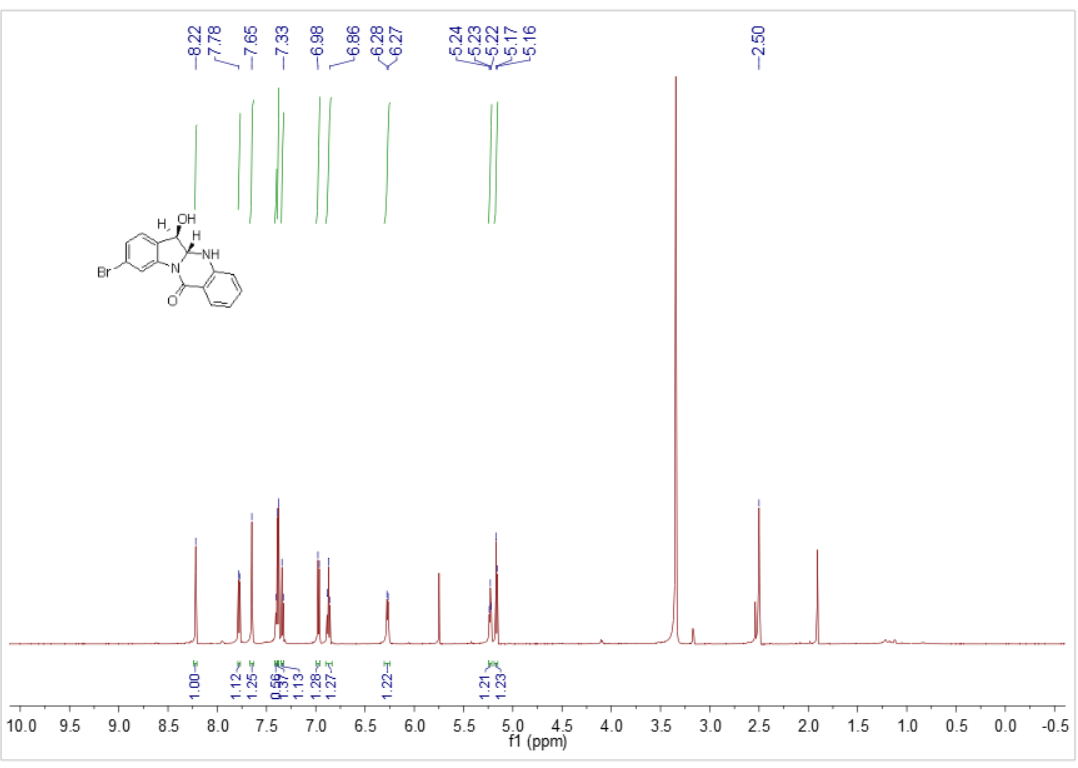


**Figure 54** 1H NMR of compound **5g**


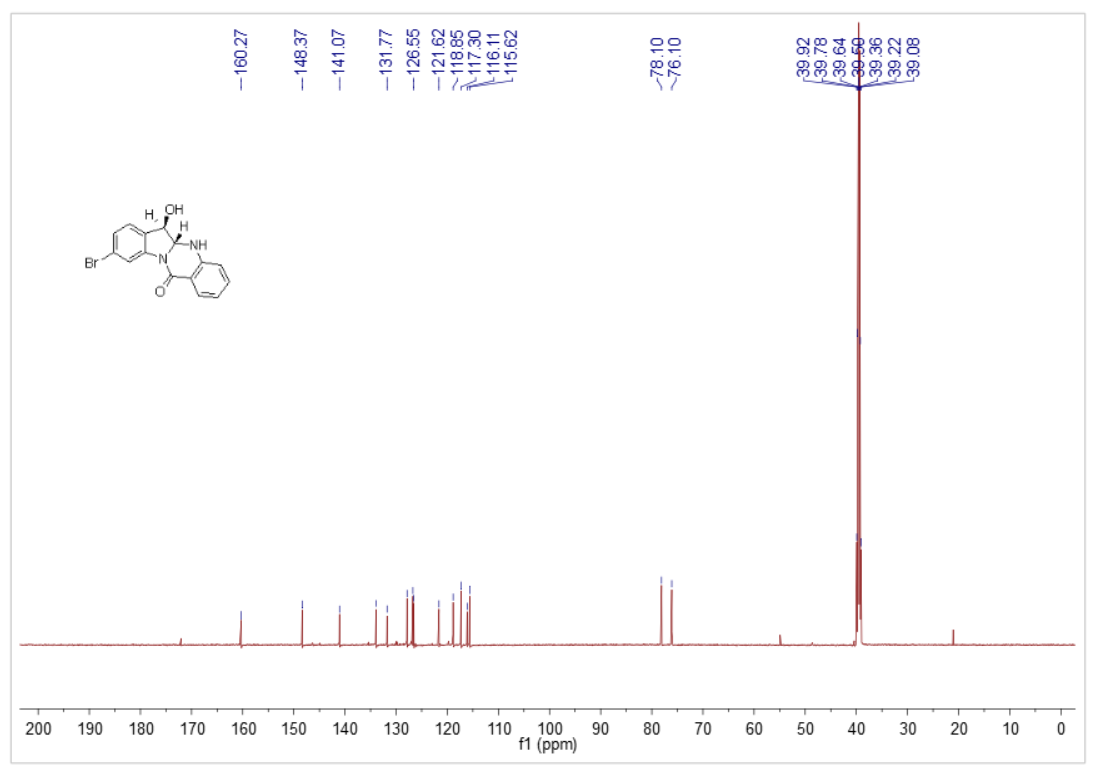


**Figure 55** 13C NMR of compound **5g**


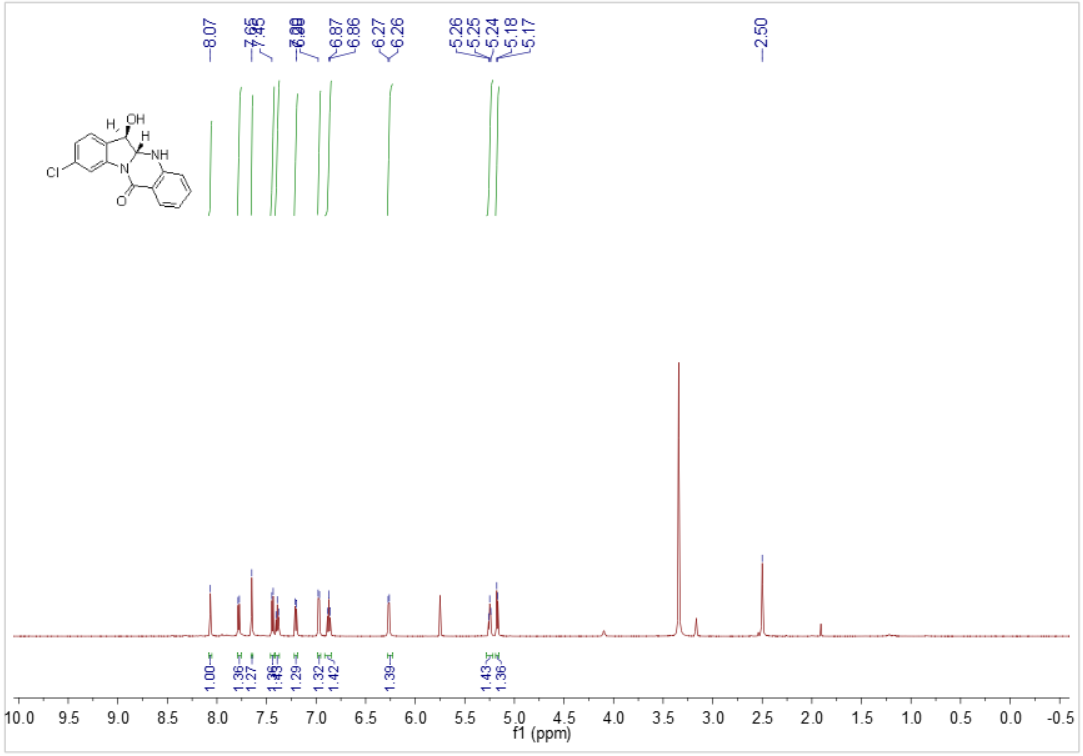


**Figure 56** 1H NMR of compound **5h**


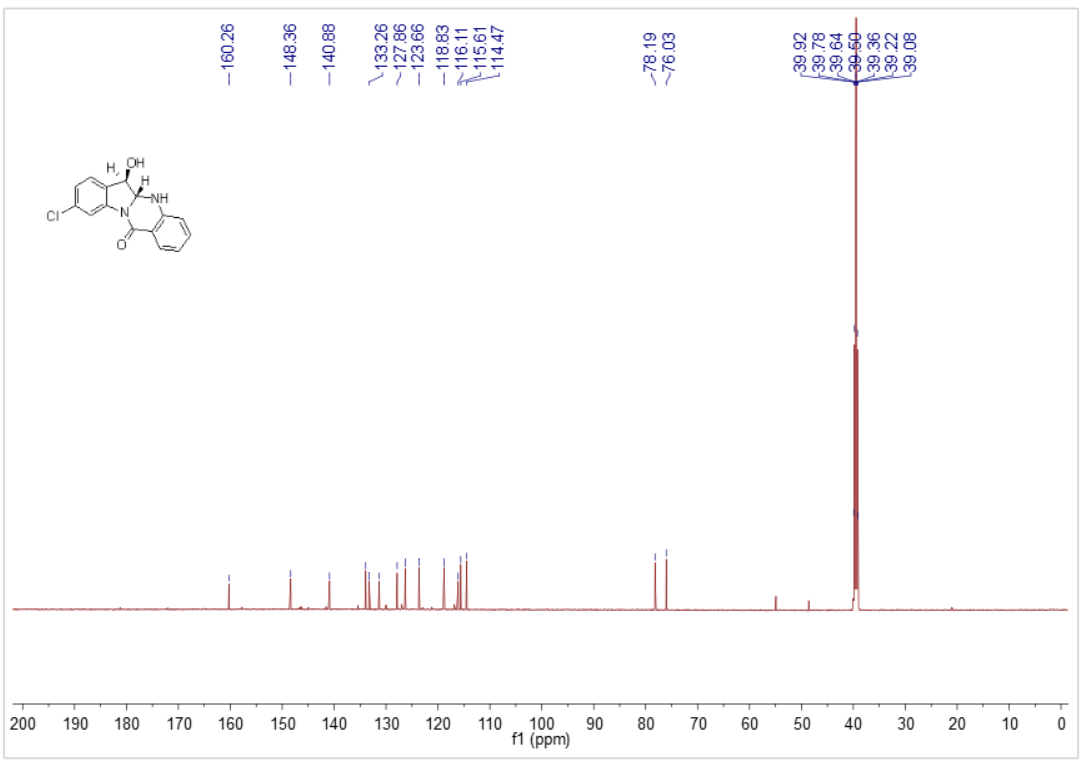


**Figure 57** 13C NMR of compound **5h**


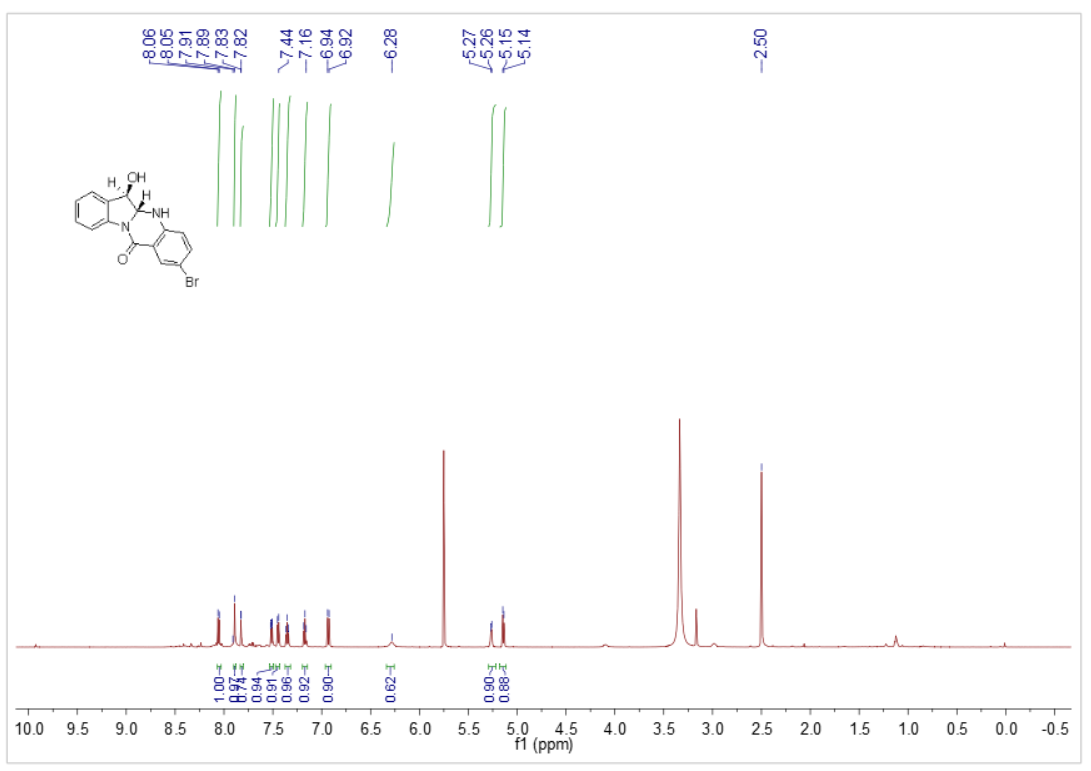


**Figure 58** 1H NMR of compound **5j**


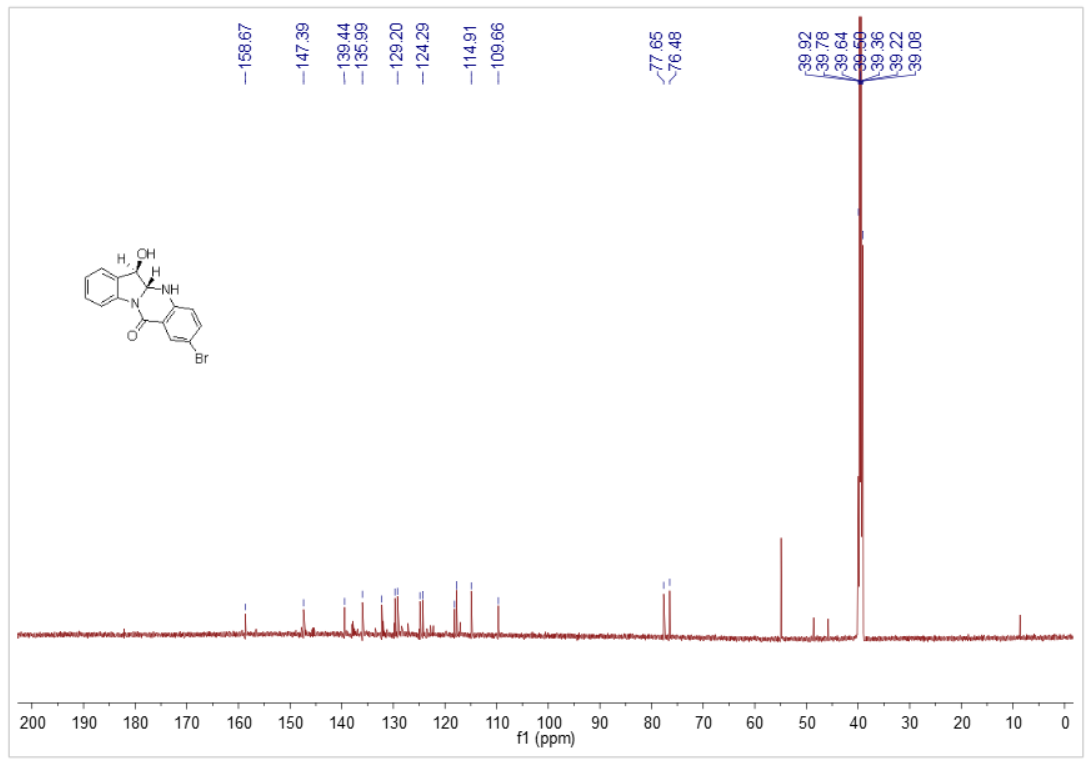


**Figure 59** 13C NMR of compound **5j**


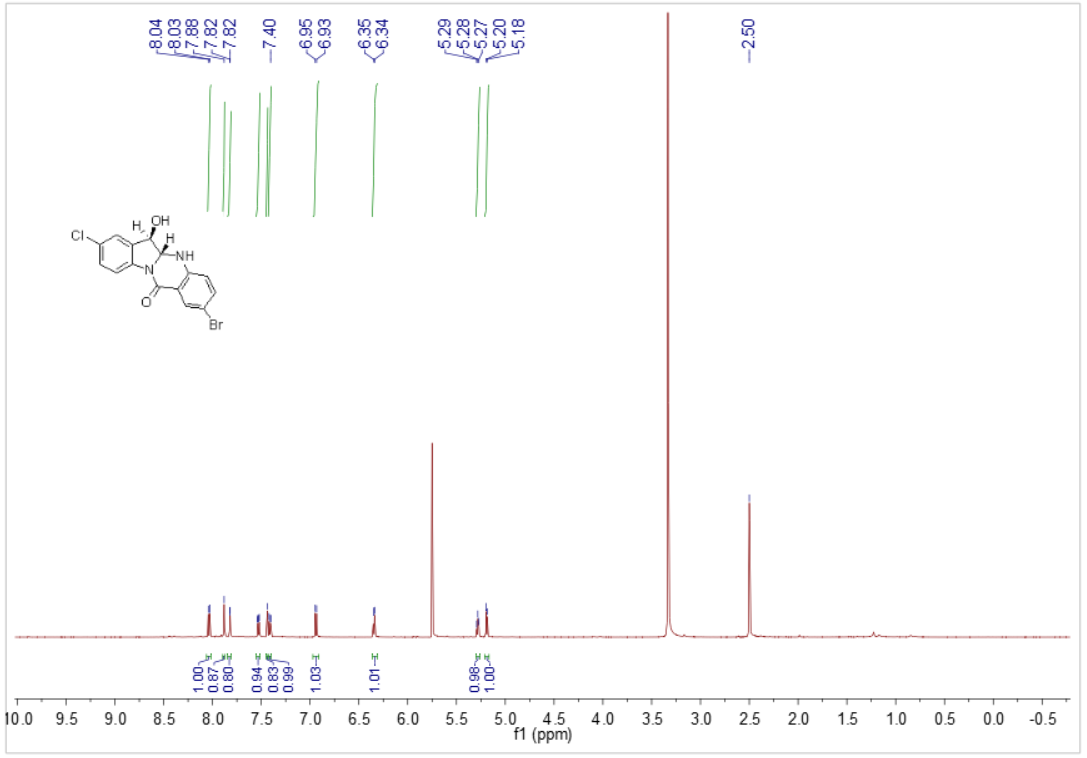


**Figure 60** 1H NMR of compound **5k**


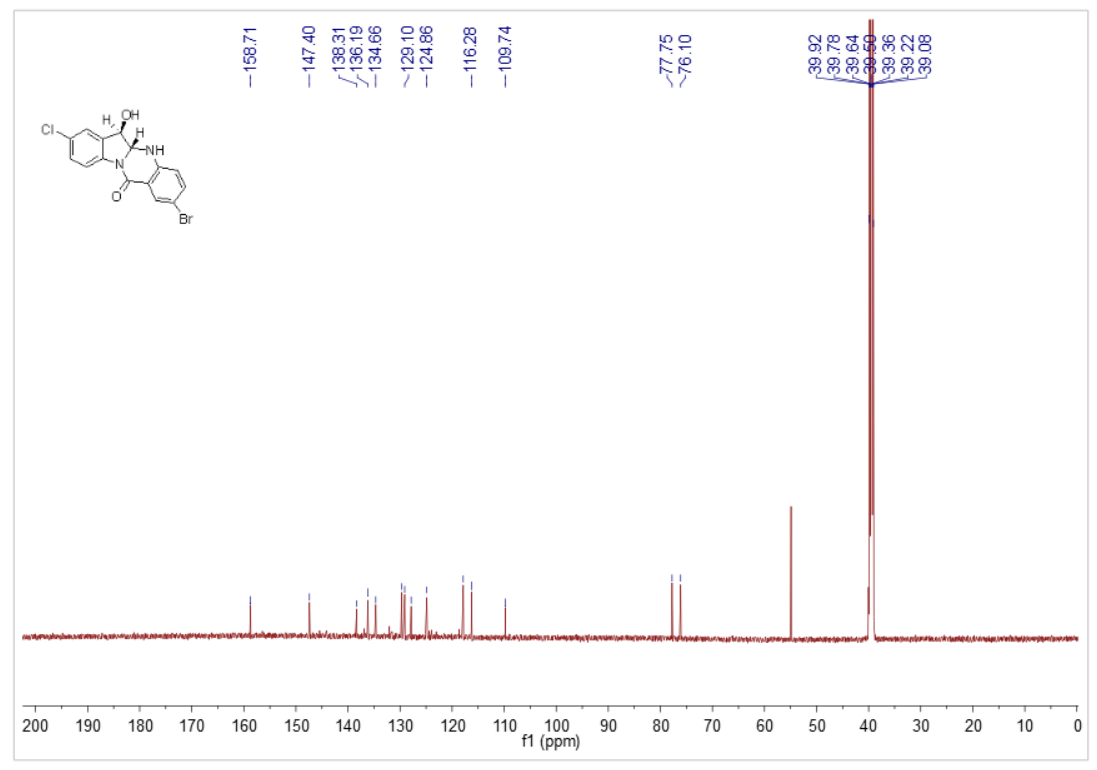


**Figure 61** 13C NMR of compound **5k**


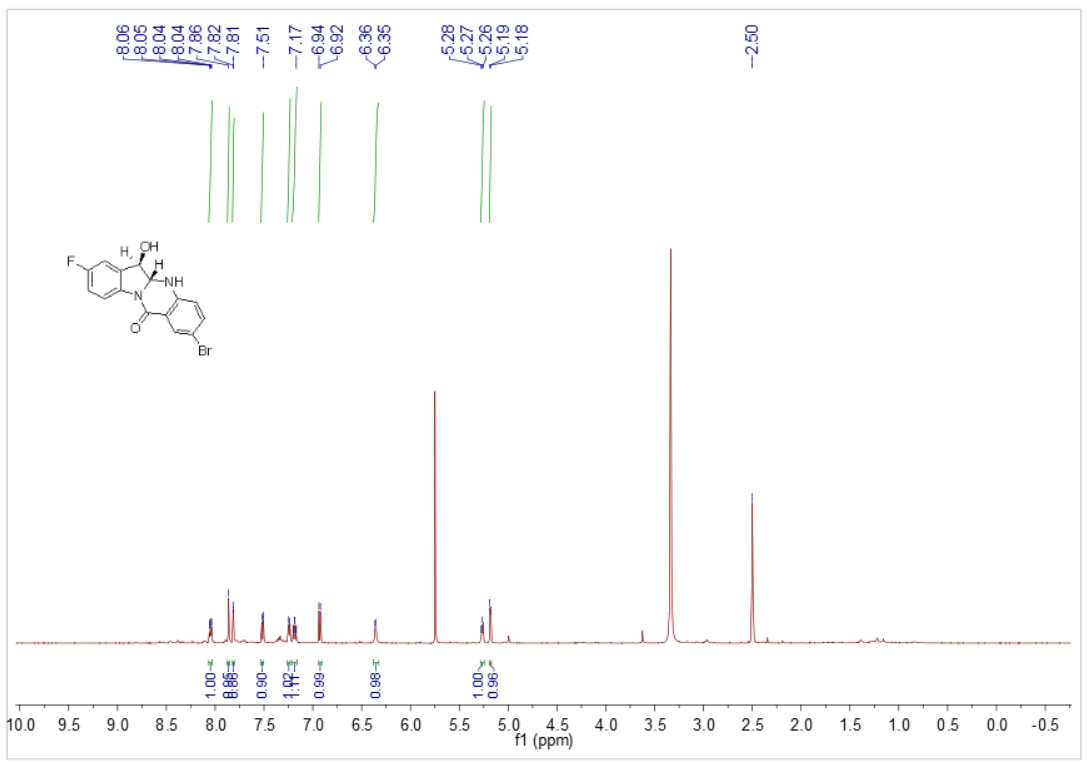


**Figure 62** 1H NMR of compound **5l**


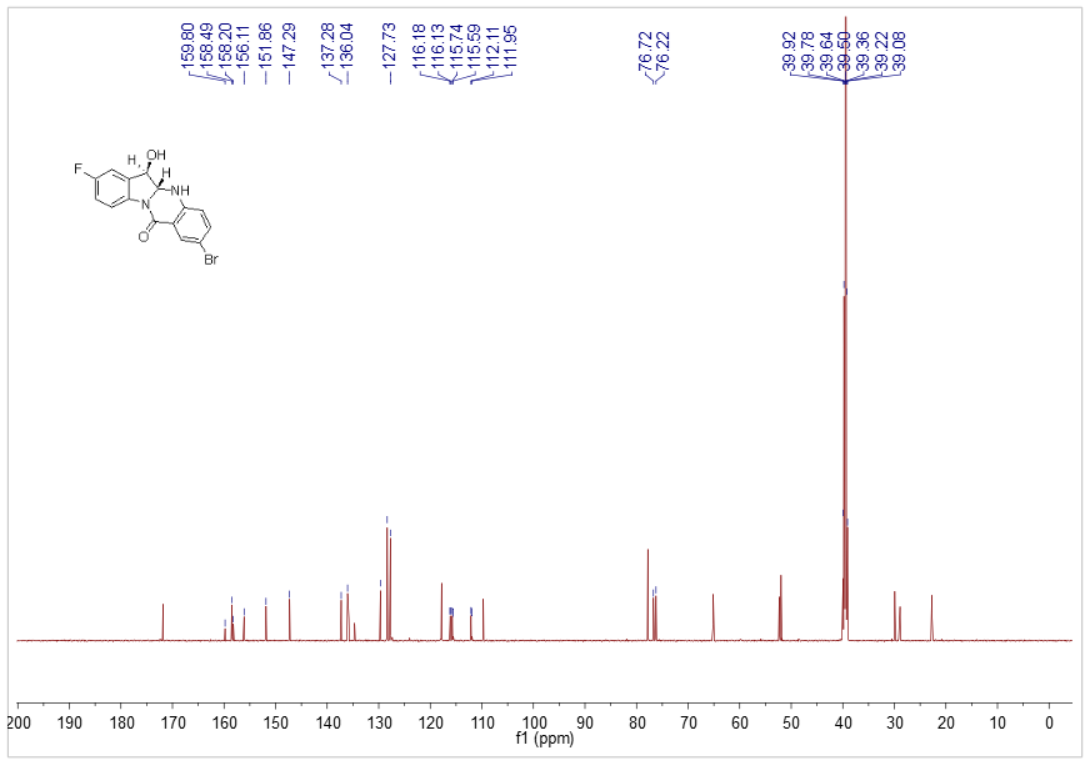


**Figure 63** 13C NMR of compound **5l**

**Spectra of HRMS**


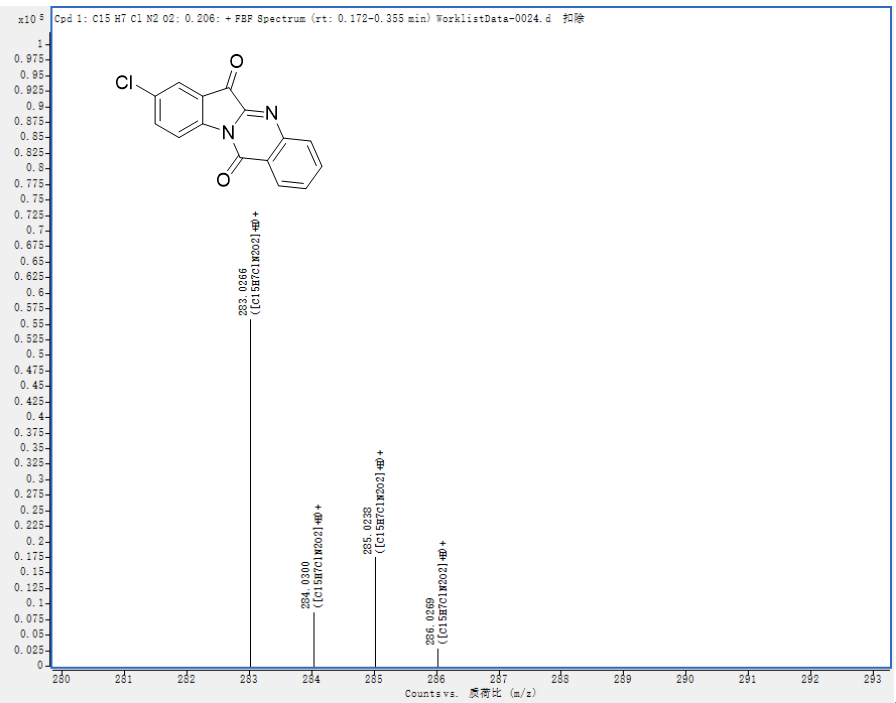


**Figure 64** HRMS of compound **3c**


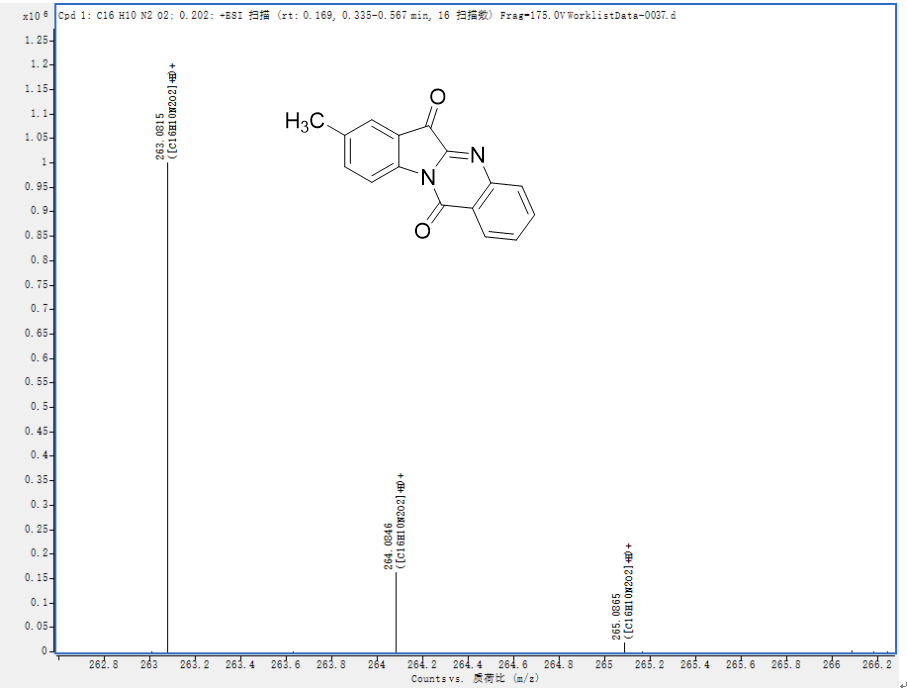


**Figure 65** HRMS of compound **3e**


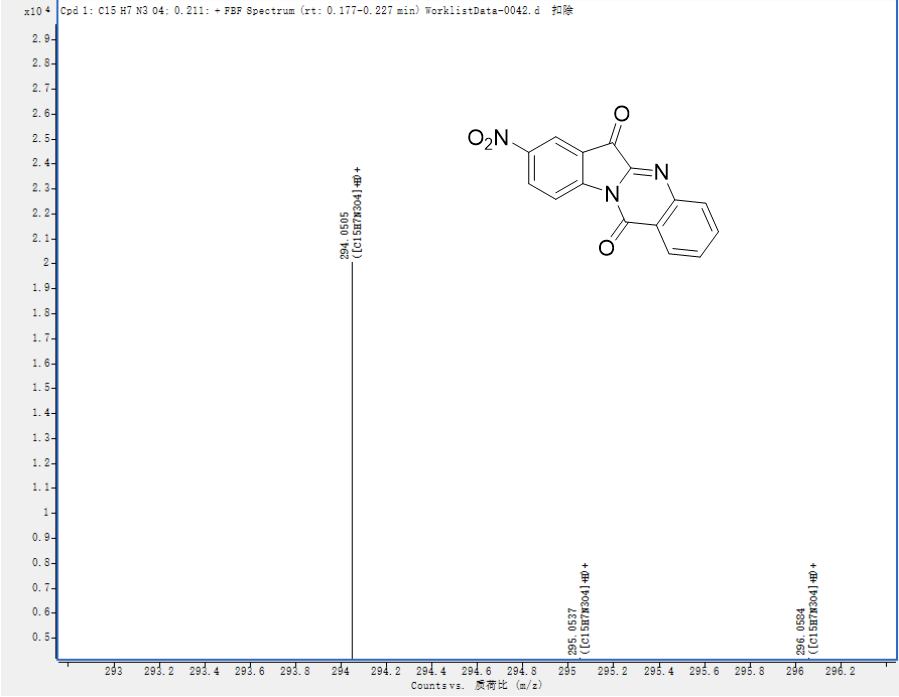


**Figure 66** HRMS of compound **3f**


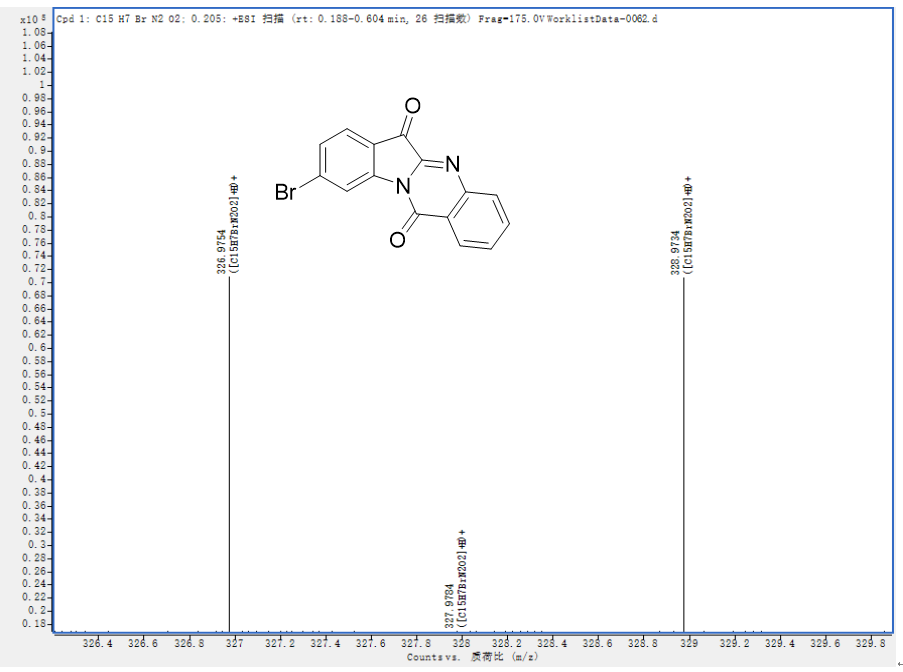


**Figure 67** HRMS of compound **3g**


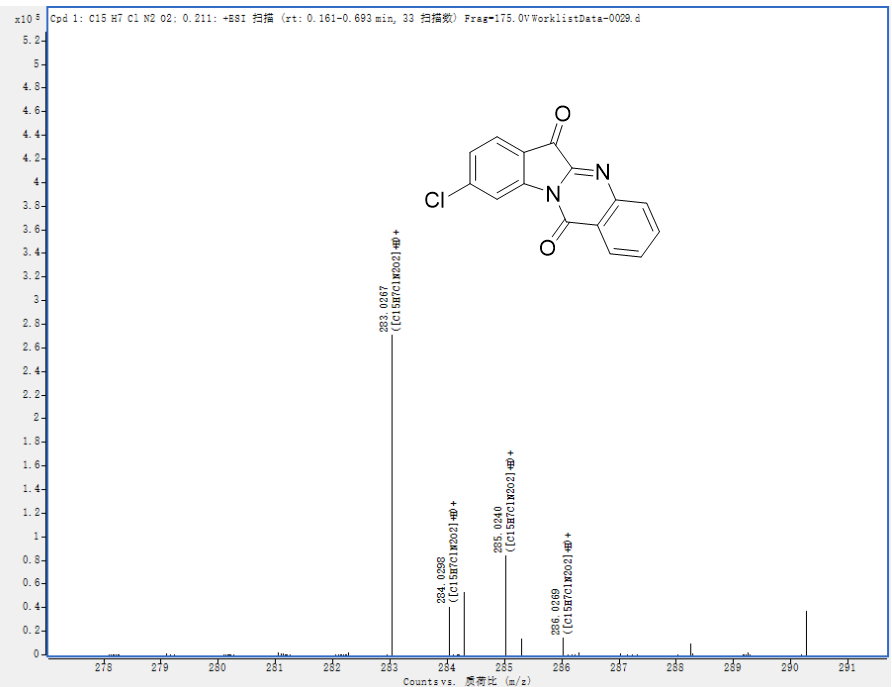


**Figure 68** HRMS of compound **3h**


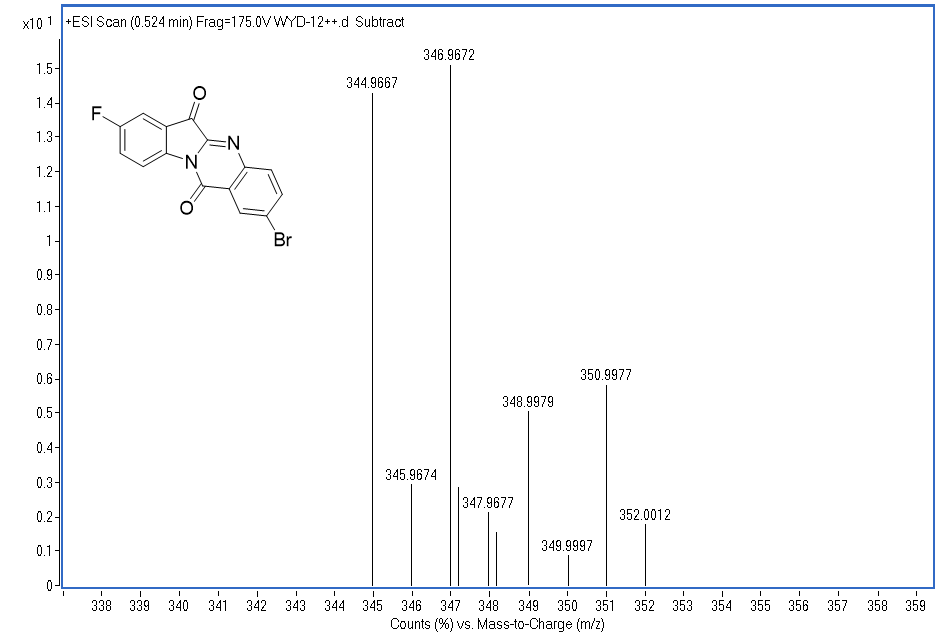


**Figure 69** HRMS of compound **3i**


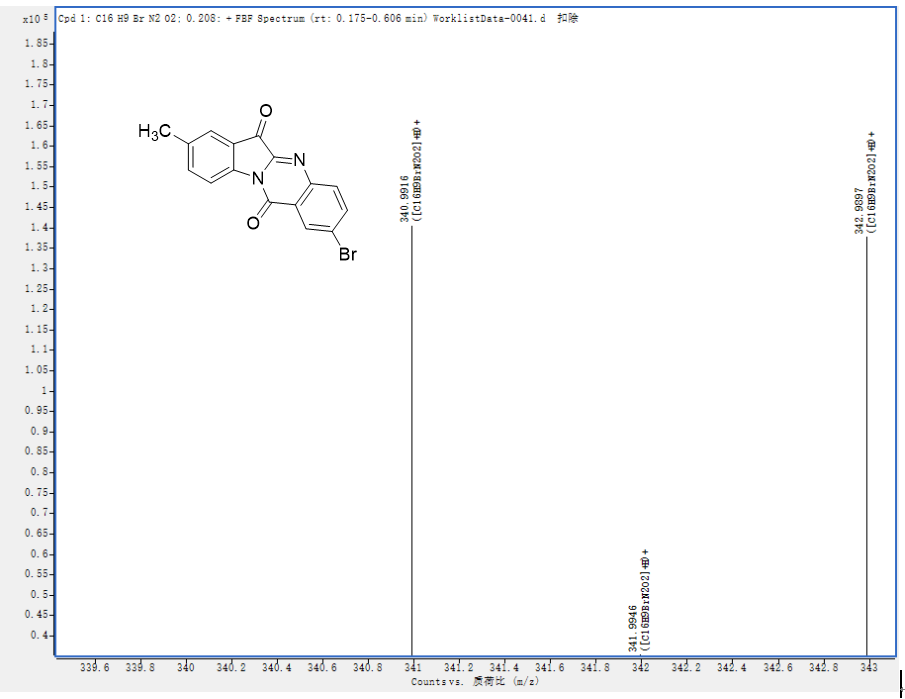


**Figure 70** HRMS of compound **3m**


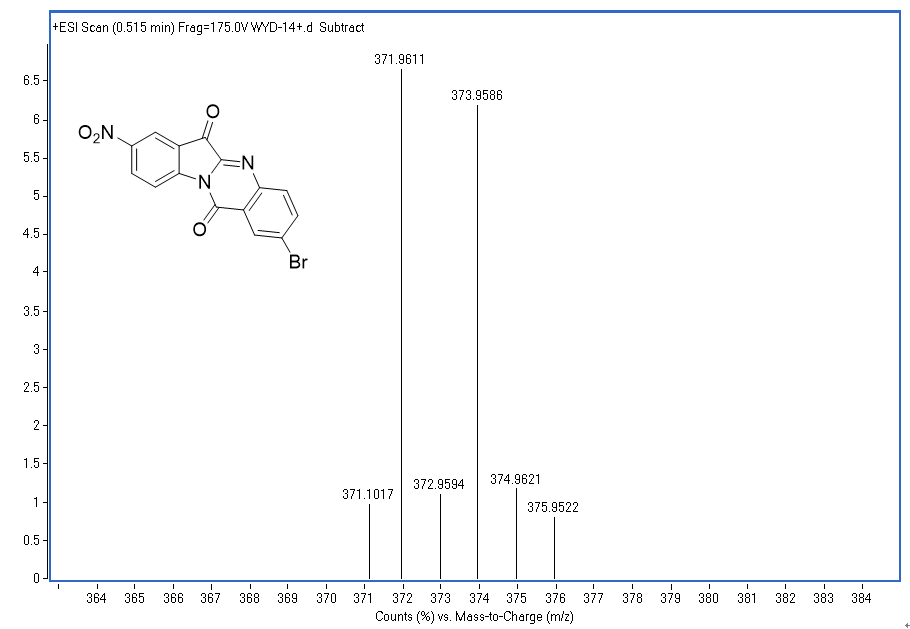


**Figure 71** HRMS of compound **3n**


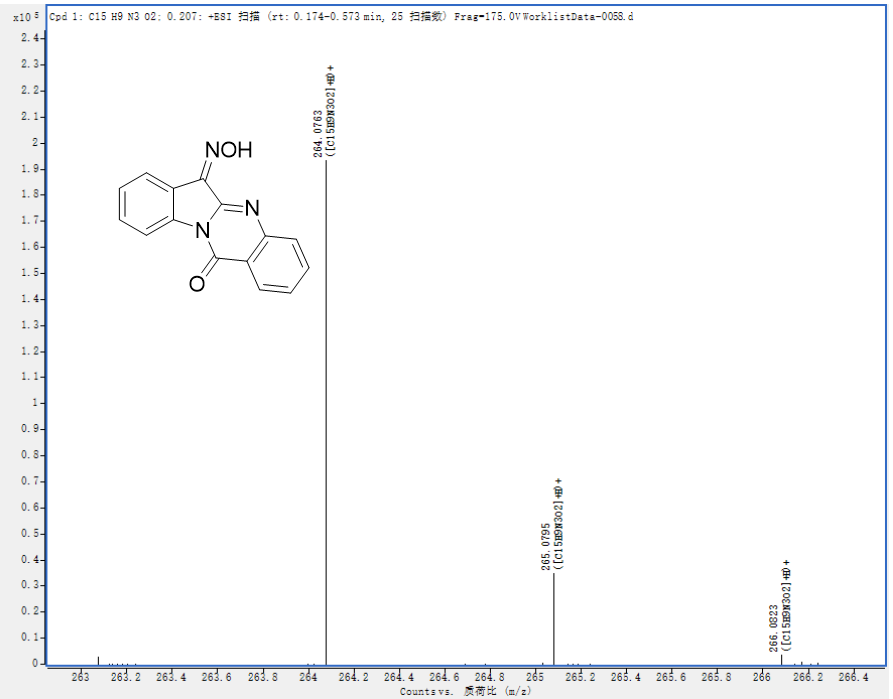


**Figure 72** HRMS of compound **4a**


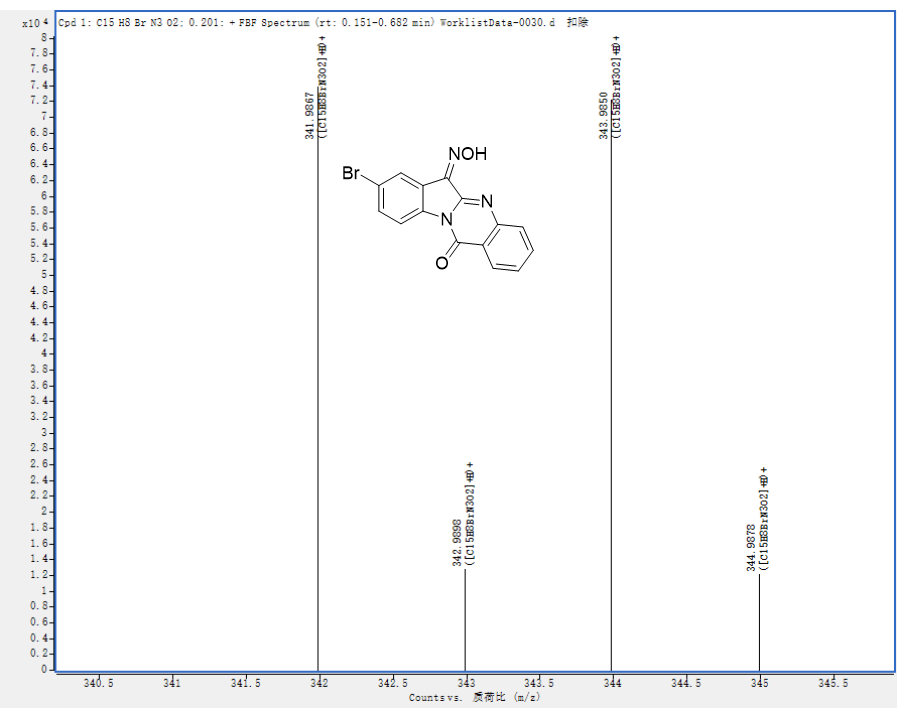


**Figure 73** HRMS of compound **4b**


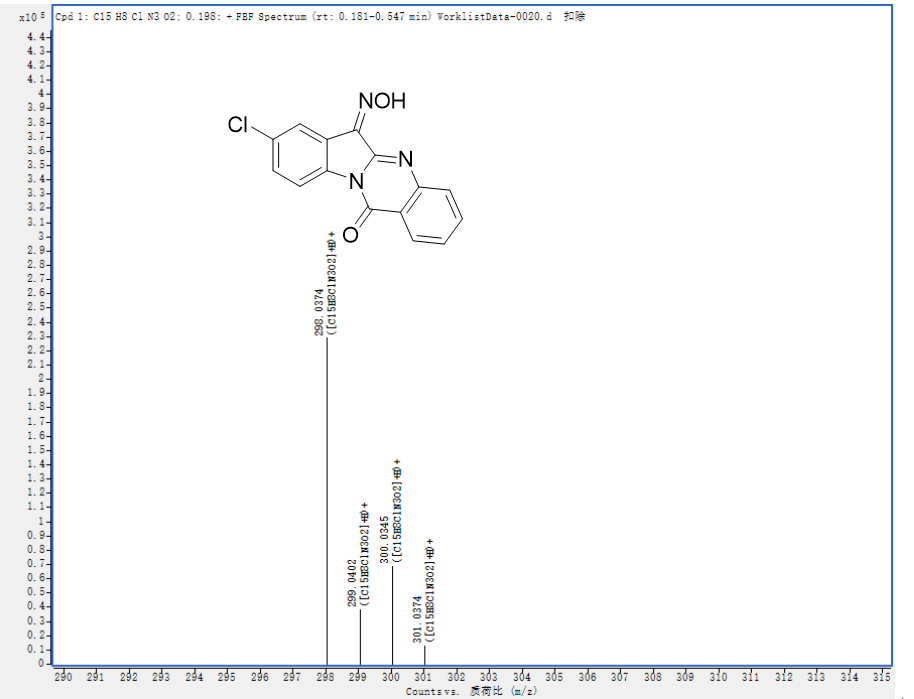


**Figure 74** HRMS of compound **4c**


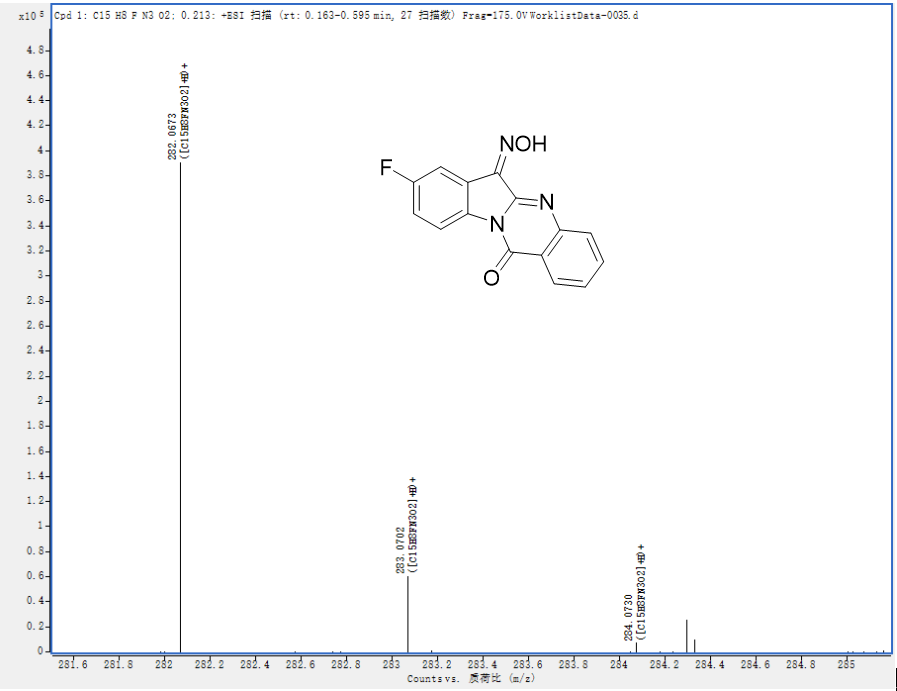


**Figure 75** HRMS of compound **4d**


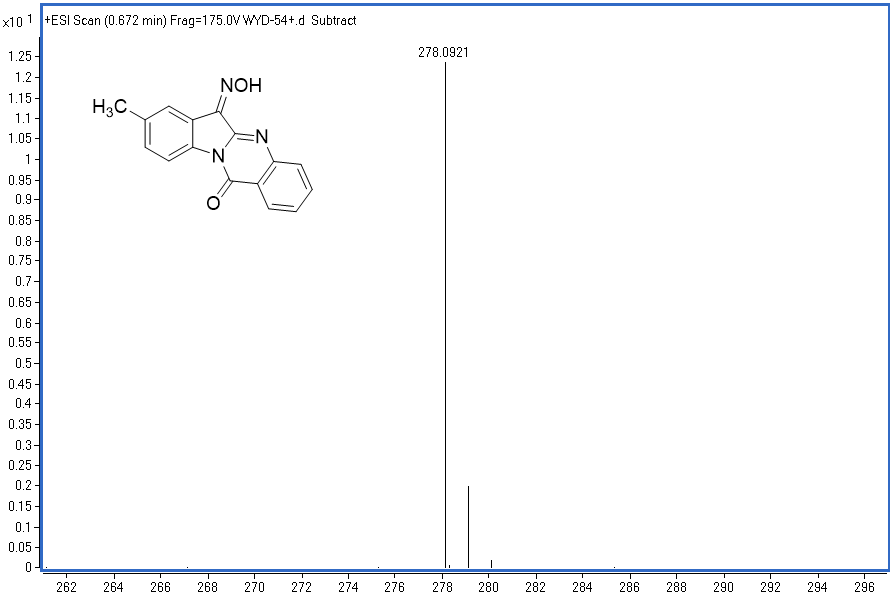


**Figure 76** HRMS of compound **4e**


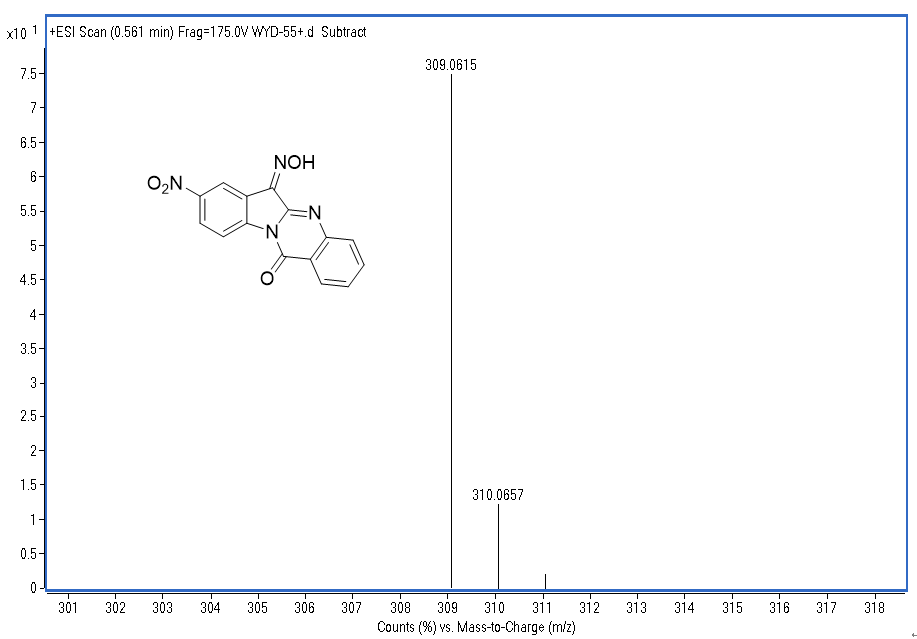


**Figure 77** HRMS of compound **4f**


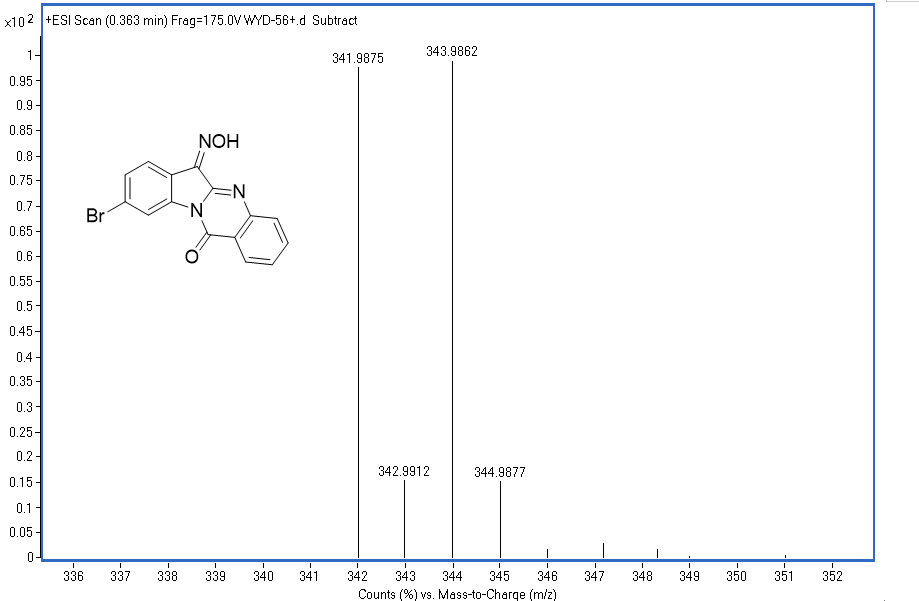


**Figure 78** HRMS of compound **4g**


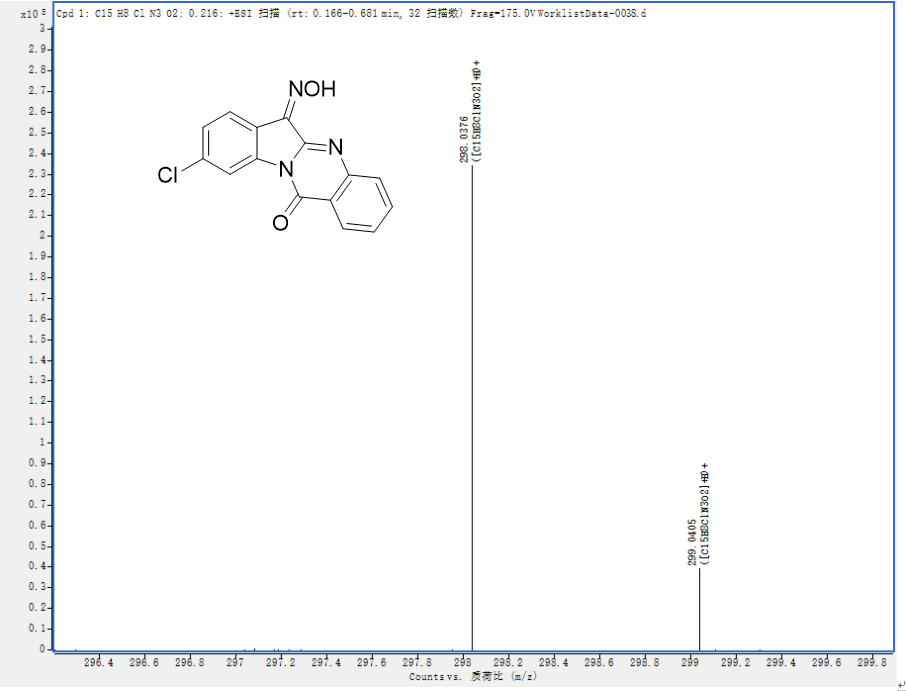


**Figure 79** HRMS of compound **4h**


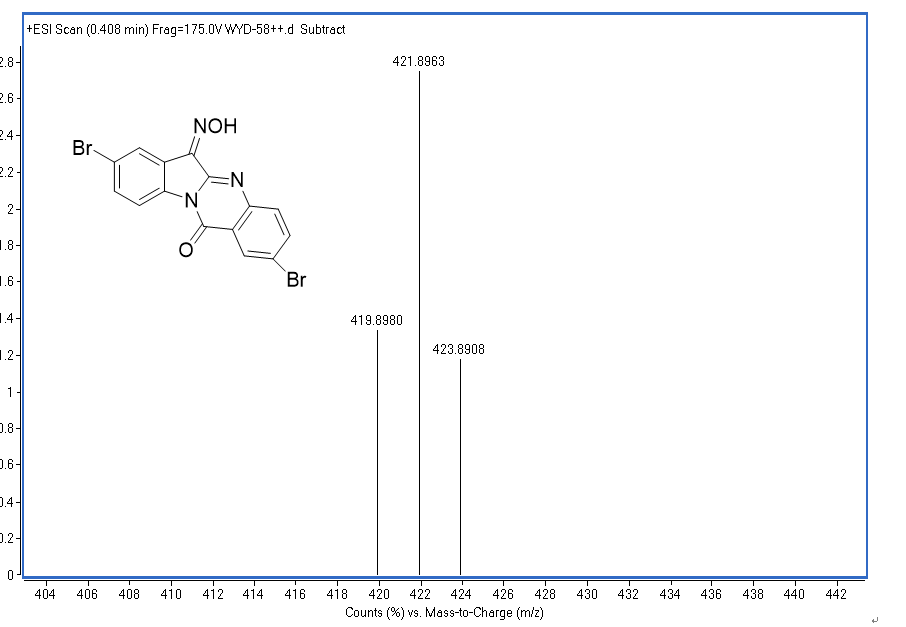


**Figure 80** HRMS of compound **4i**


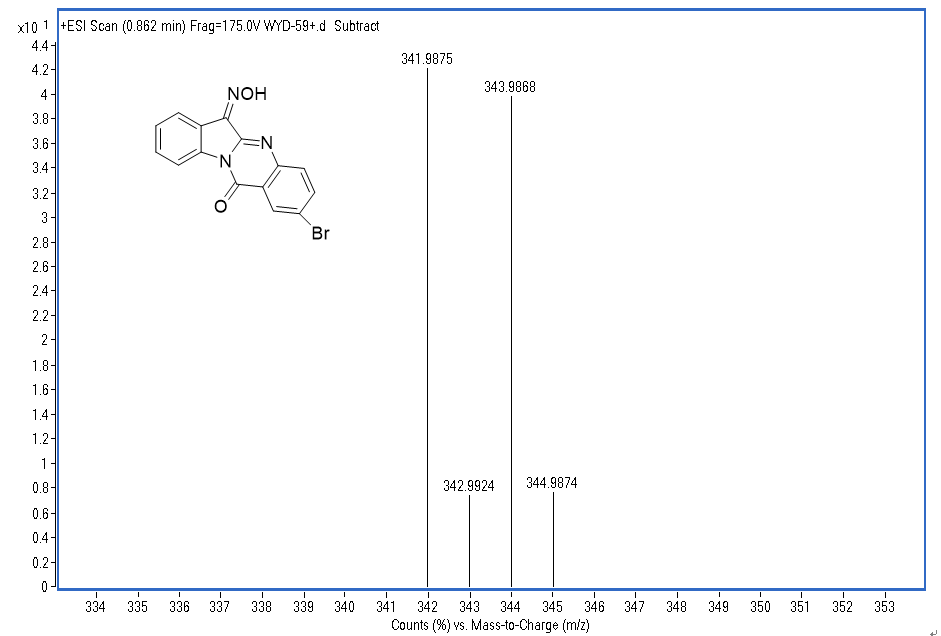


**Figure 81** HRMS of compound **4j**


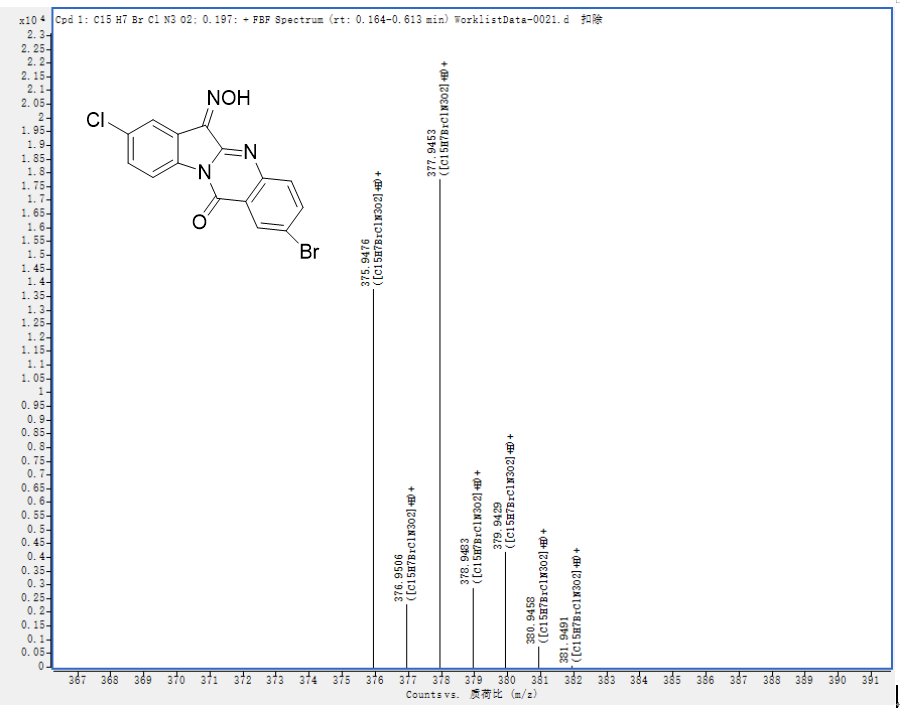


**Figure 82** HRMS of compound **4k**


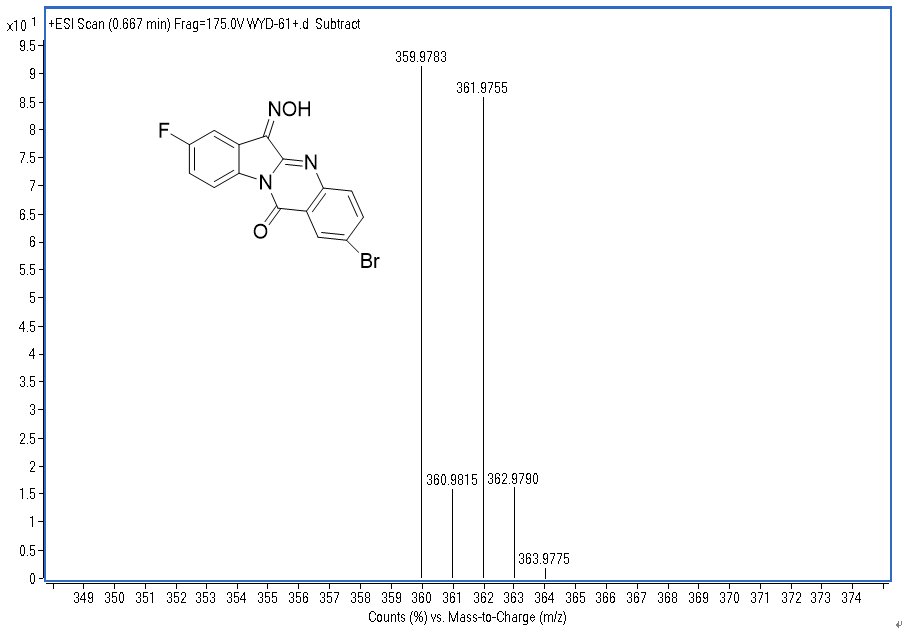


**Figure 83** HRMS of compound **4l**


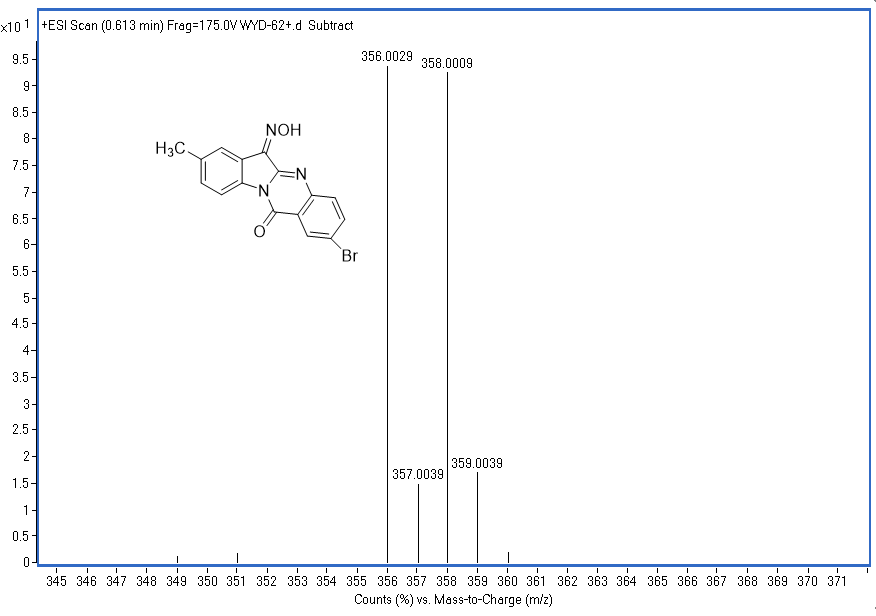


**Figure 84** HRMS of compound **4m**


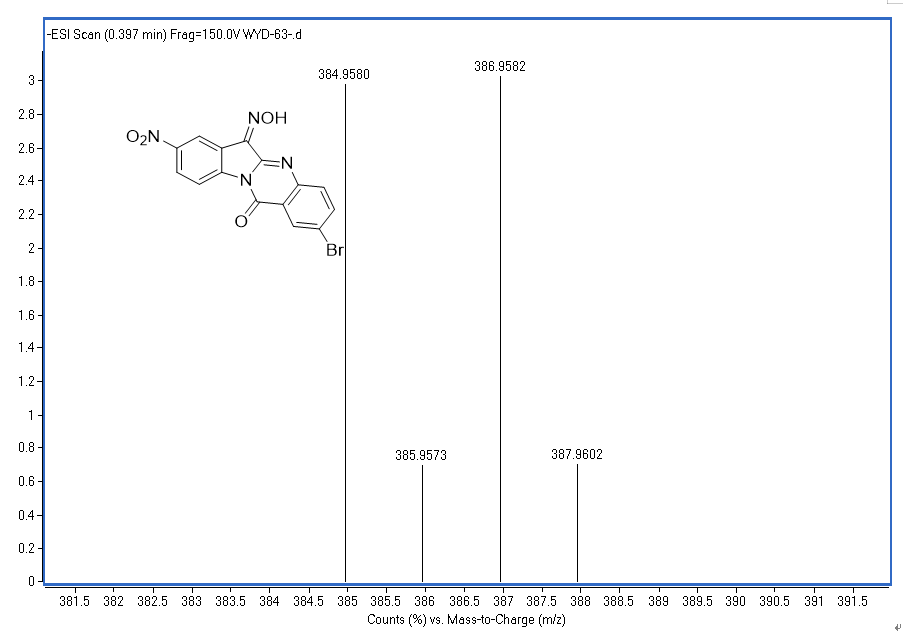
**Figure 85** HRMS of compound **4n**


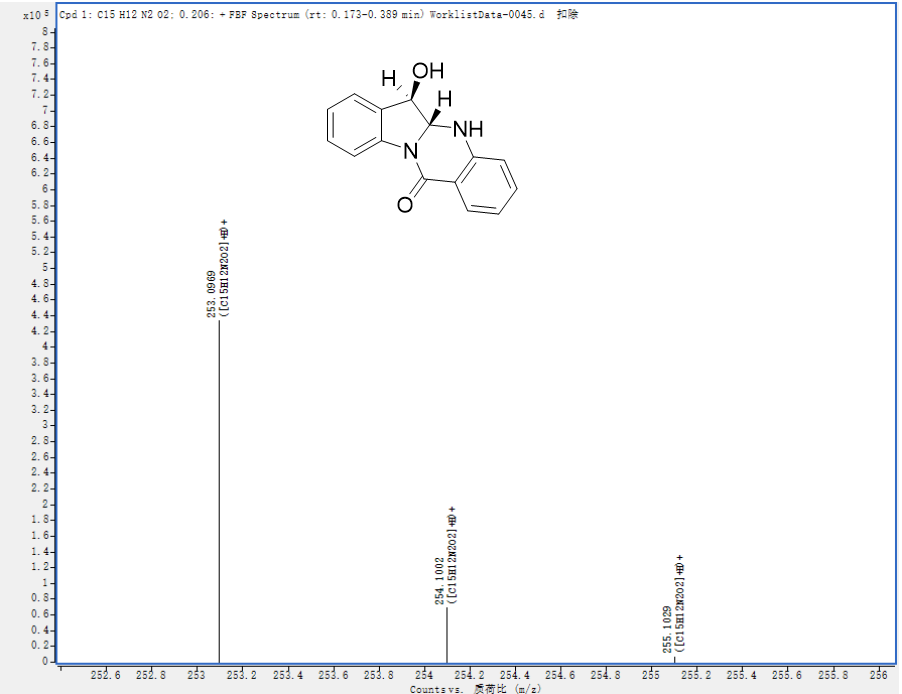
**Figure 86** HRMS of compound **5a**


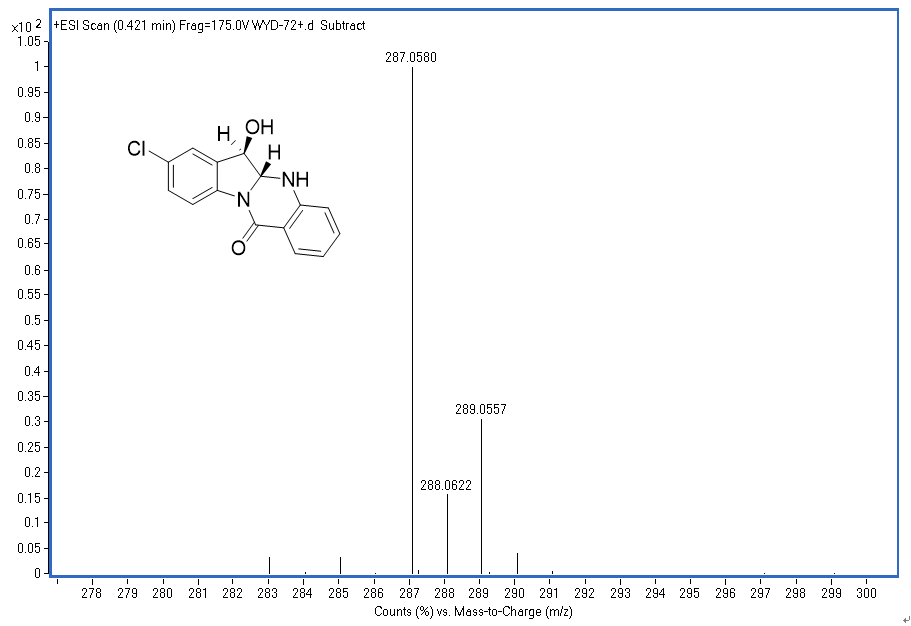
**Figure 87** HRMS of compound **5c**


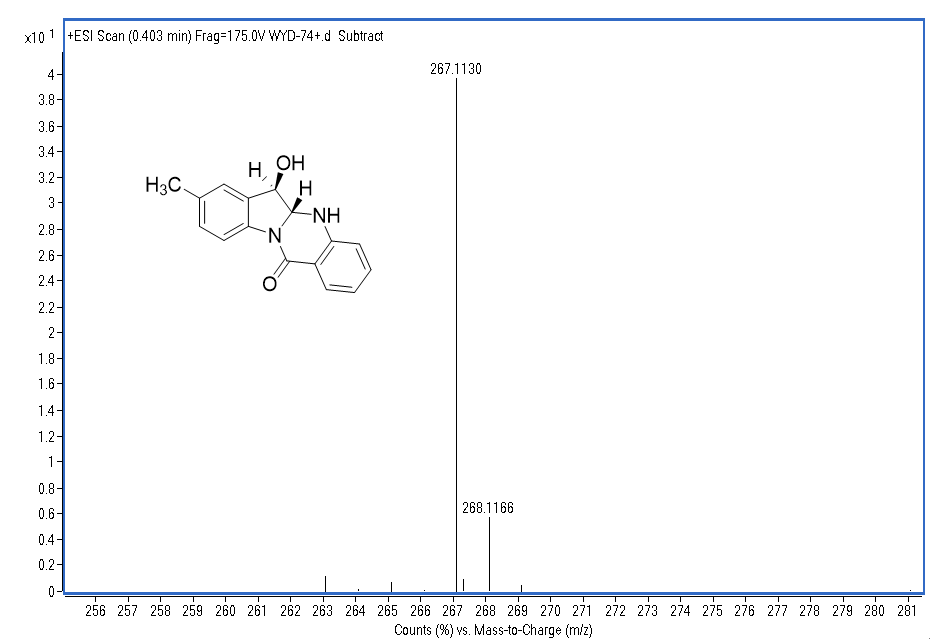
**Figure 88** HRMS of compound **5e**


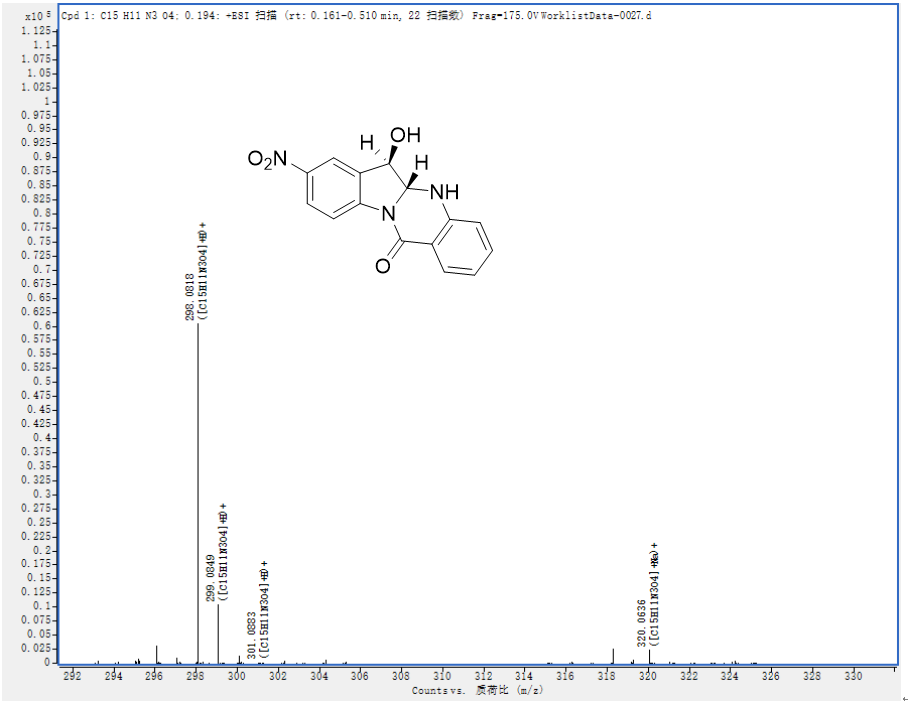
**Figure 89** HRMS of compound **5f**


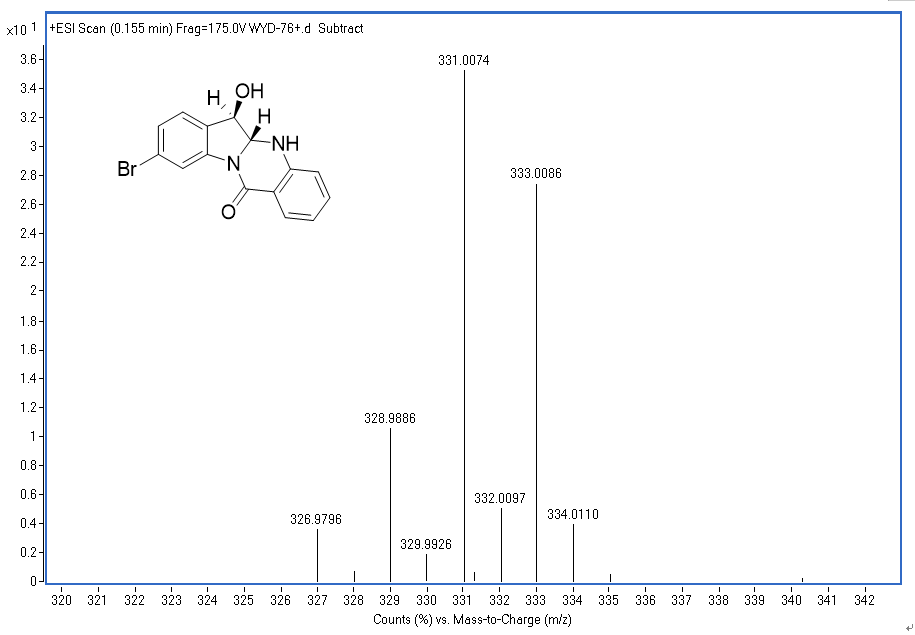


**Figure 90** HRMS of compound **5g**


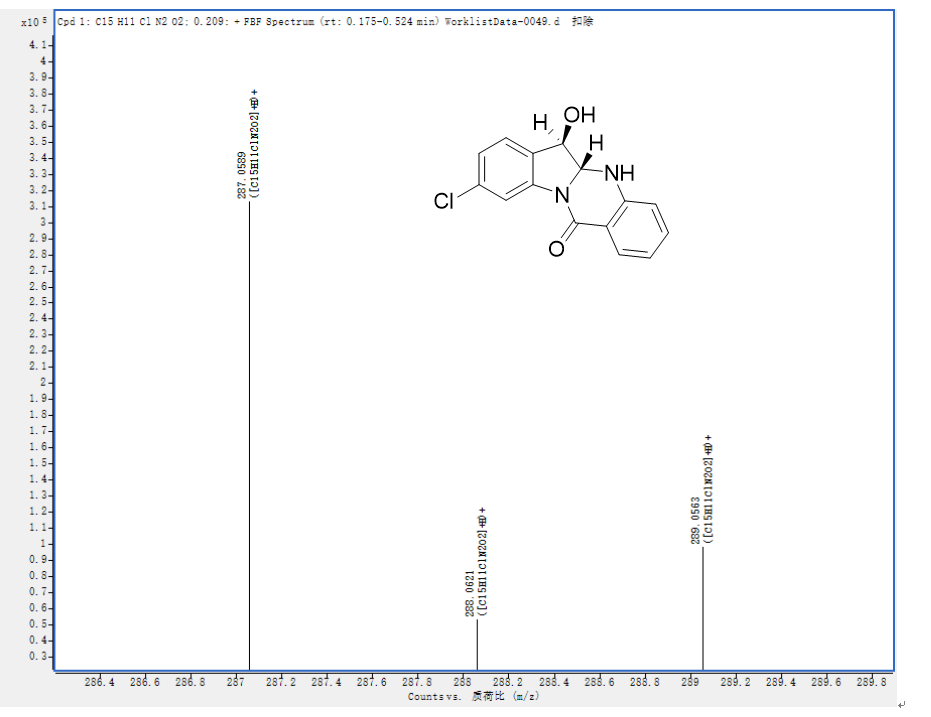
**Figure 91** HRMS of compound **5h**


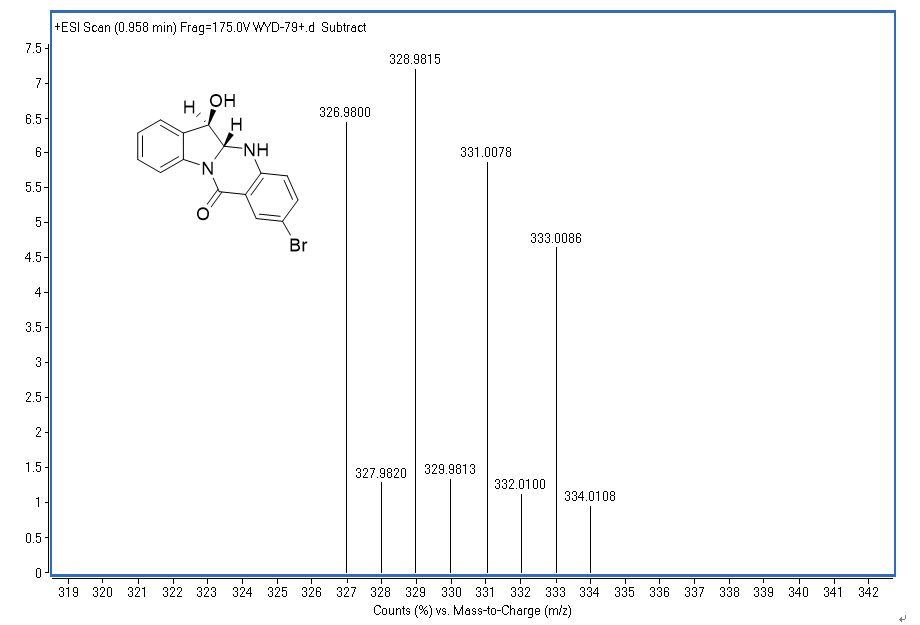
**Figure 92** HRMS of compound **5j**


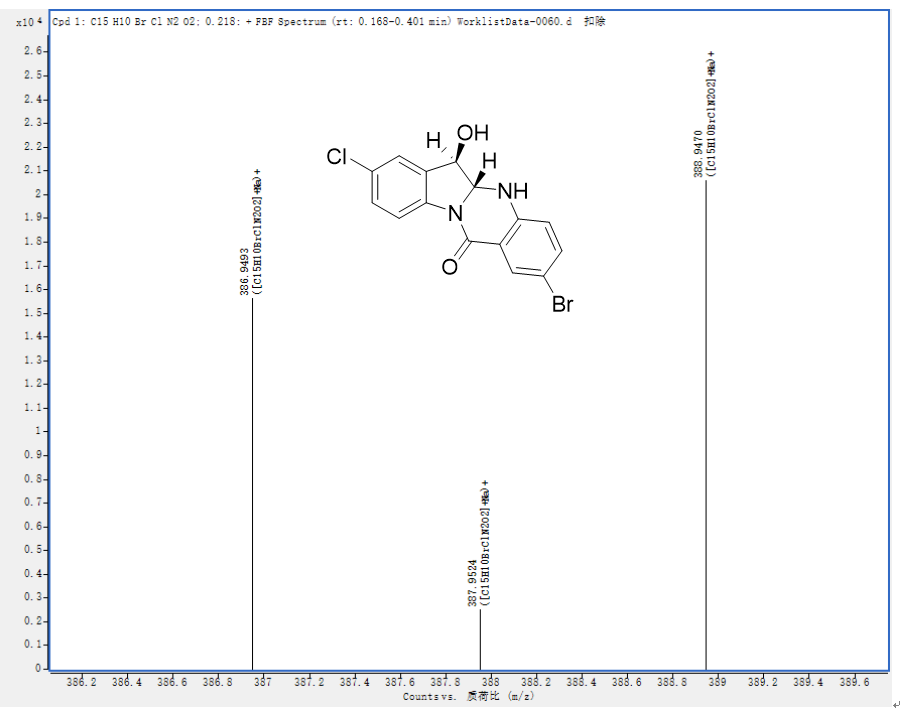
**Figure 93** HRMS of compound **5k**


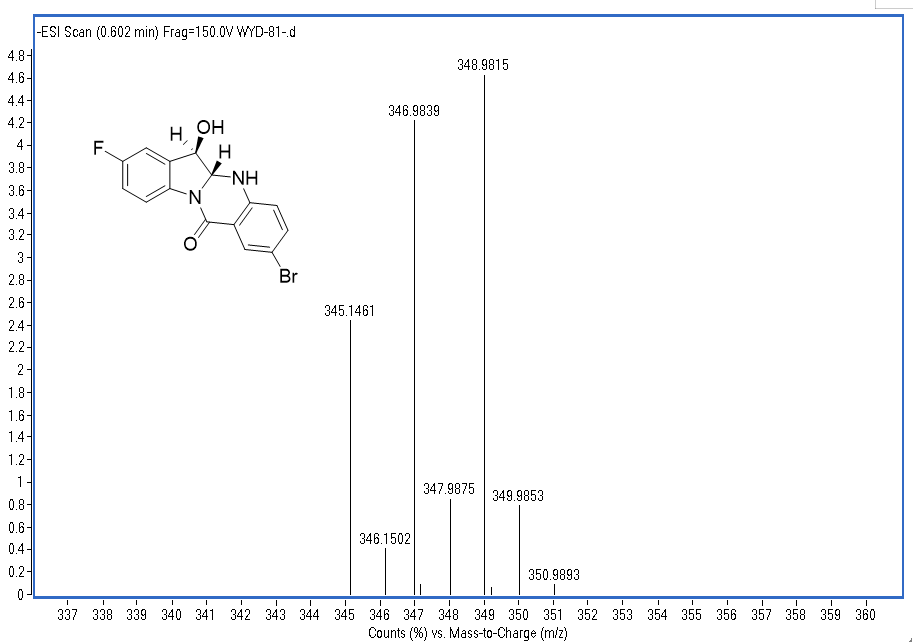
**Figure 94** HRMS of compound **5i**
